# Supplementary material for: l-Proline derived nitrogenous steroidal systems: an asymmetric approach to 14-azasteroids
Source: Royal Society of Chemistry journal article supplement (doi:10.1039/c3ra42272k), 2013-01-01
Supplement: c3ra42272k.pdf [file c3ra42272k.pdf]

Ritesh Singh and Gautam Panda\*

Medicinal and Process Chemistry Division, Central Drug Research Institute, Lucknow-226001, UP, India

email:gautam.panda@gmail.com

**Supporting Information**

| <b>Contents</b>                                                                       | <b>Page</b> |
|---------------------------------------------------------------------------------------|-------------|
| 1. Copies of 1D and 2D spectra of compounds <b>1b</b> and <b>1b'</b>                  | 2-12        |
| 2. Copies of 1D spectra of compounds <b>2b</b> and <b>2b'</b>                         | 13-16       |
| 3. Copies of 1D spectra of compounds <b>4b, 8</b> and <b>7</b>                        | 17-20       |
| 4. Copies of 1D and 2D spectra of compounds <b>1a</b> and <b>1a'</b>                  | 21-29       |
| 5. Copies of 1D spectra of compounds <b>2a</b> and <b>2a'</b>                         | 30-33       |
| 6. Copies of 1D and 2D spectra of compounds <b>1g</b> and <b>1g'</b>                  | 34-42       |
| 7. Copies of 1D spectra of compounds <b>2g</b> and <b>2g'</b>                         | 43-46       |
| 8. Copies of 1D spectra of compoundss <b>4c, 14, 10, 12</b> and <b>1g''</b>           | 47-53       |
| 9. Copies of 1D spectra of compounds <b>1d</b> and <b>1d'</b>                         | 54-56       |
| 10. Copies of 1D spectra of compoundss <b>2d, 2d', 2f, 2f', 2e, 2j</b> and <b>2j'</b> | 57-70       |
| 11. Copies of 1D spectra of compounds <b>1j, 1e</b> and <b>1e'</b>                    | 71-73       |
| 12. Copies of 1D spectra of compounds <b>4d, 15, 13, 2c</b> and <b>2c'</b>            | 74-82       |
| 13. Copies of 1D spectra of compounds <b>2i</b> and <b>2i'</b>                        | 83-86       |
| 14. Copies of 1D spectra of compounds <b>2h, 2h', 4e</b> and <b>19</b>                | 87-94       |

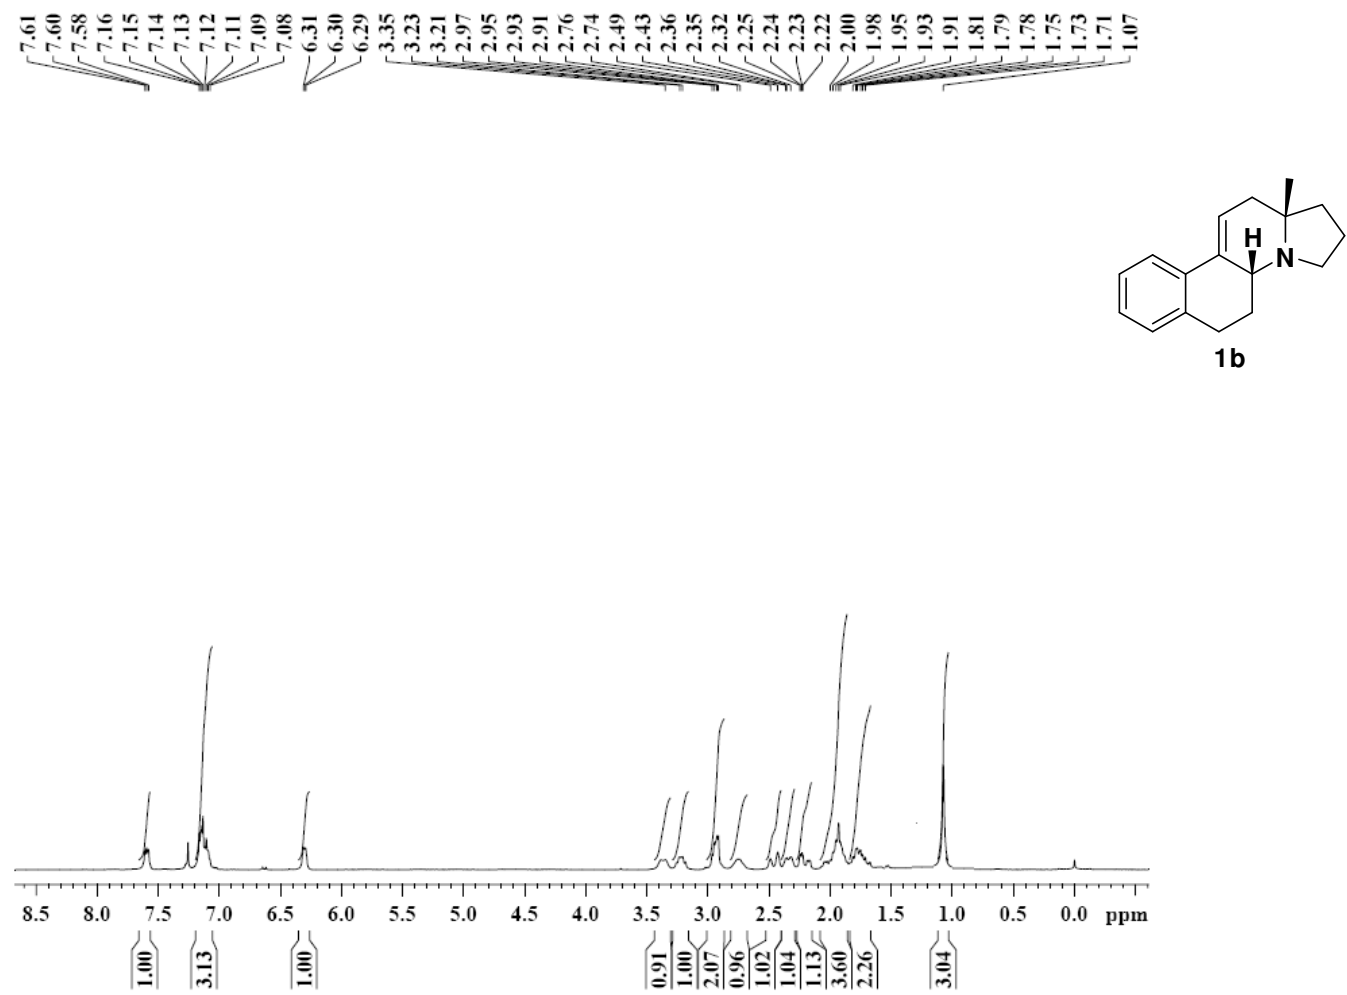

Fig.1 <sup>1</sup>H spectra of compound **1b**

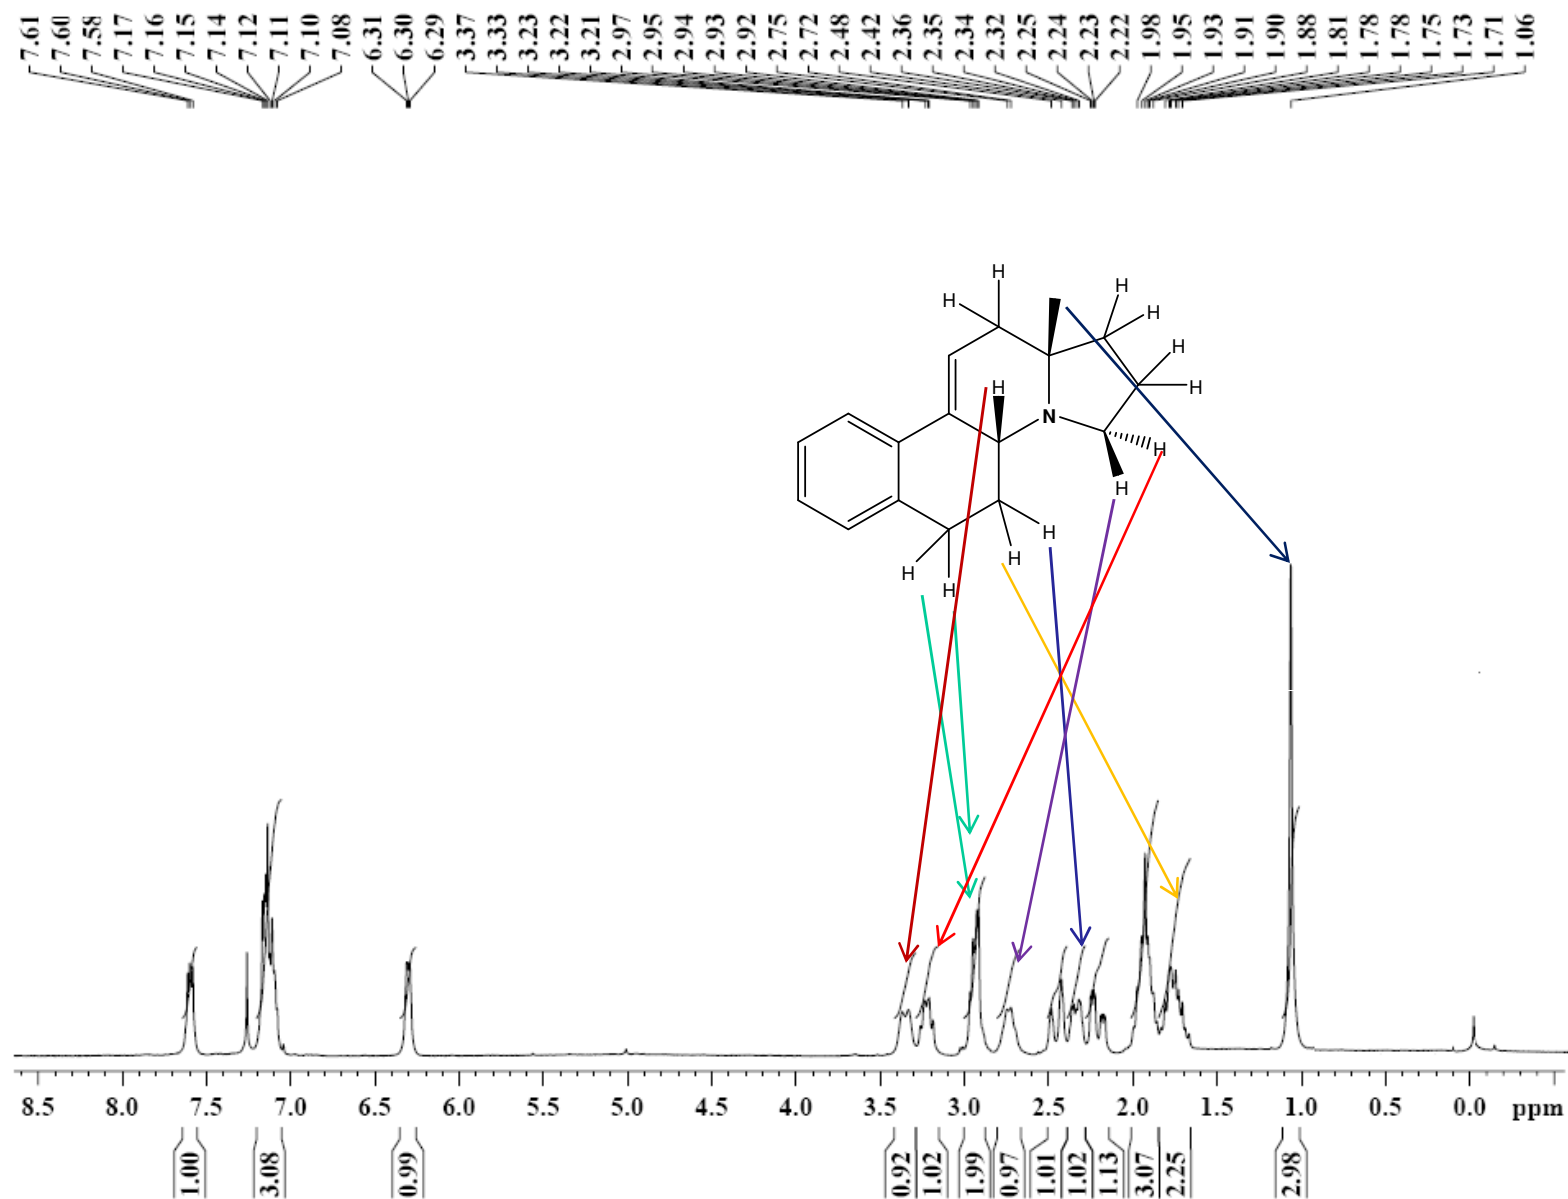

Fig. 2  $^1\text{H}$  spectra of compound **1b**

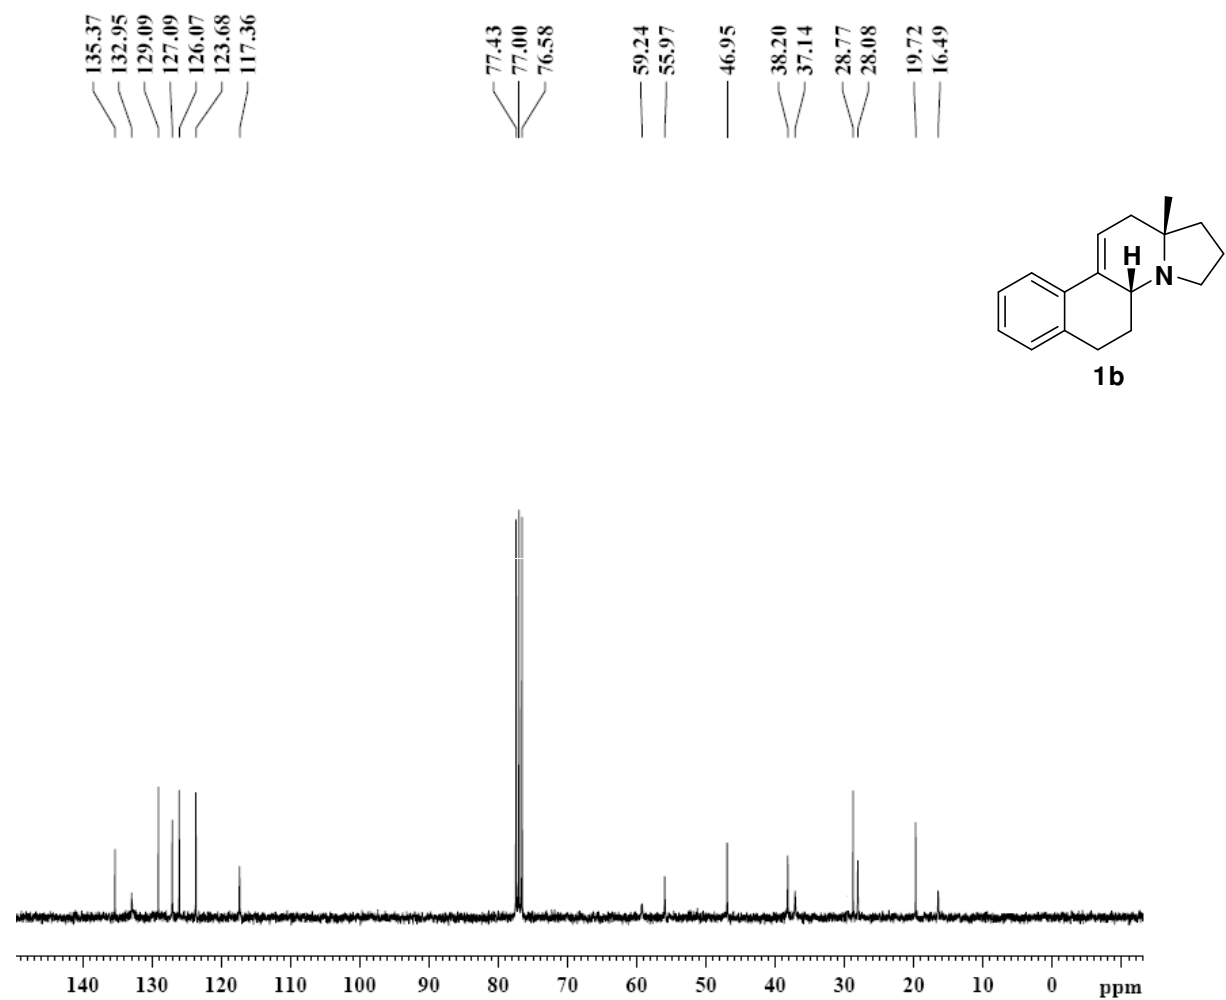

Fig.3  $^{13}\text{C}$  spectra of compound **1b**

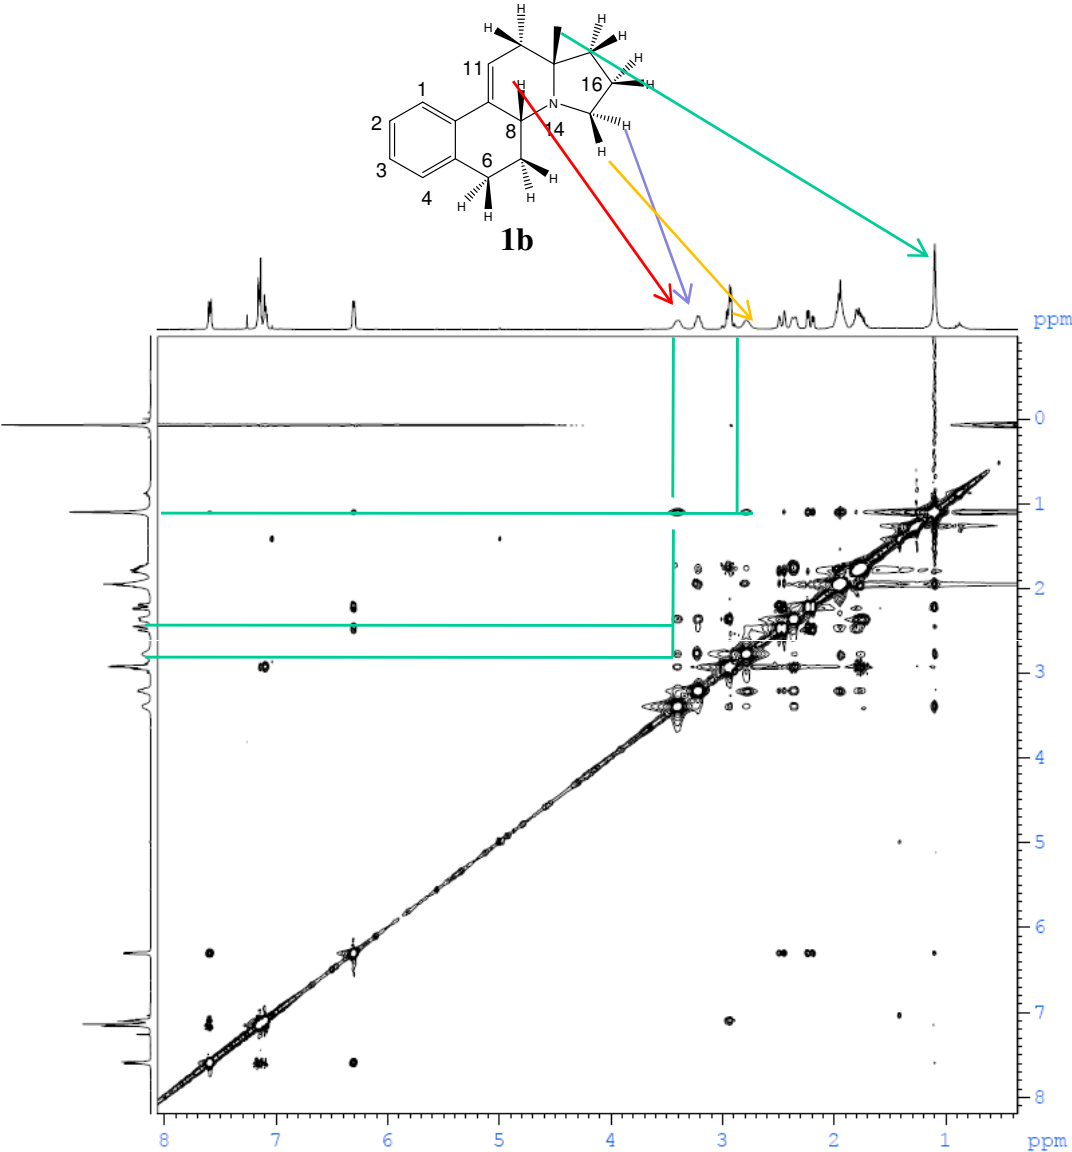

Fig.4 NOESY (full spectra) of compound **1b**

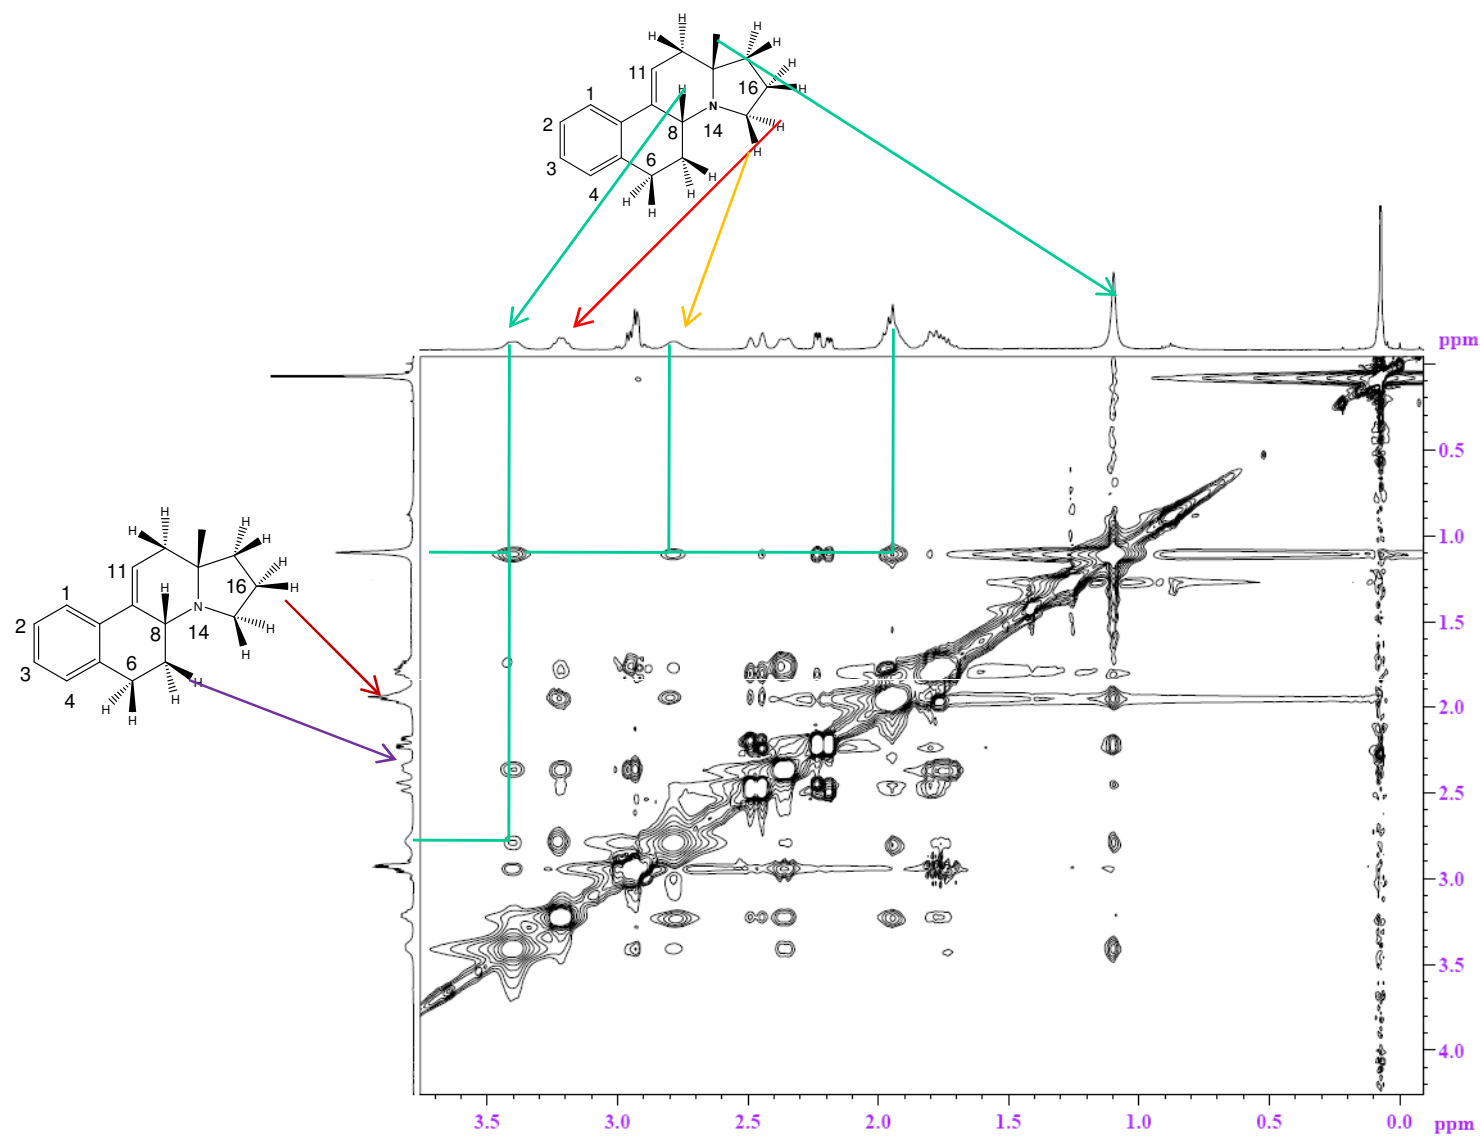

Fig.5 NOESY (0-3.7 ppm expanded spectra) of compound **1b**

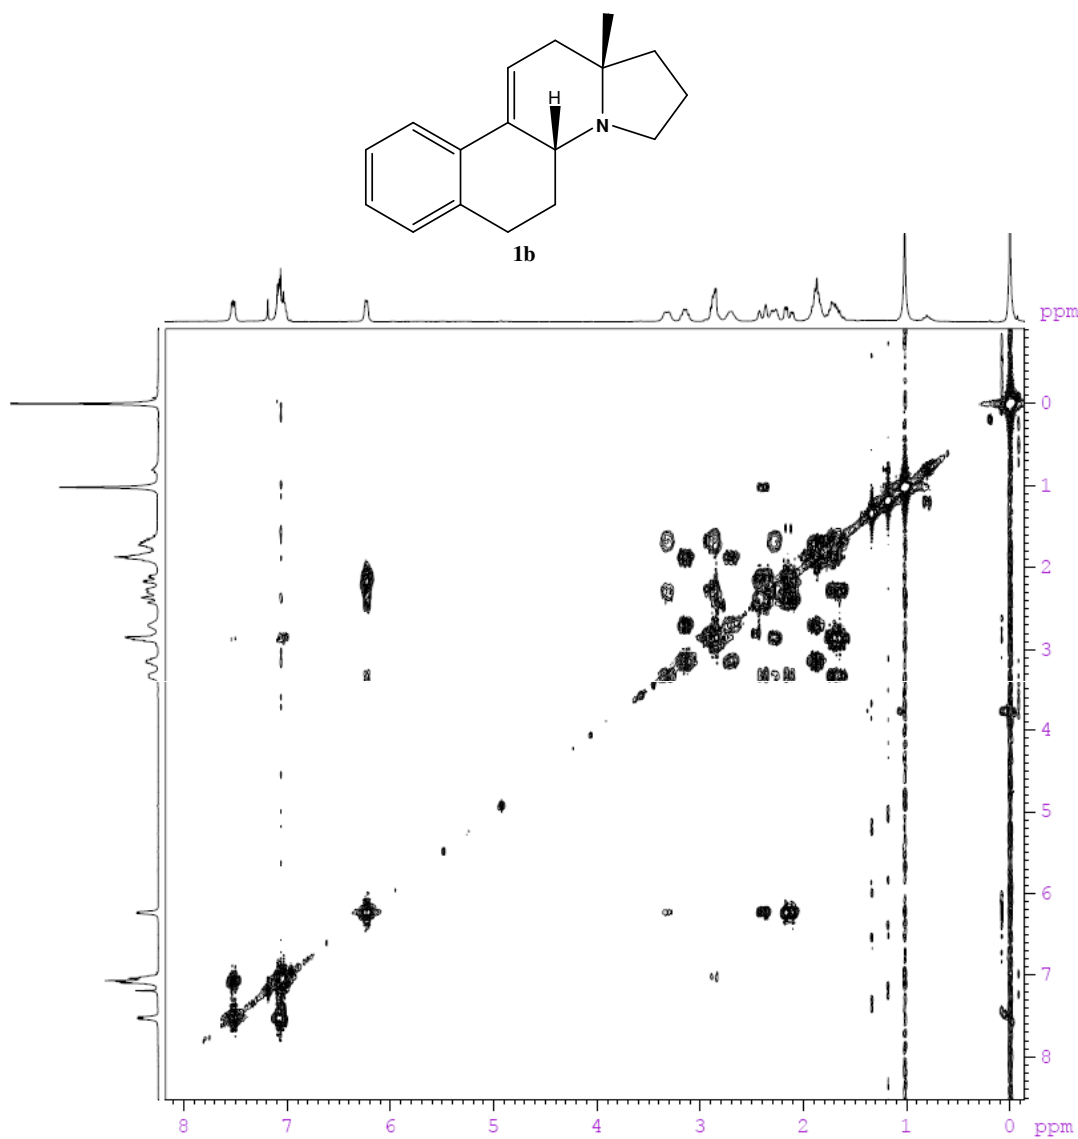

Fig.6 COSY (full spectra) of compound **1b**

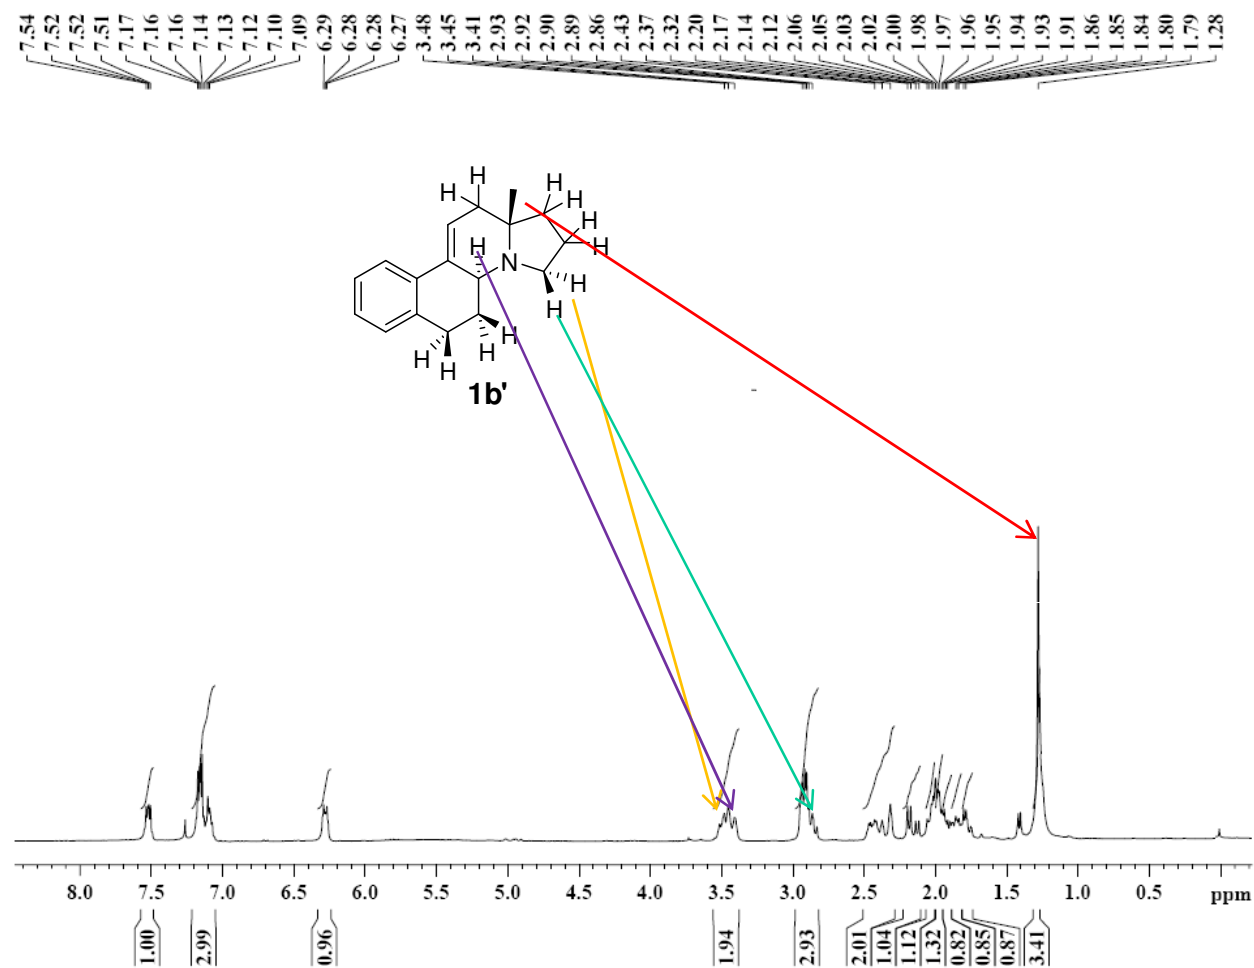

Fig.7  $^1\text{H}$  spectra of compound **1b'**

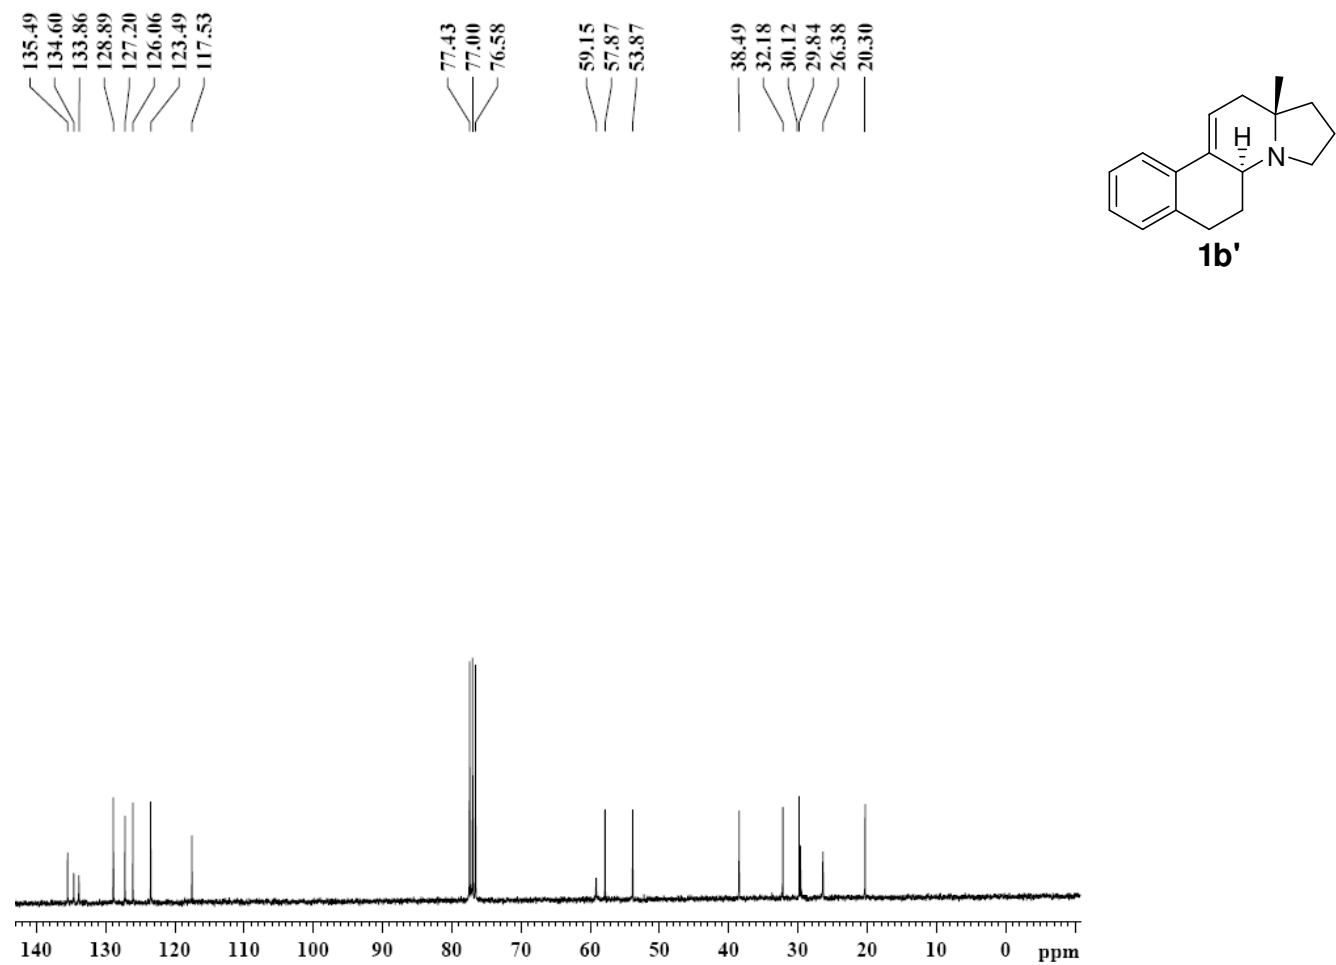

Fig.8  $^{13}\text{C}$  spectra of compound **1b'**

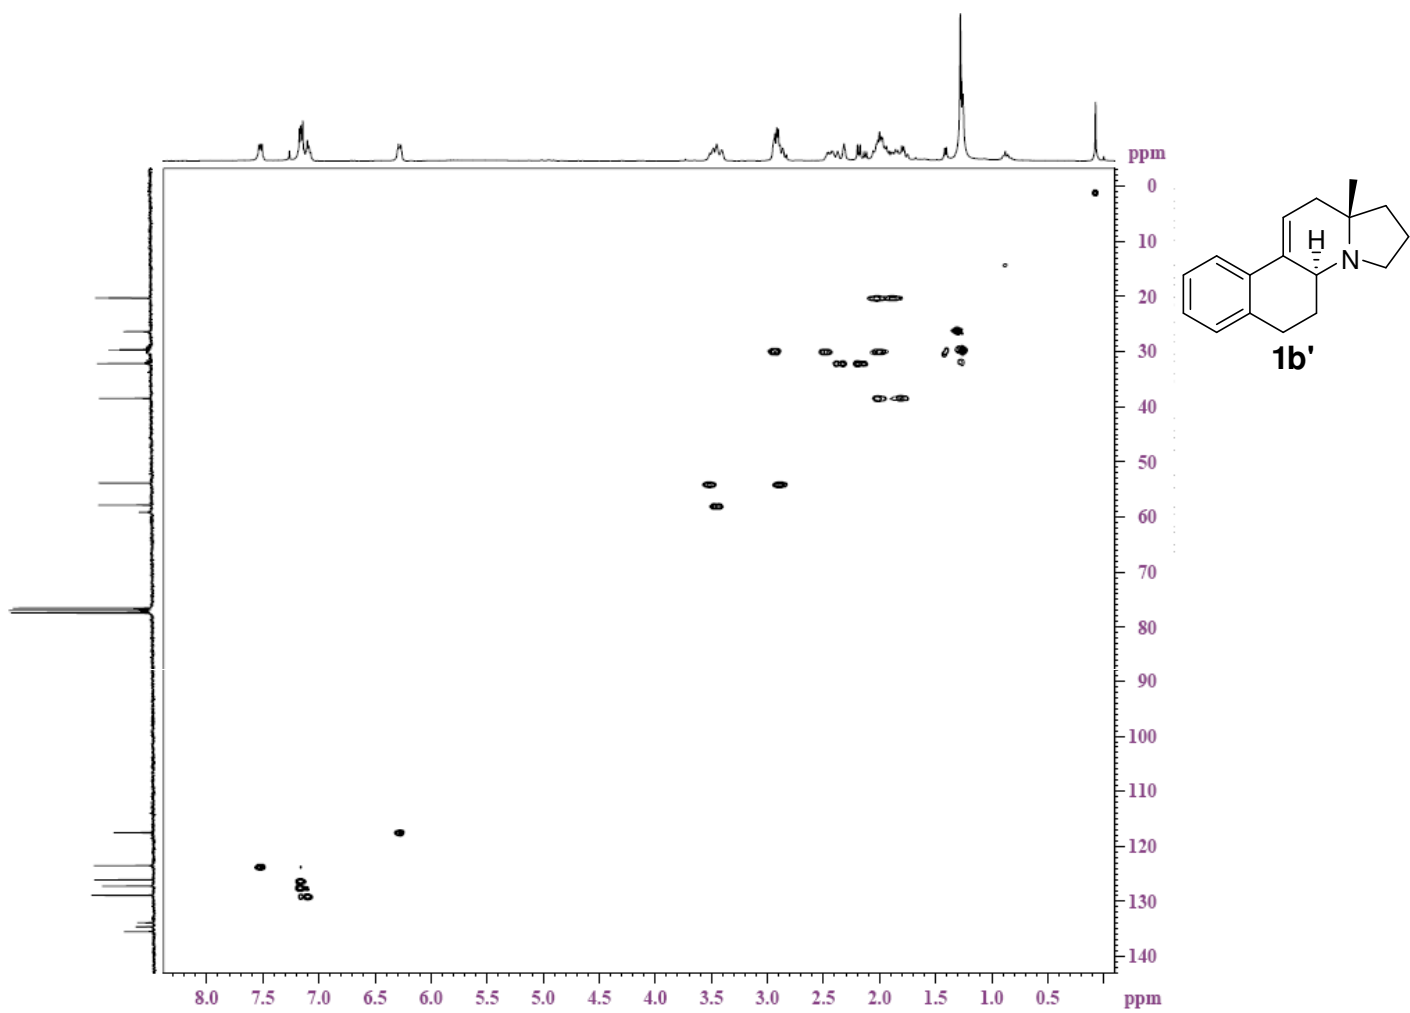

Fig.9 HSQC spectra of compound **1b'**

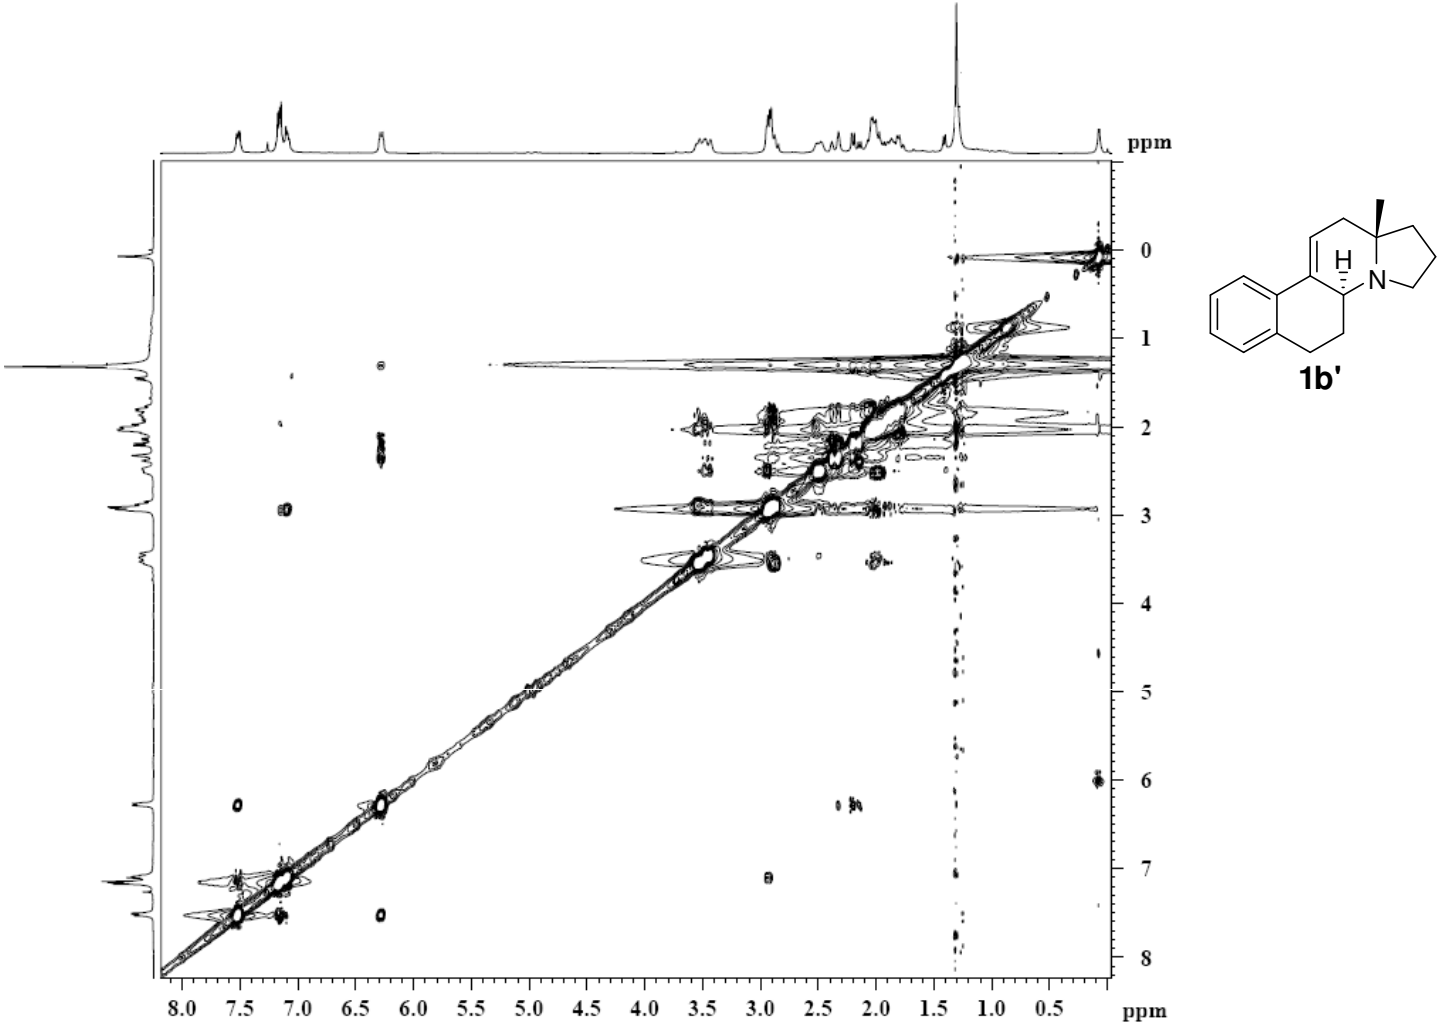

Fig.10 NOESY spectra of compound **1b'**

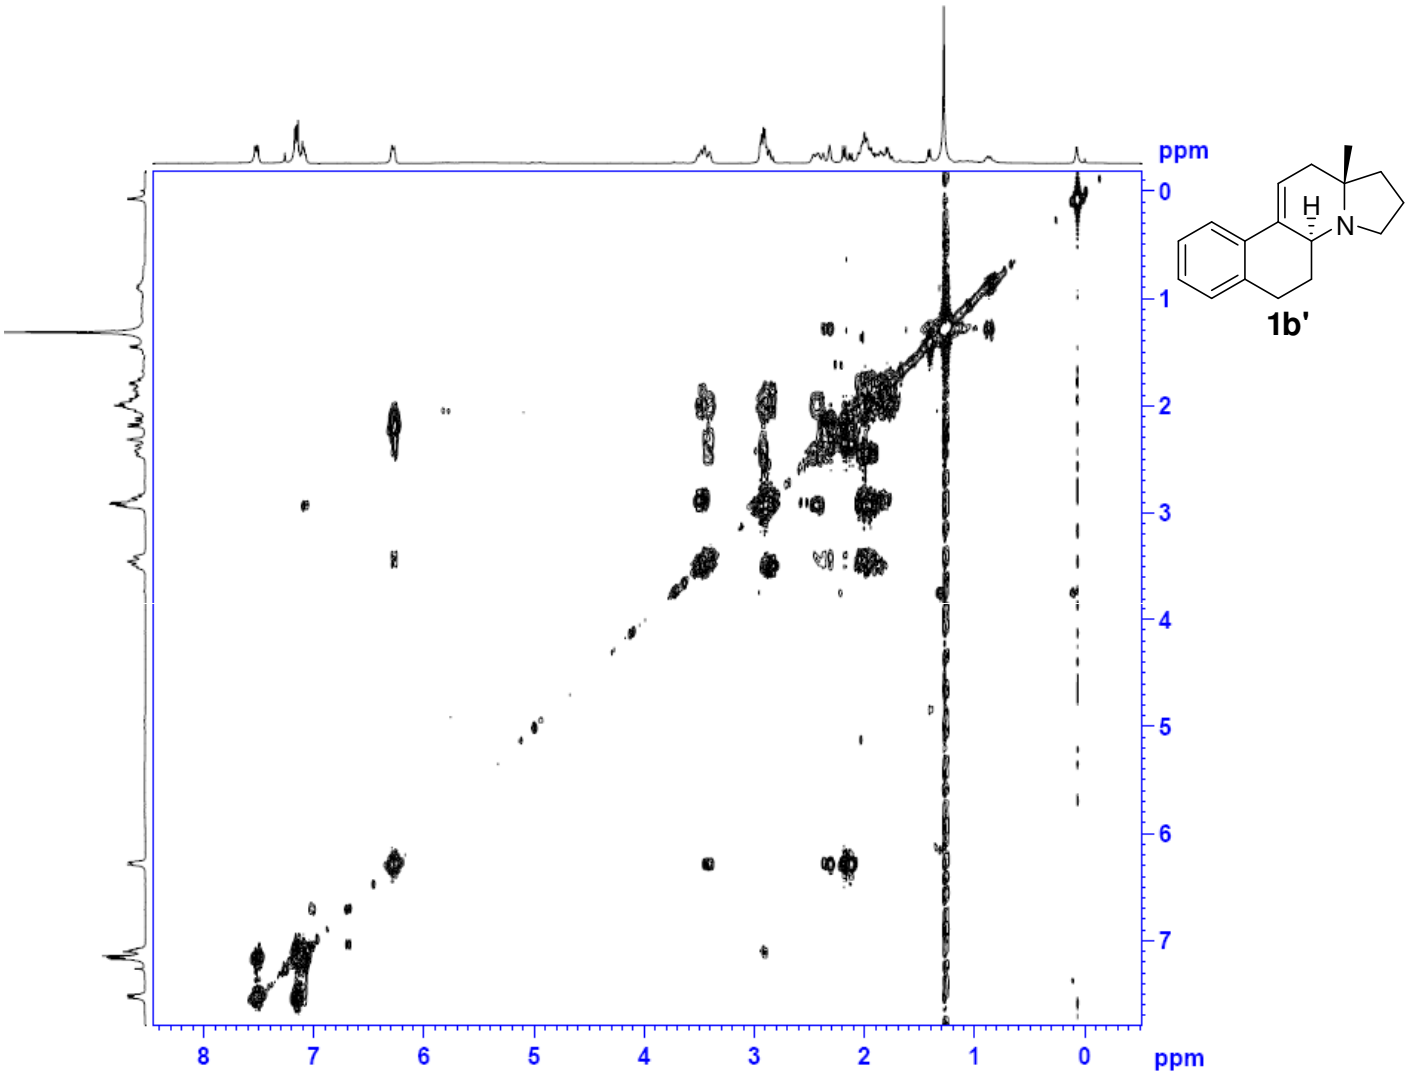

Fig.11 COSY spectra of compound **1b'**

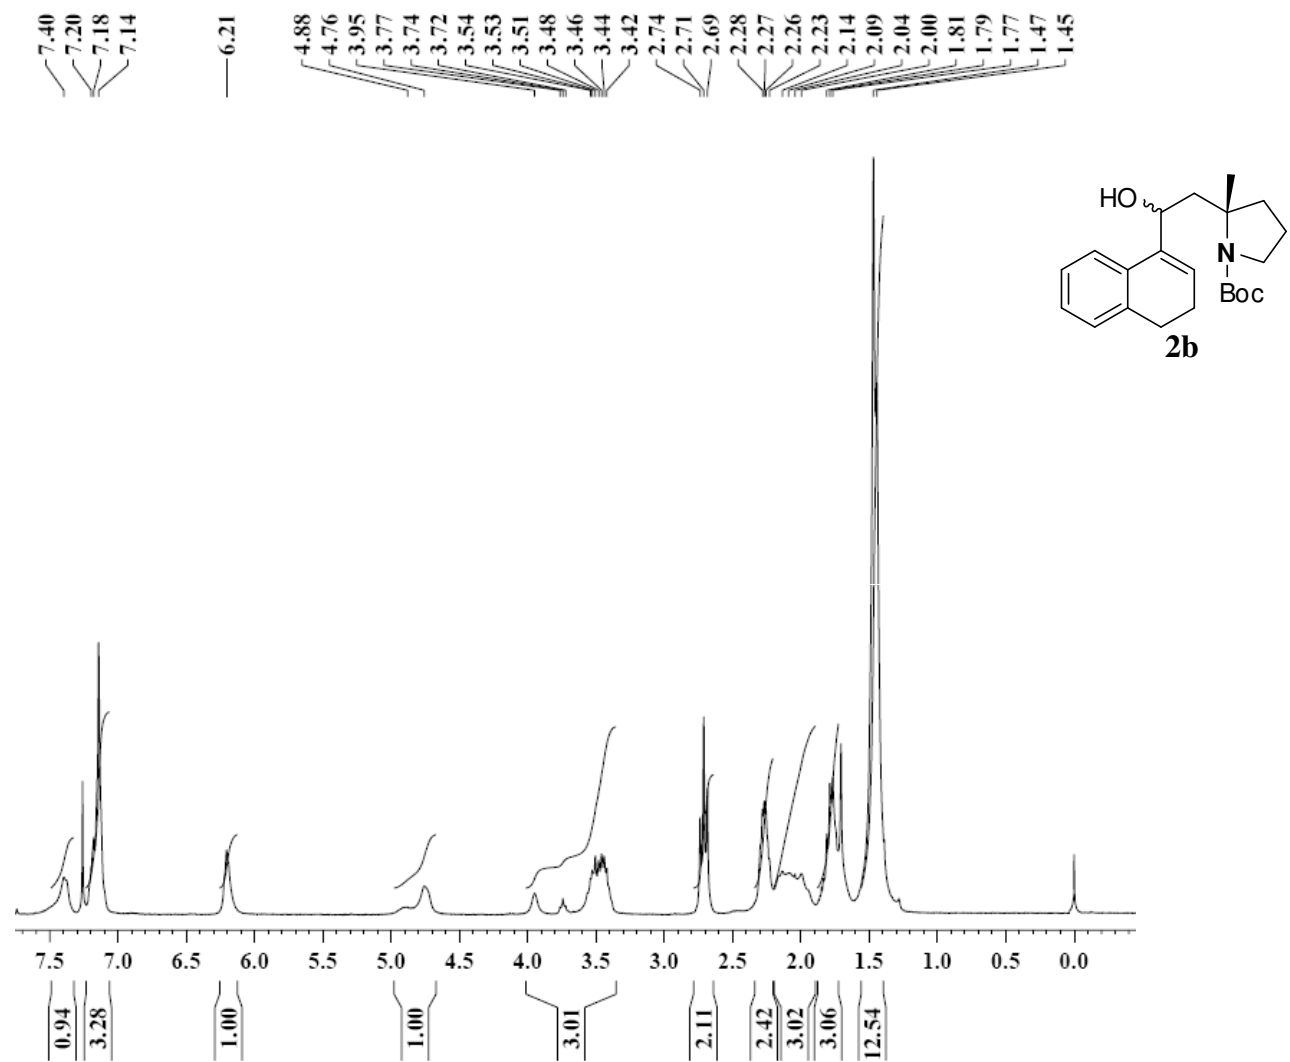

Fig.12 <sup>1</sup>H spectra of compound **2b**

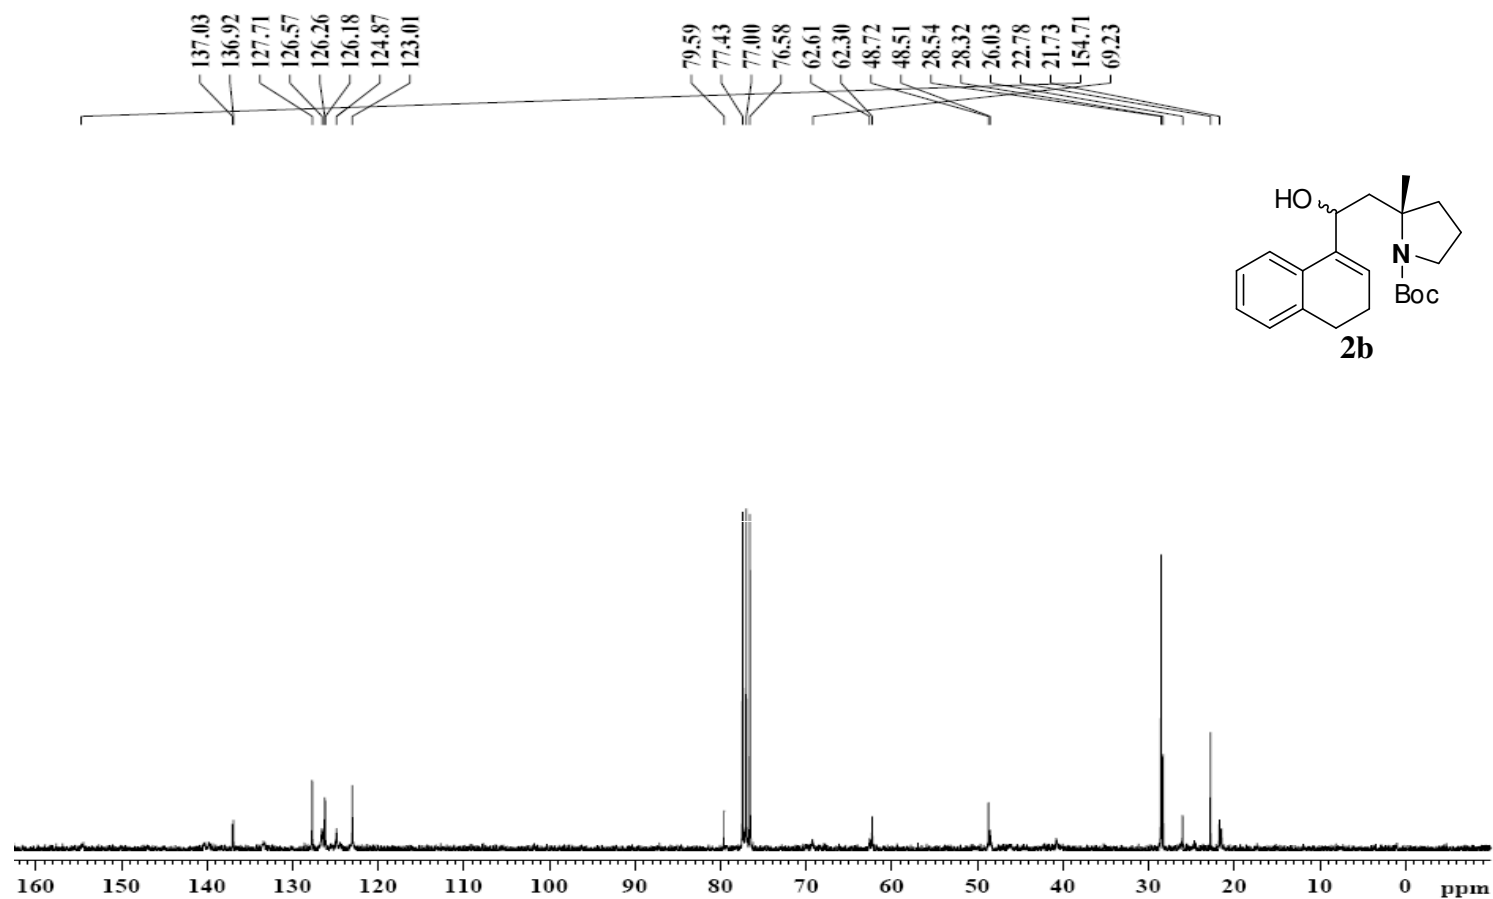

Fig.13  $^{13}\text{C}$  spectra of compound **2b**

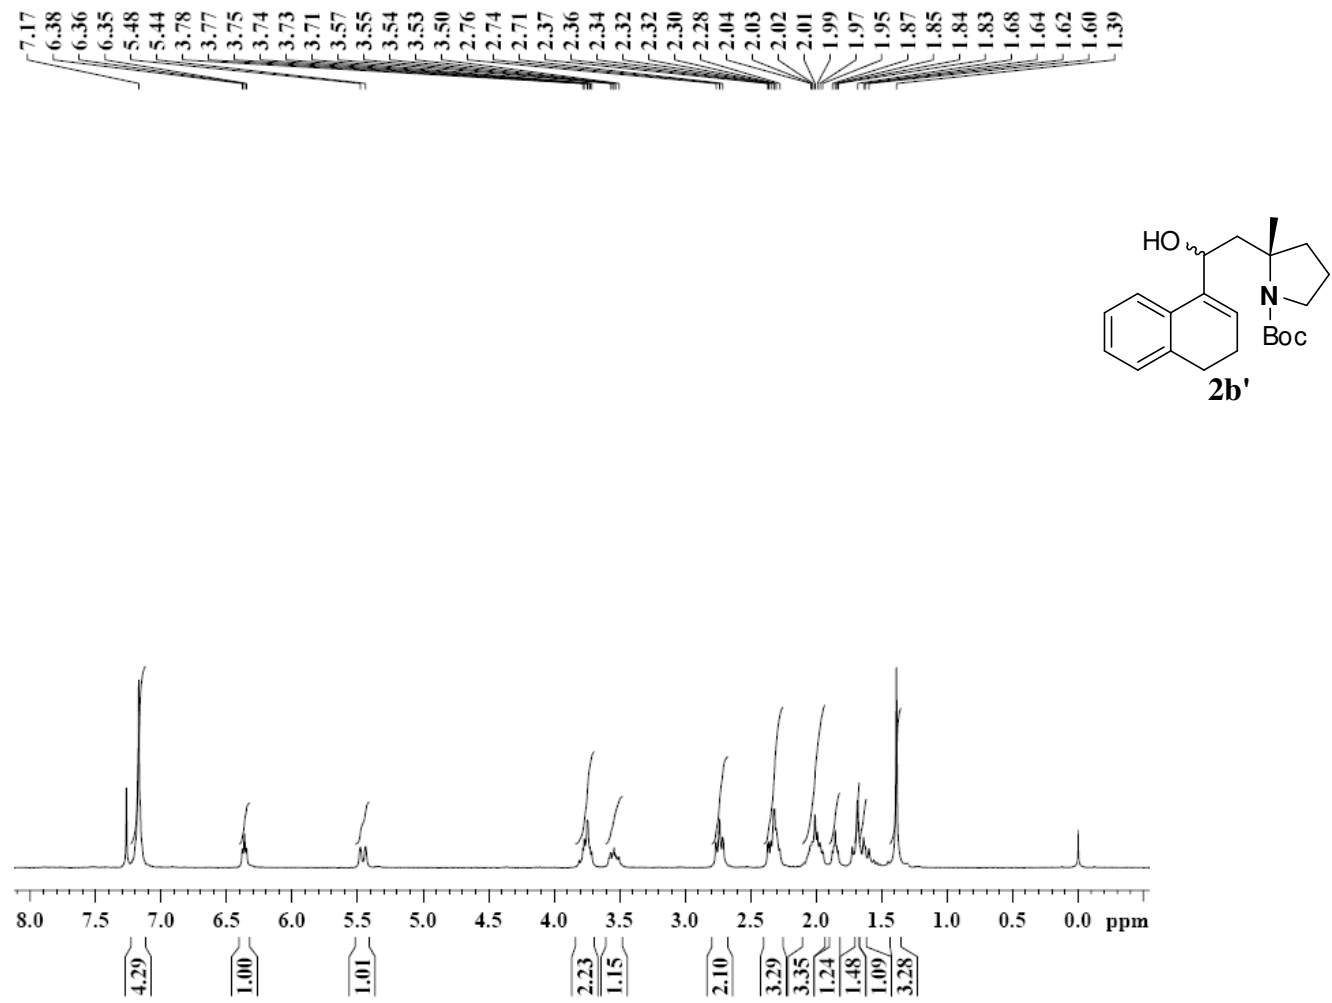

Fig.14 <sup>1</sup>H spectra of compound **2b'**

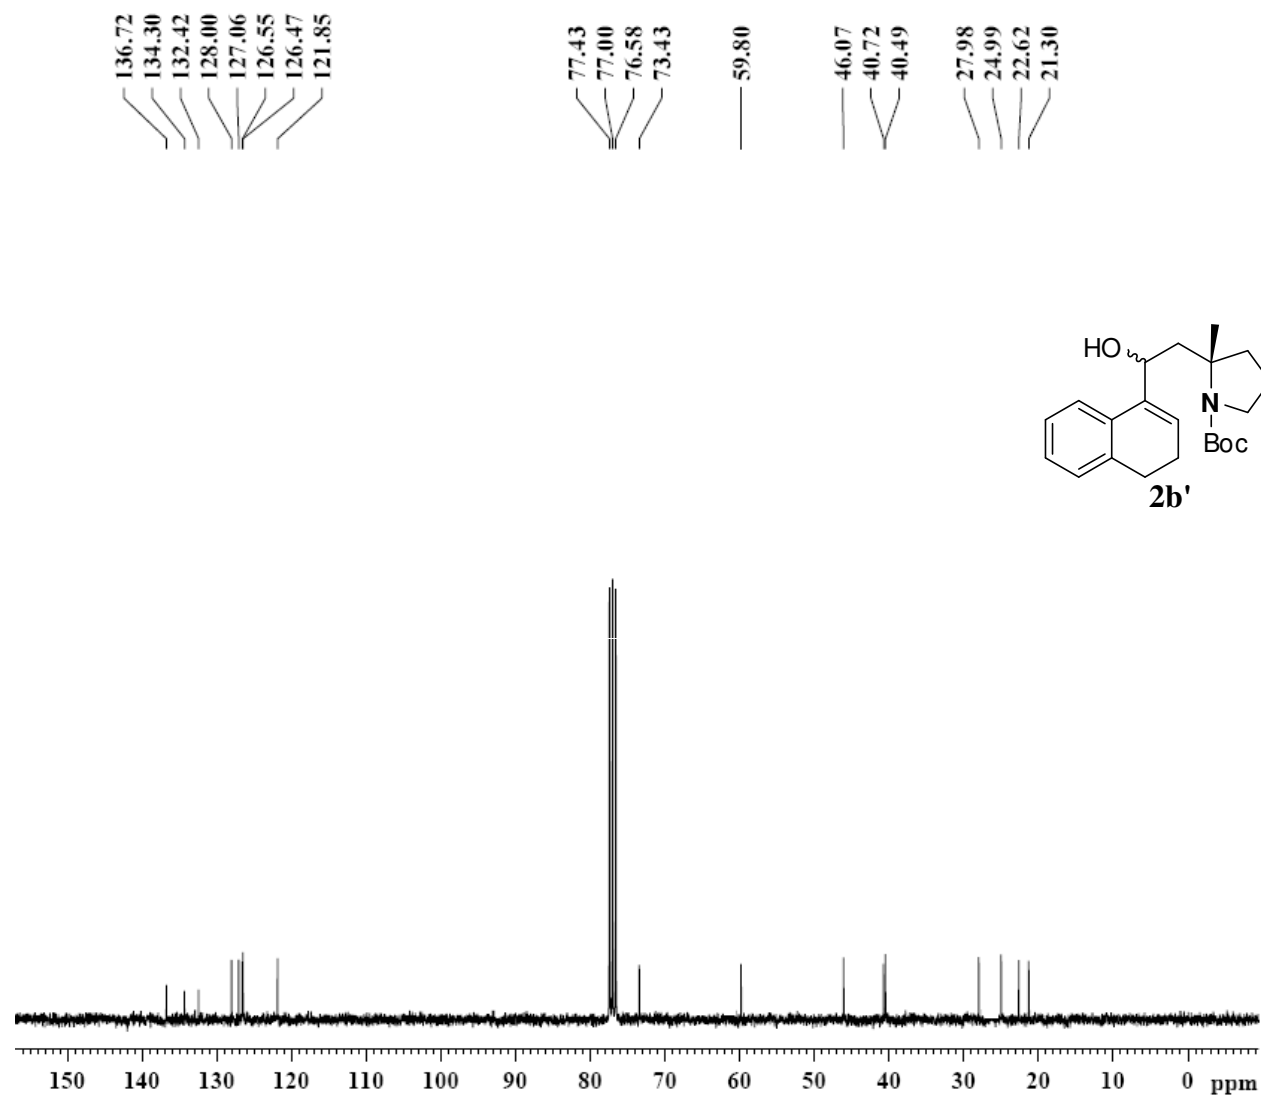

Fig.15  $^{13}\text{C}$  spectra of compound **2b'**

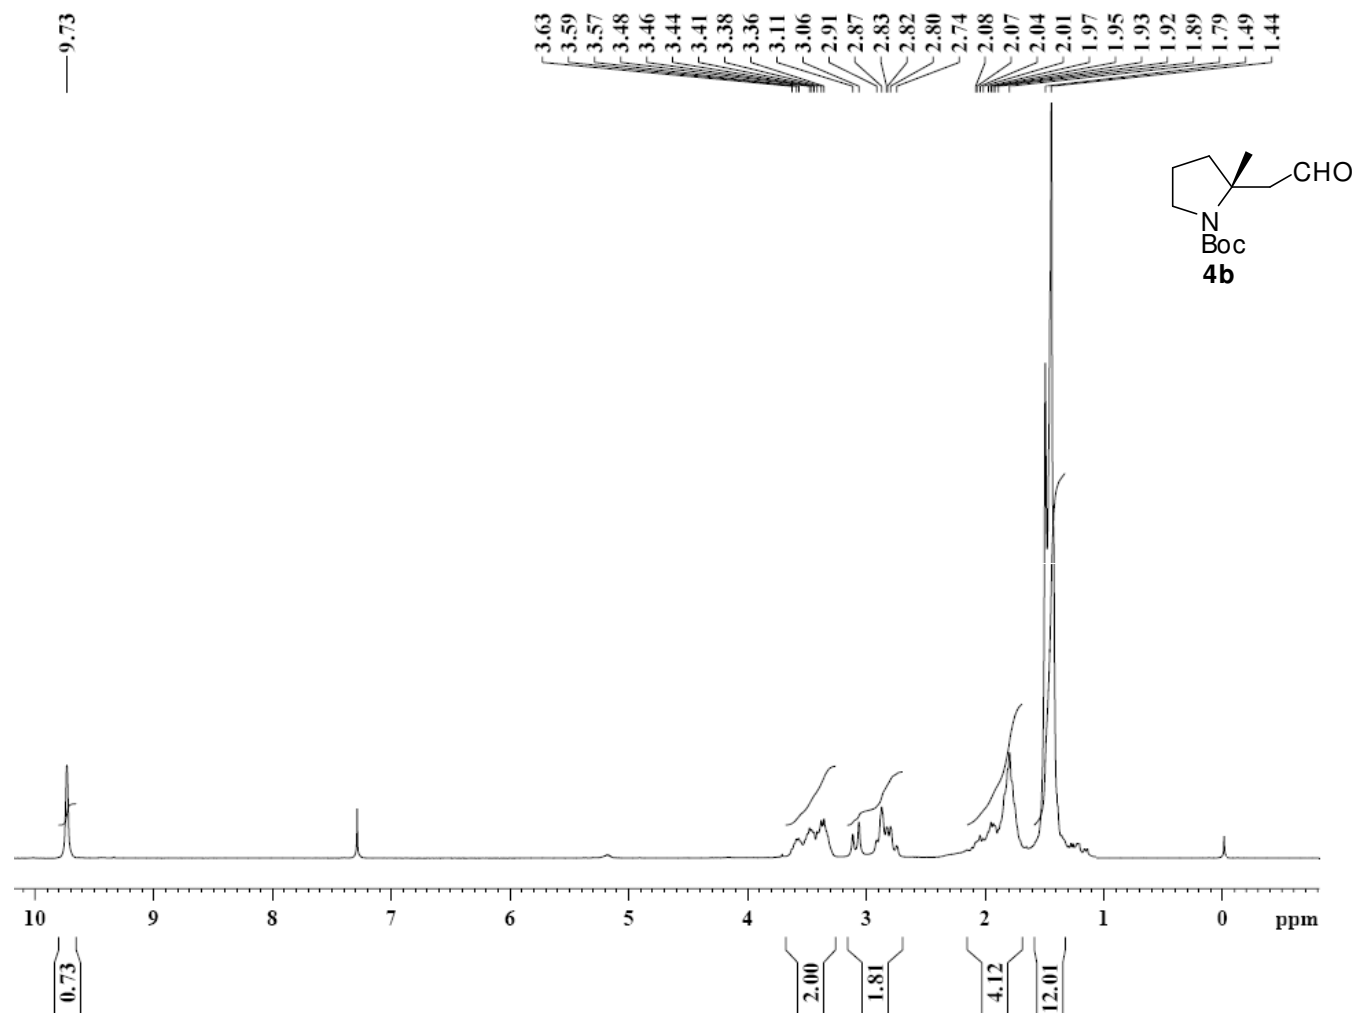

Fig.16 <sup>1</sup>H spectra of compound **4b**

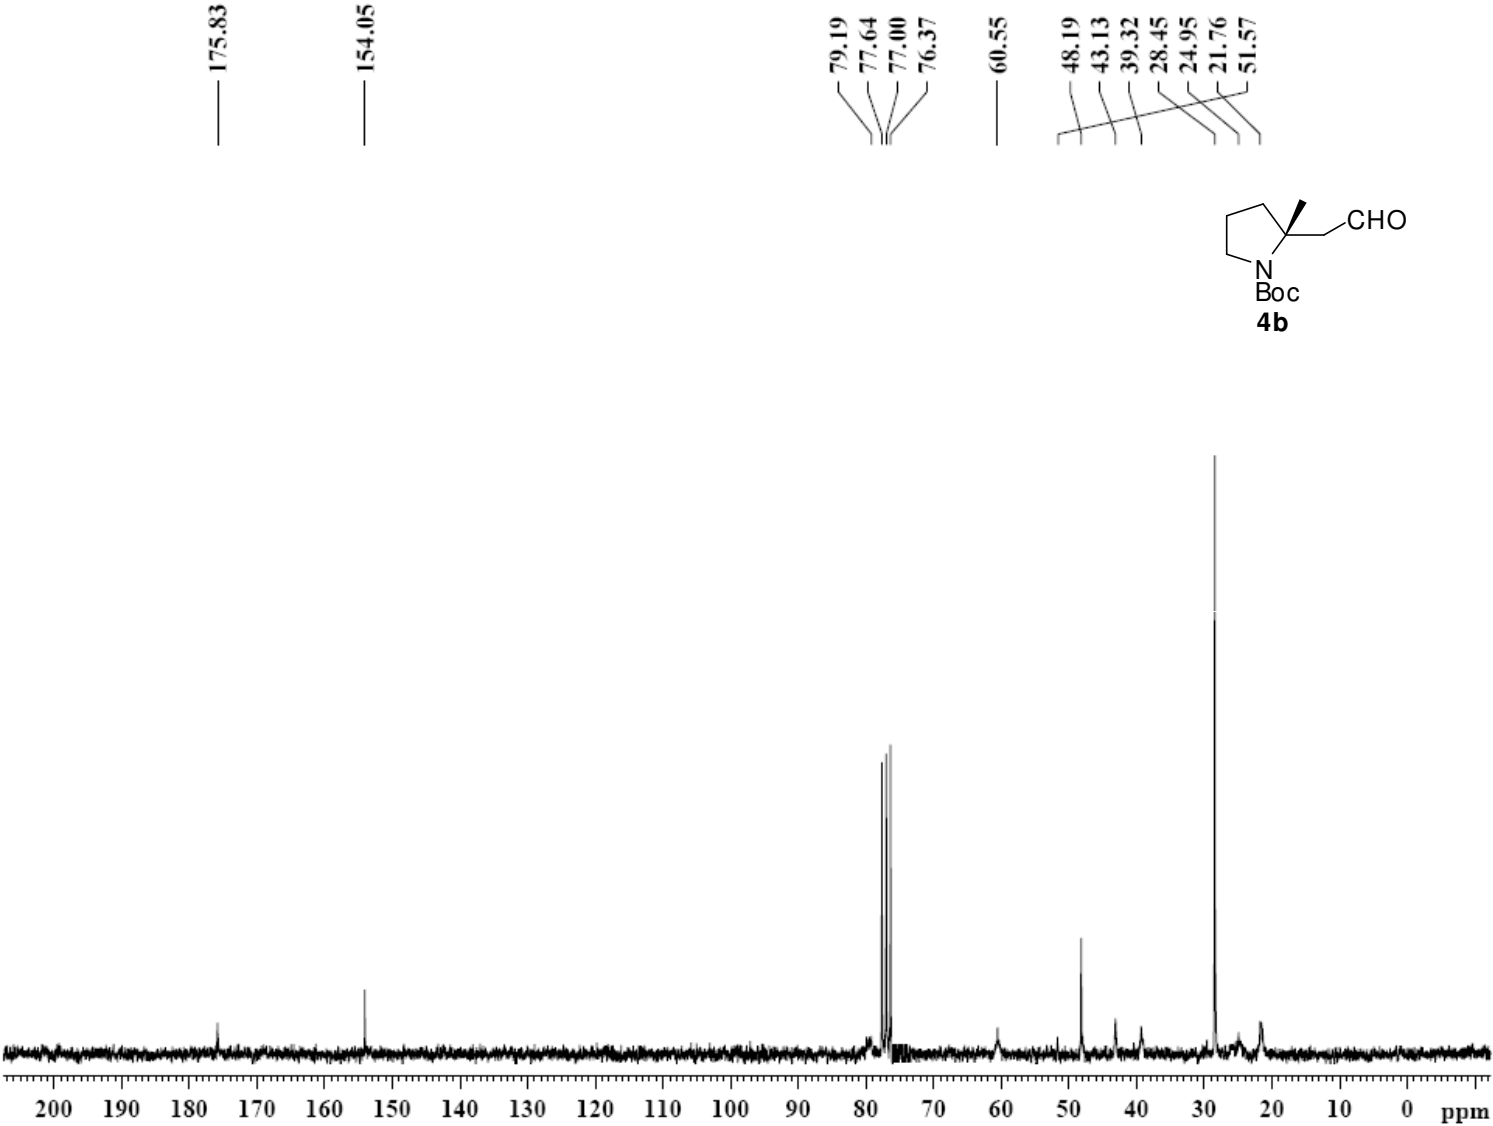

Fig.17 <sup>13</sup>C spectra of compound **4b**

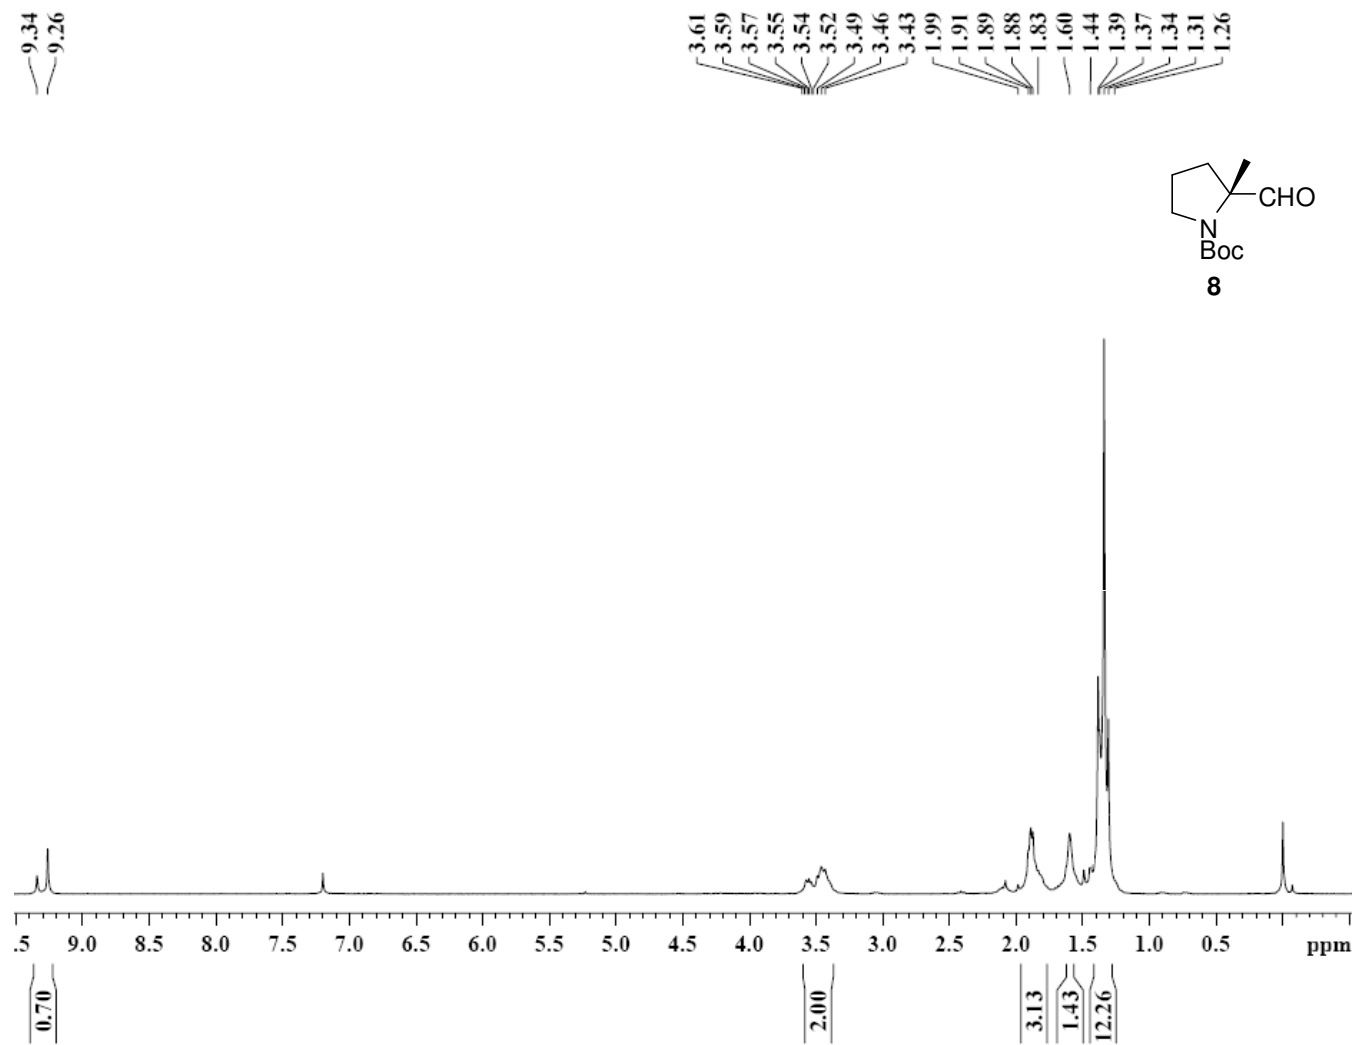

Fig.18 <sup>1</sup>H spectra of compound **8**

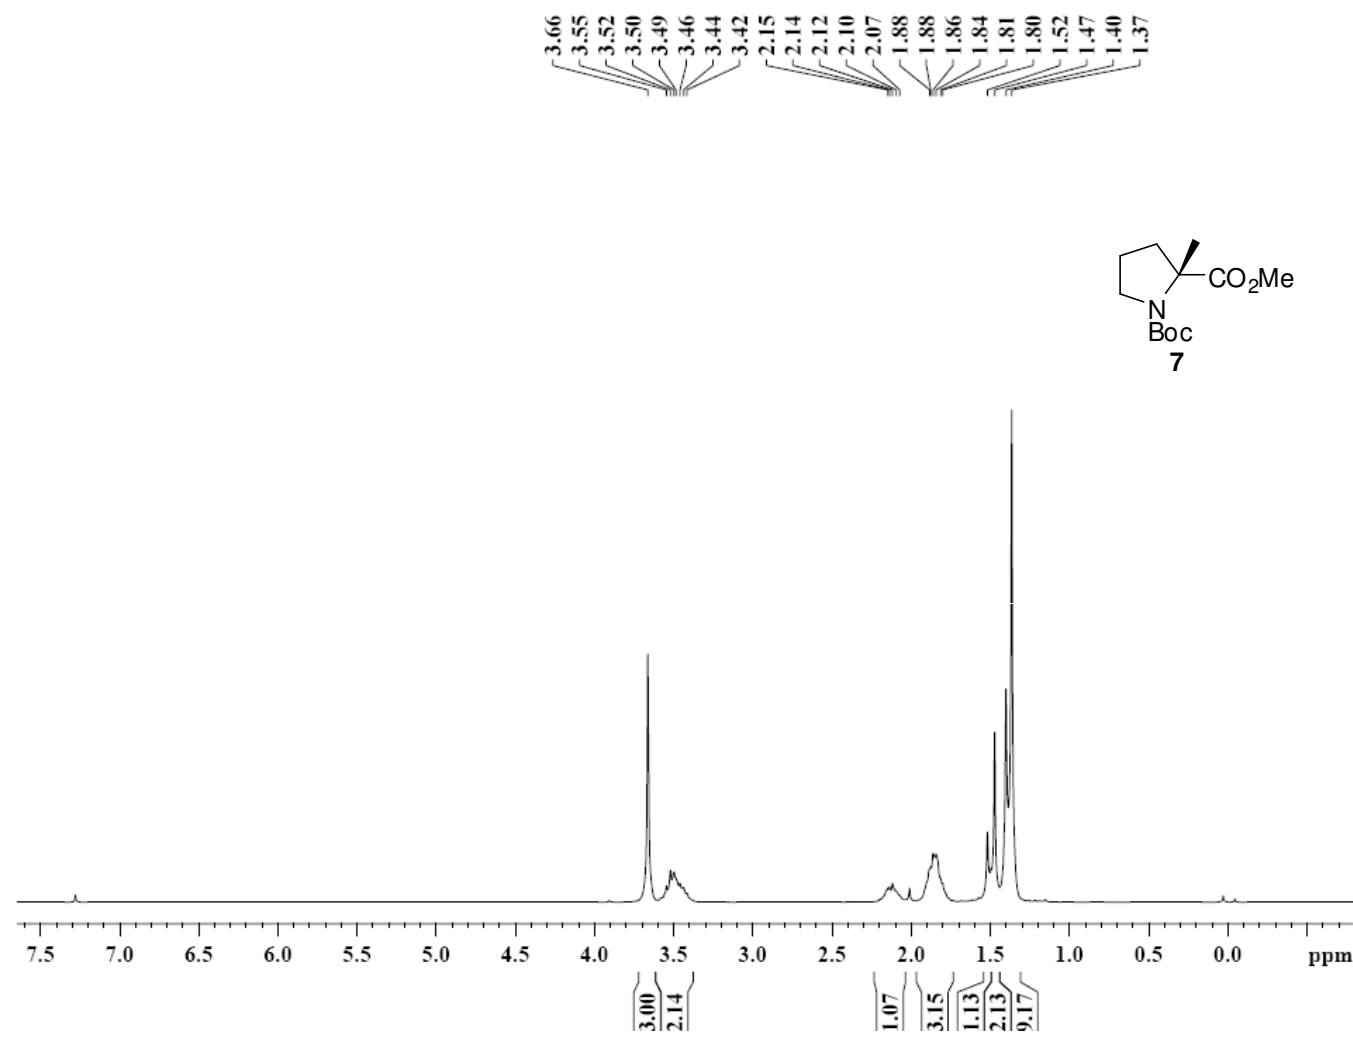

Fig.19 <sup>1</sup>H spectra of compound 7

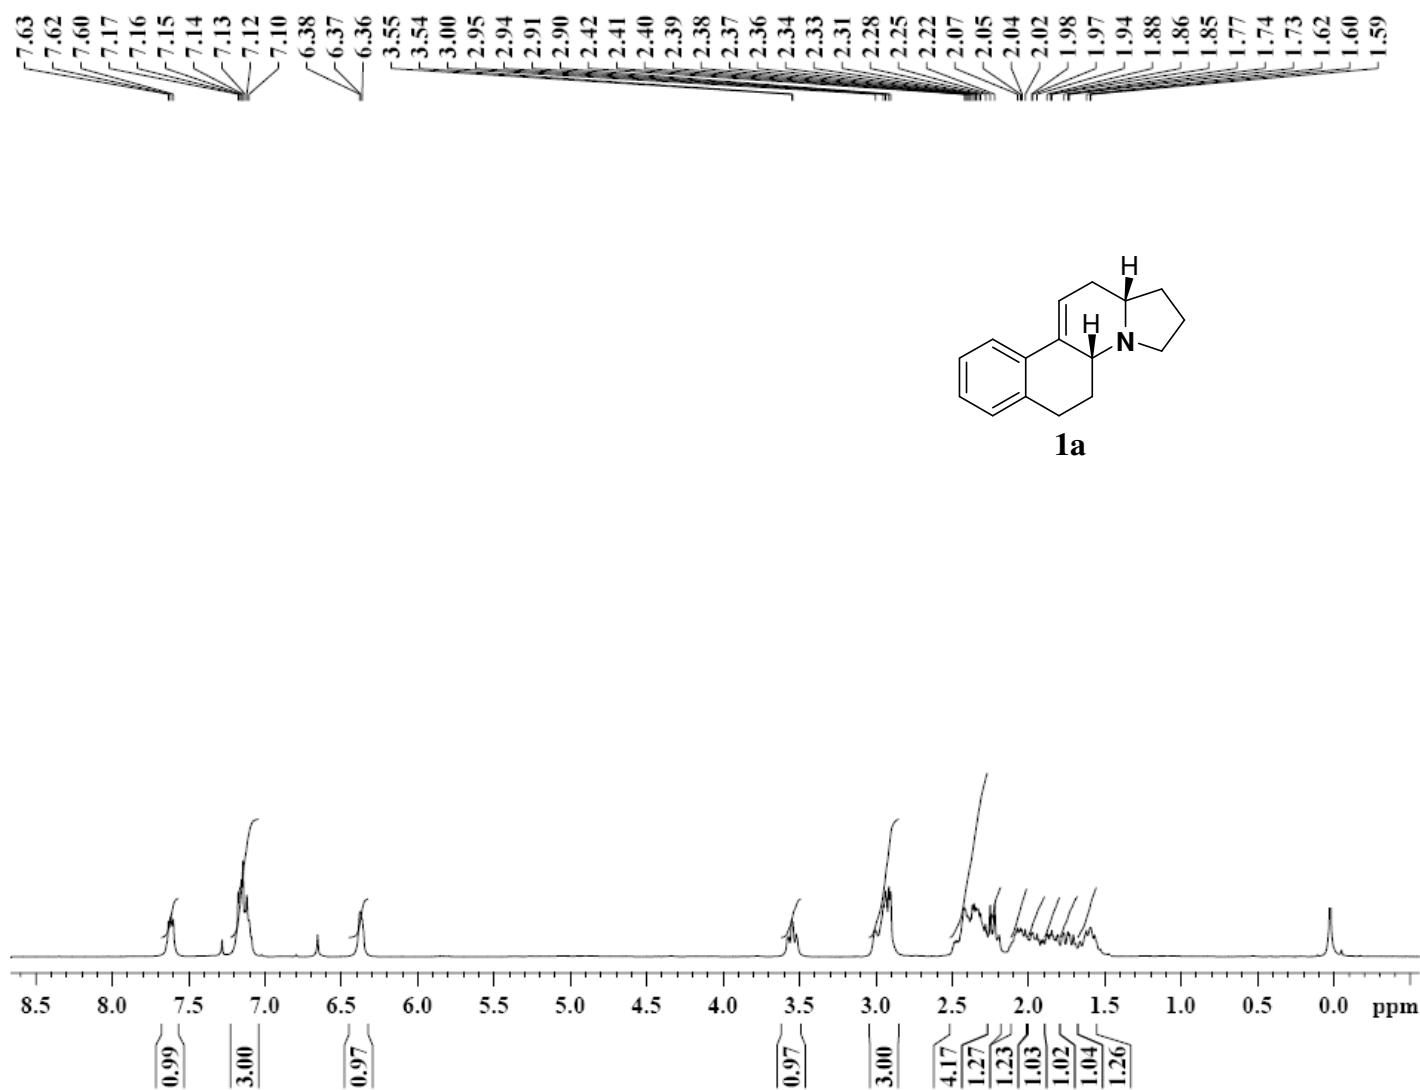

Fig.20 <sup>1</sup>H spectra of compound **1a**

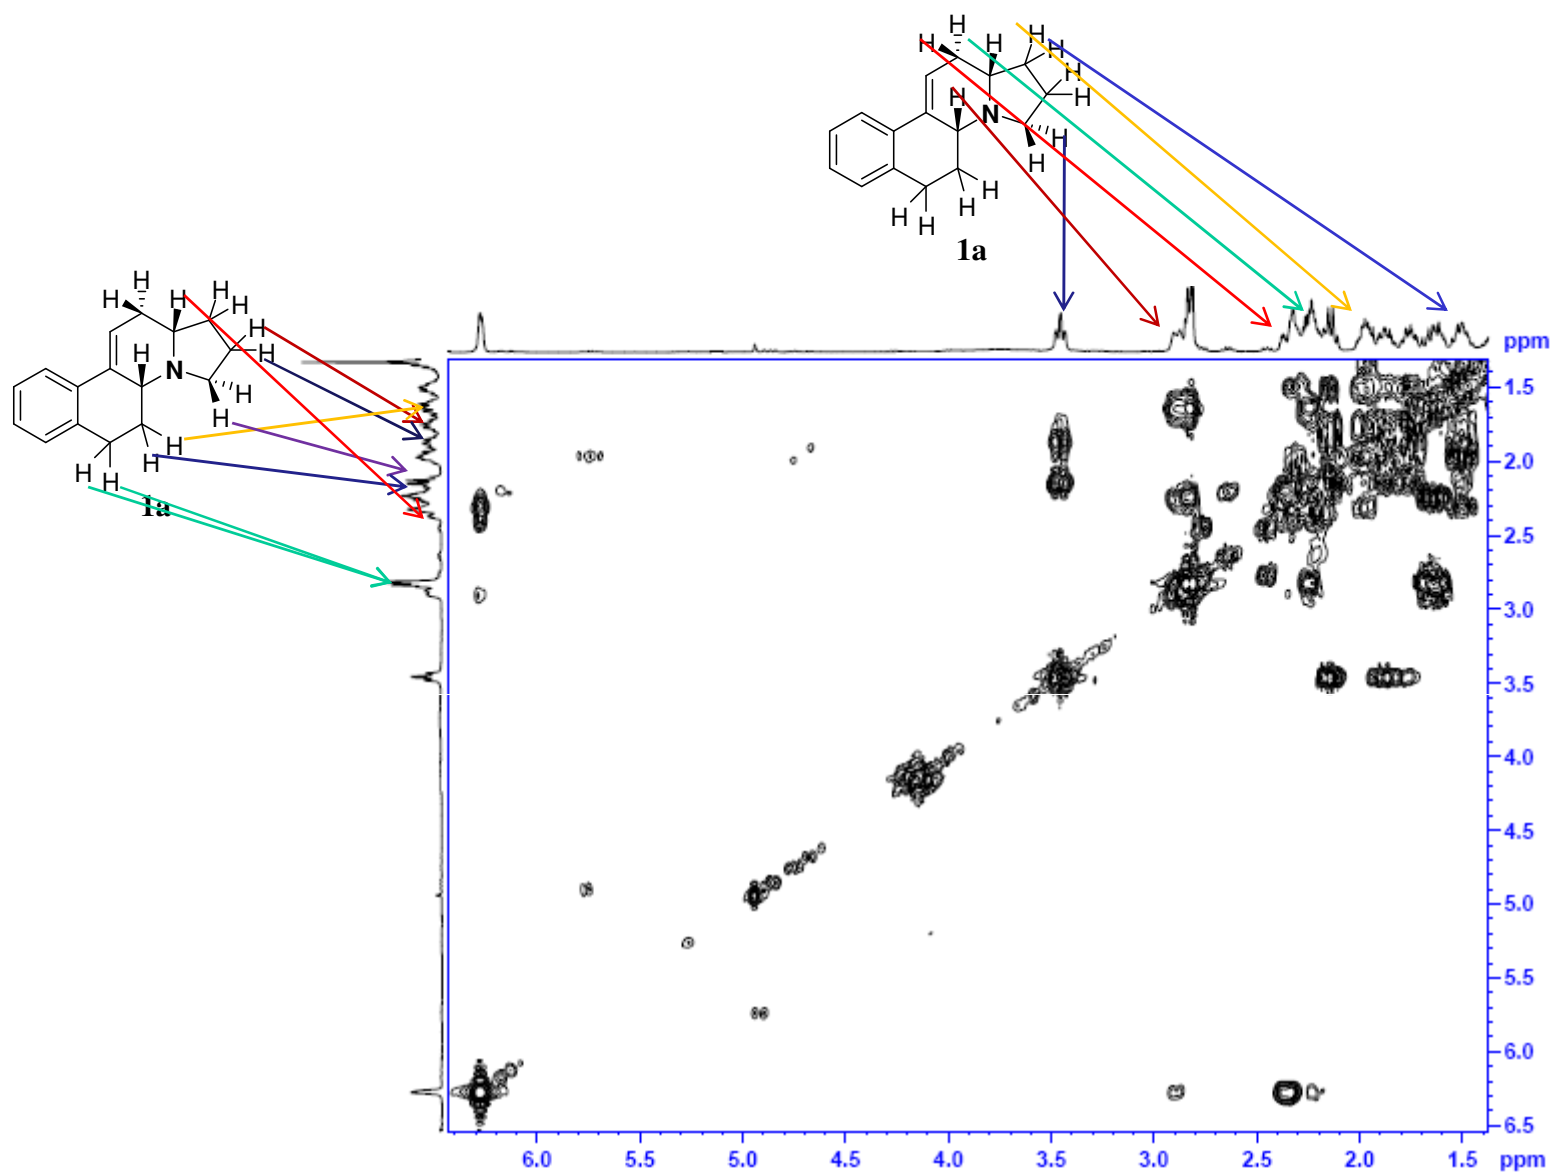

Fig.21 COSY(1-7 ppm) spectra of compound **1a**

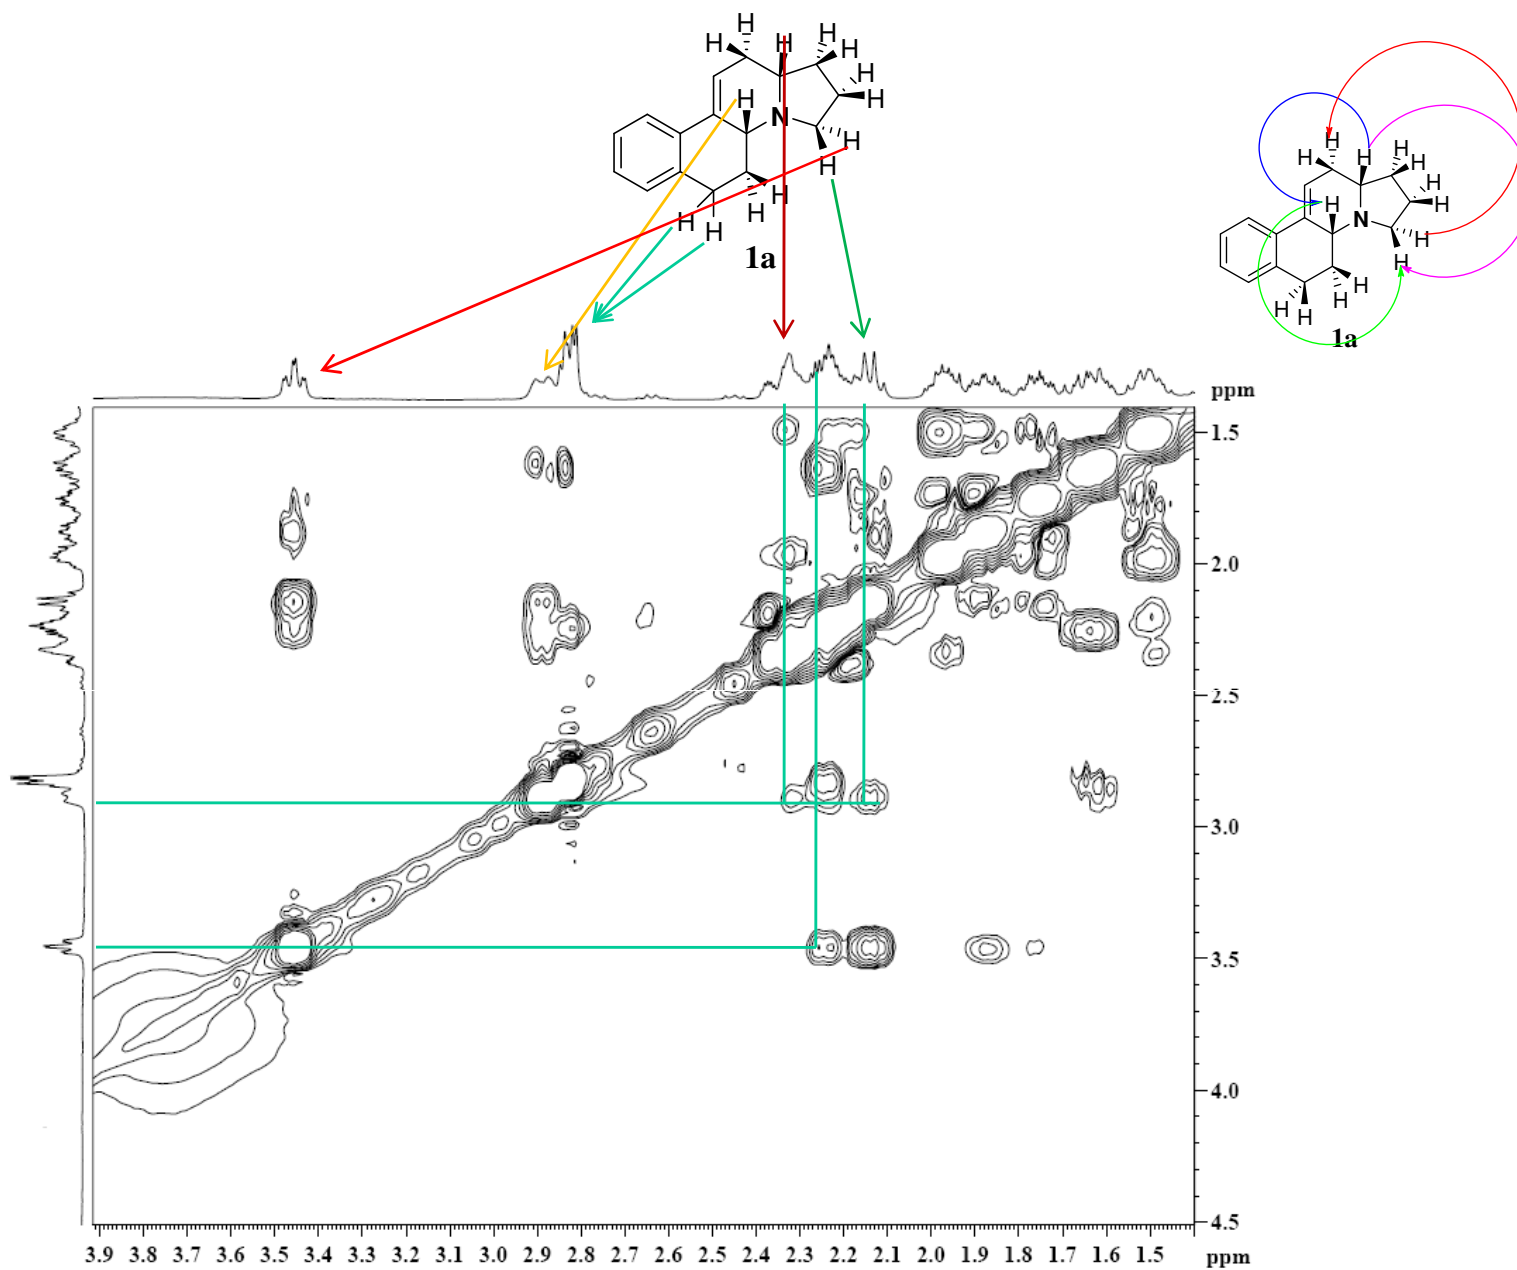

Fig 22. NOESY (1.5- 4 ppm) spectra of compound **1a**

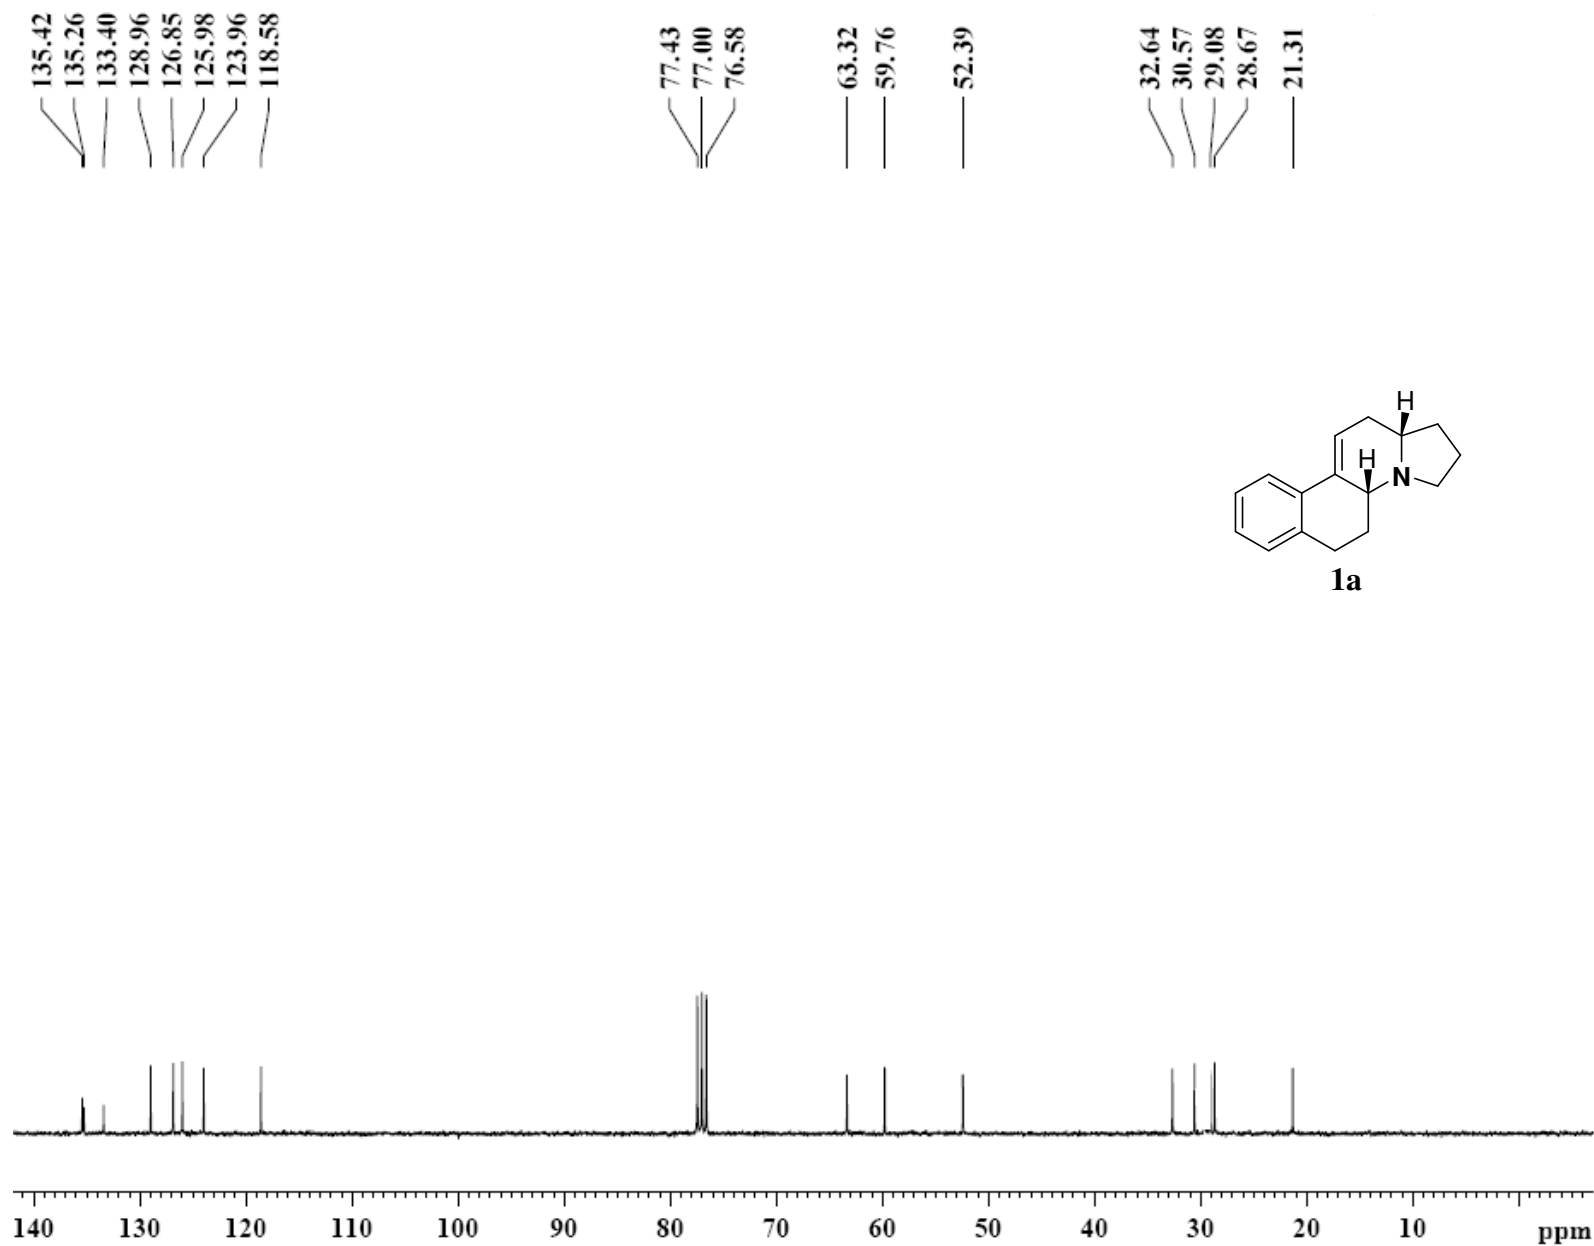

Fig.23  $^{13}\text{C}$  spectra of compound **1a**

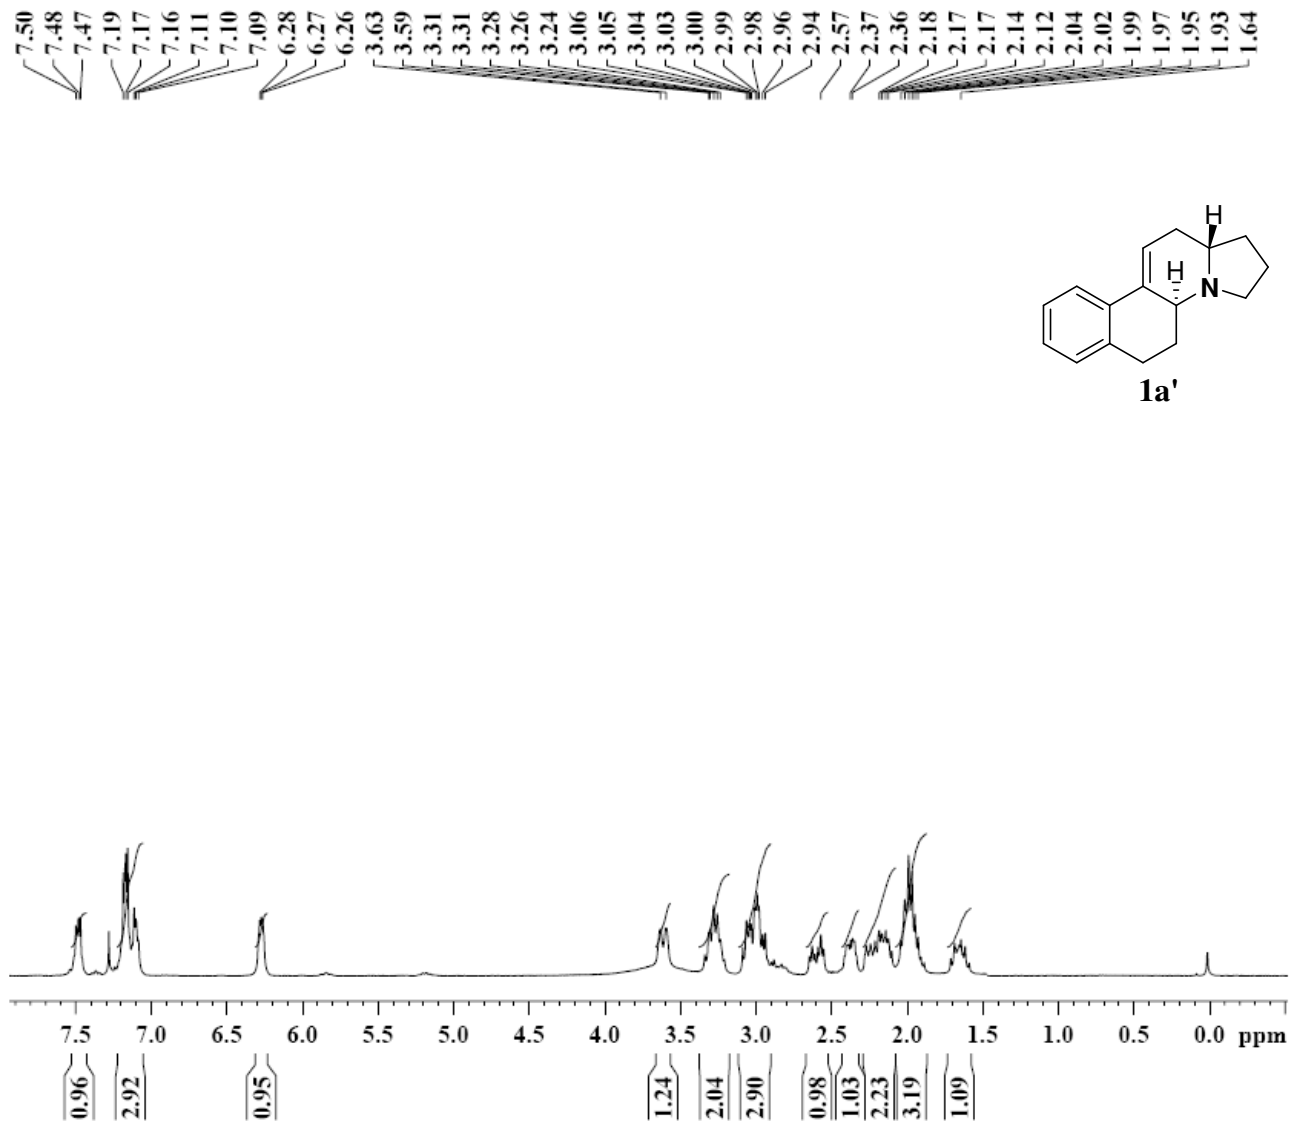

Fig.24 <sup>1</sup>H spectra of compound **1a'**

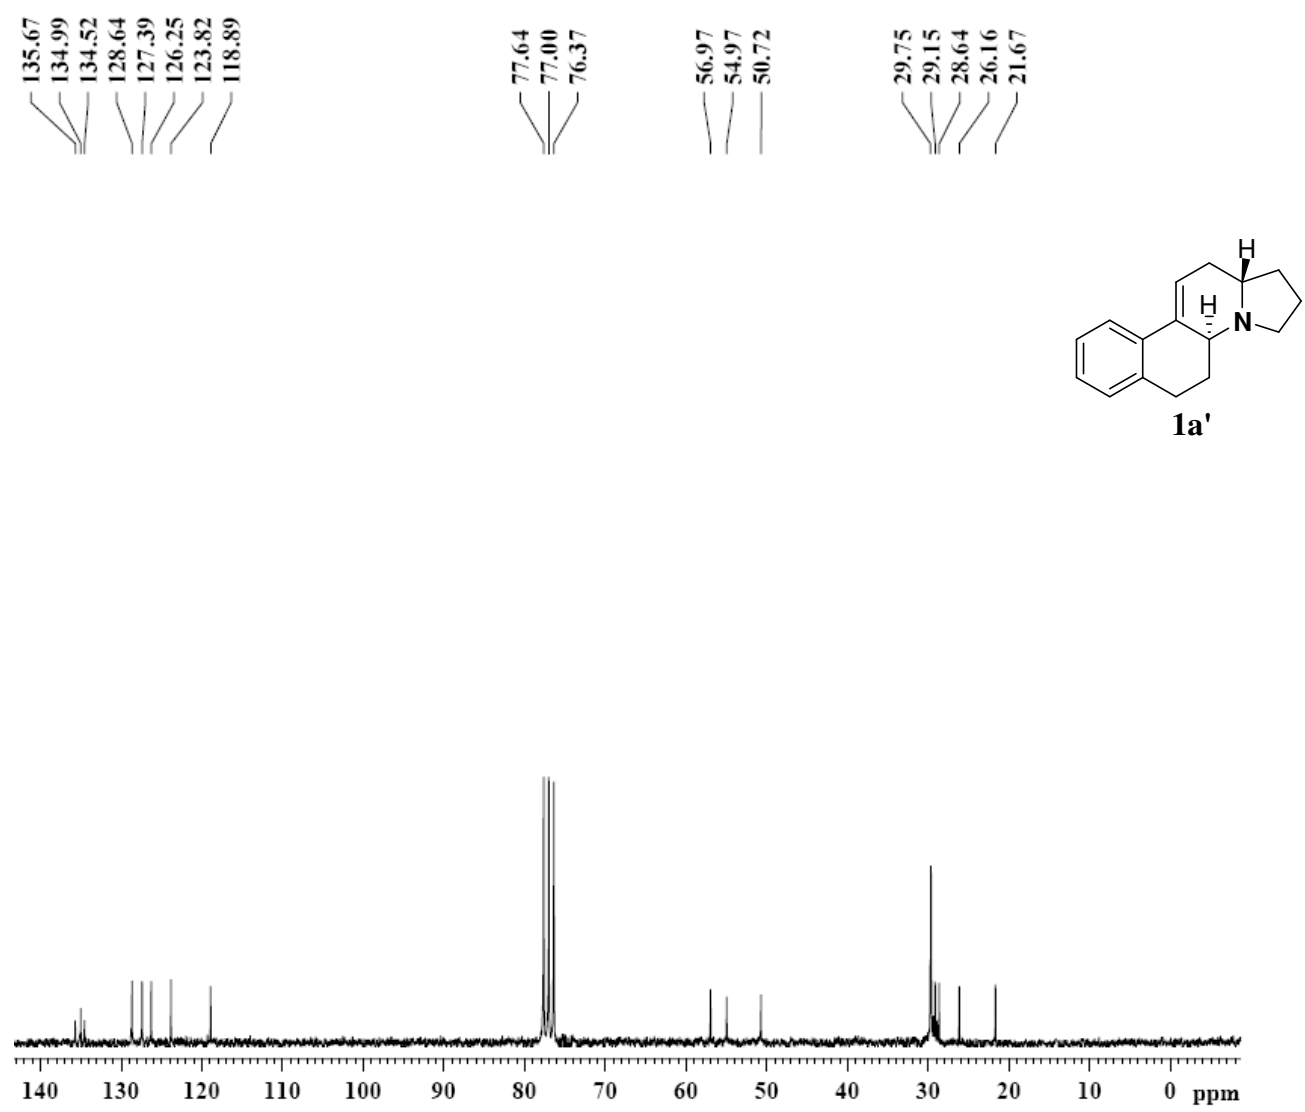

Fig.25 <sup>13</sup>C spectra of compound **1a'**

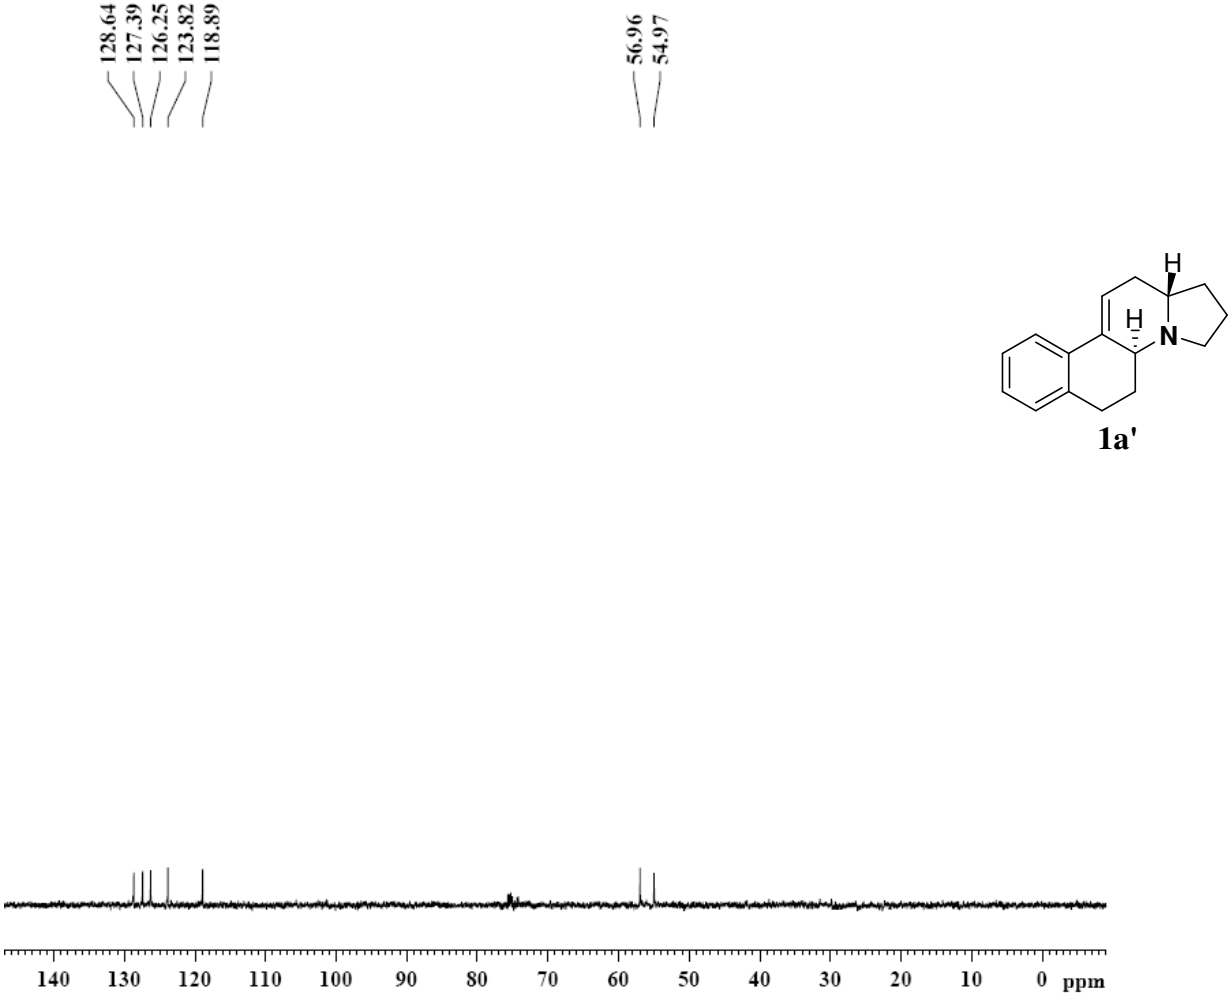

Fig.26 DEPT 90 spectra of compound **1a'**

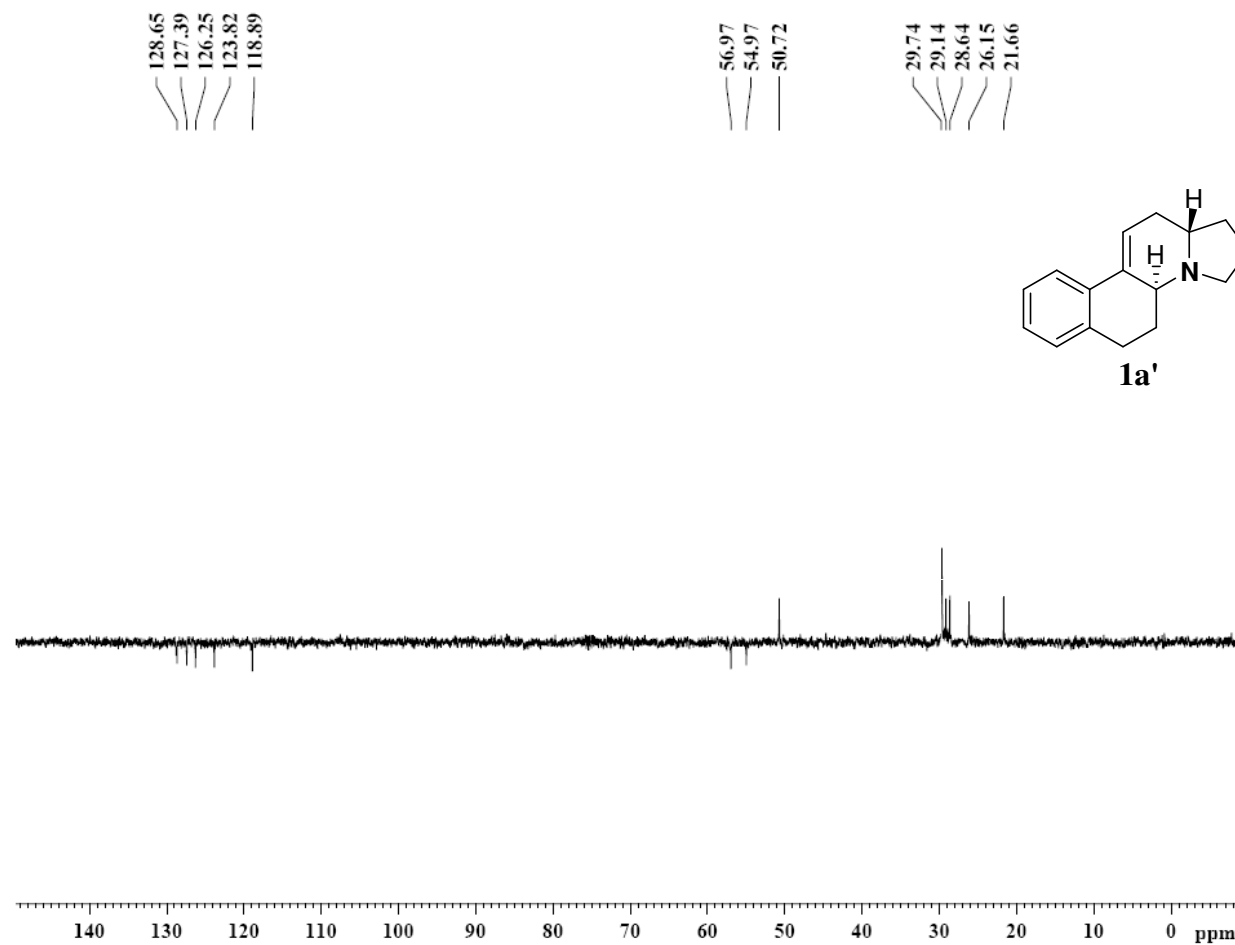

Fig.27 DEPT 135 spectra of compound **1a'**

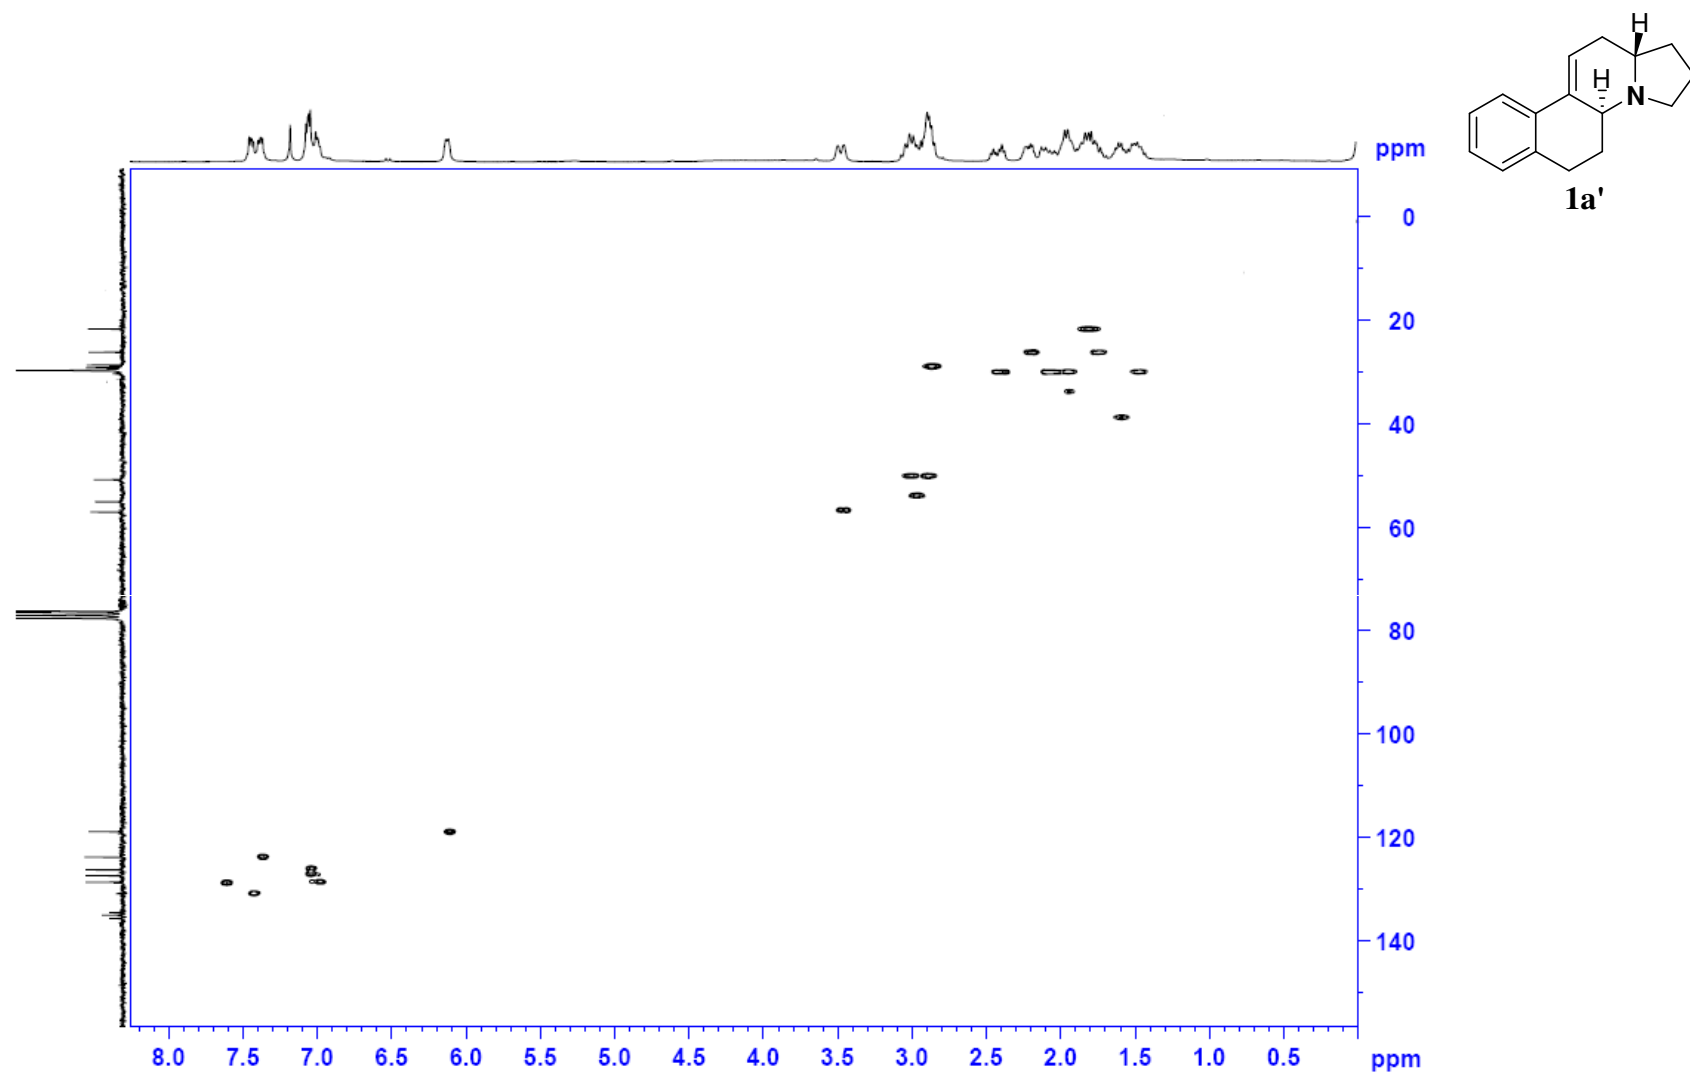

Fig.28 HSQC spectra of compound **1a'**

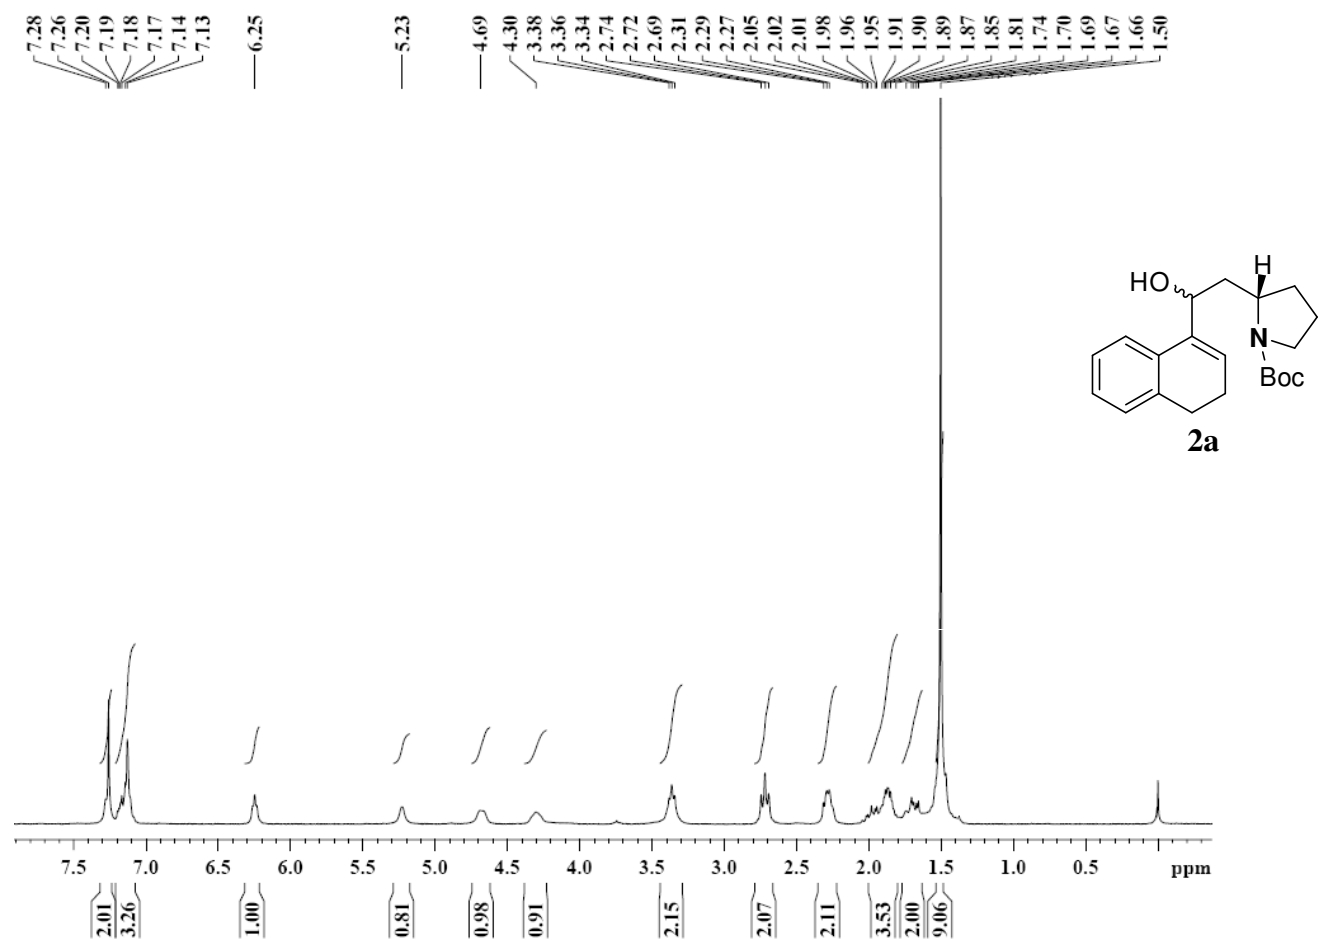

Fig.29  $^1\text{H}$  spectra of compound **2a**

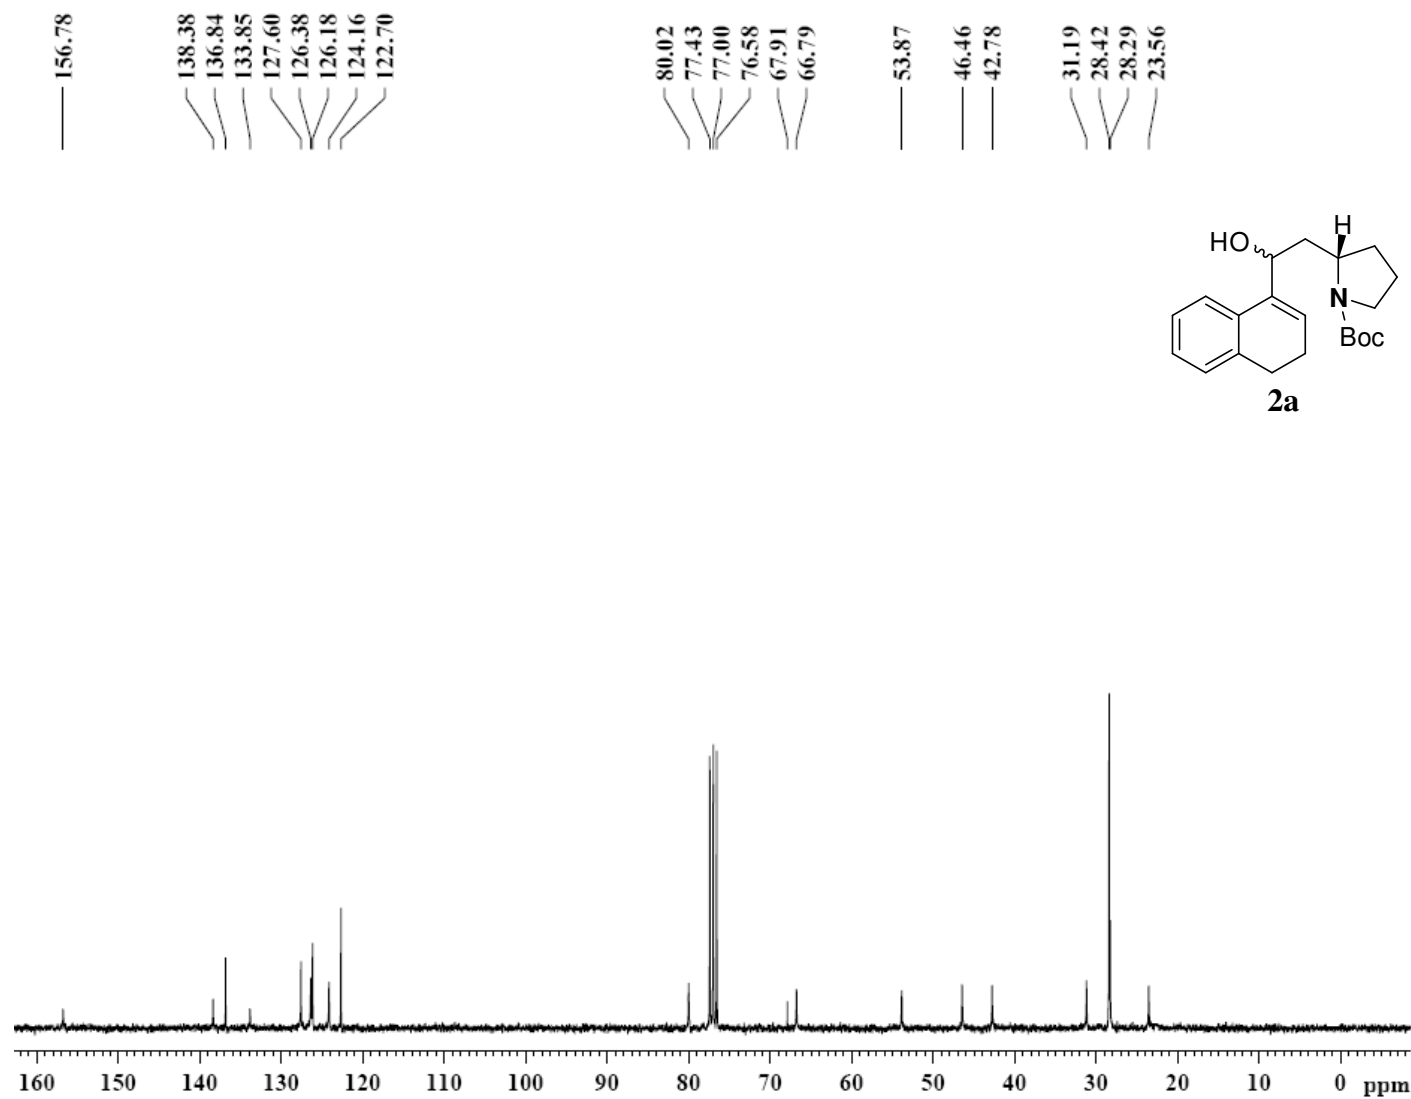

Fig.30 <sup>13</sup>C spectra of compound **2a**

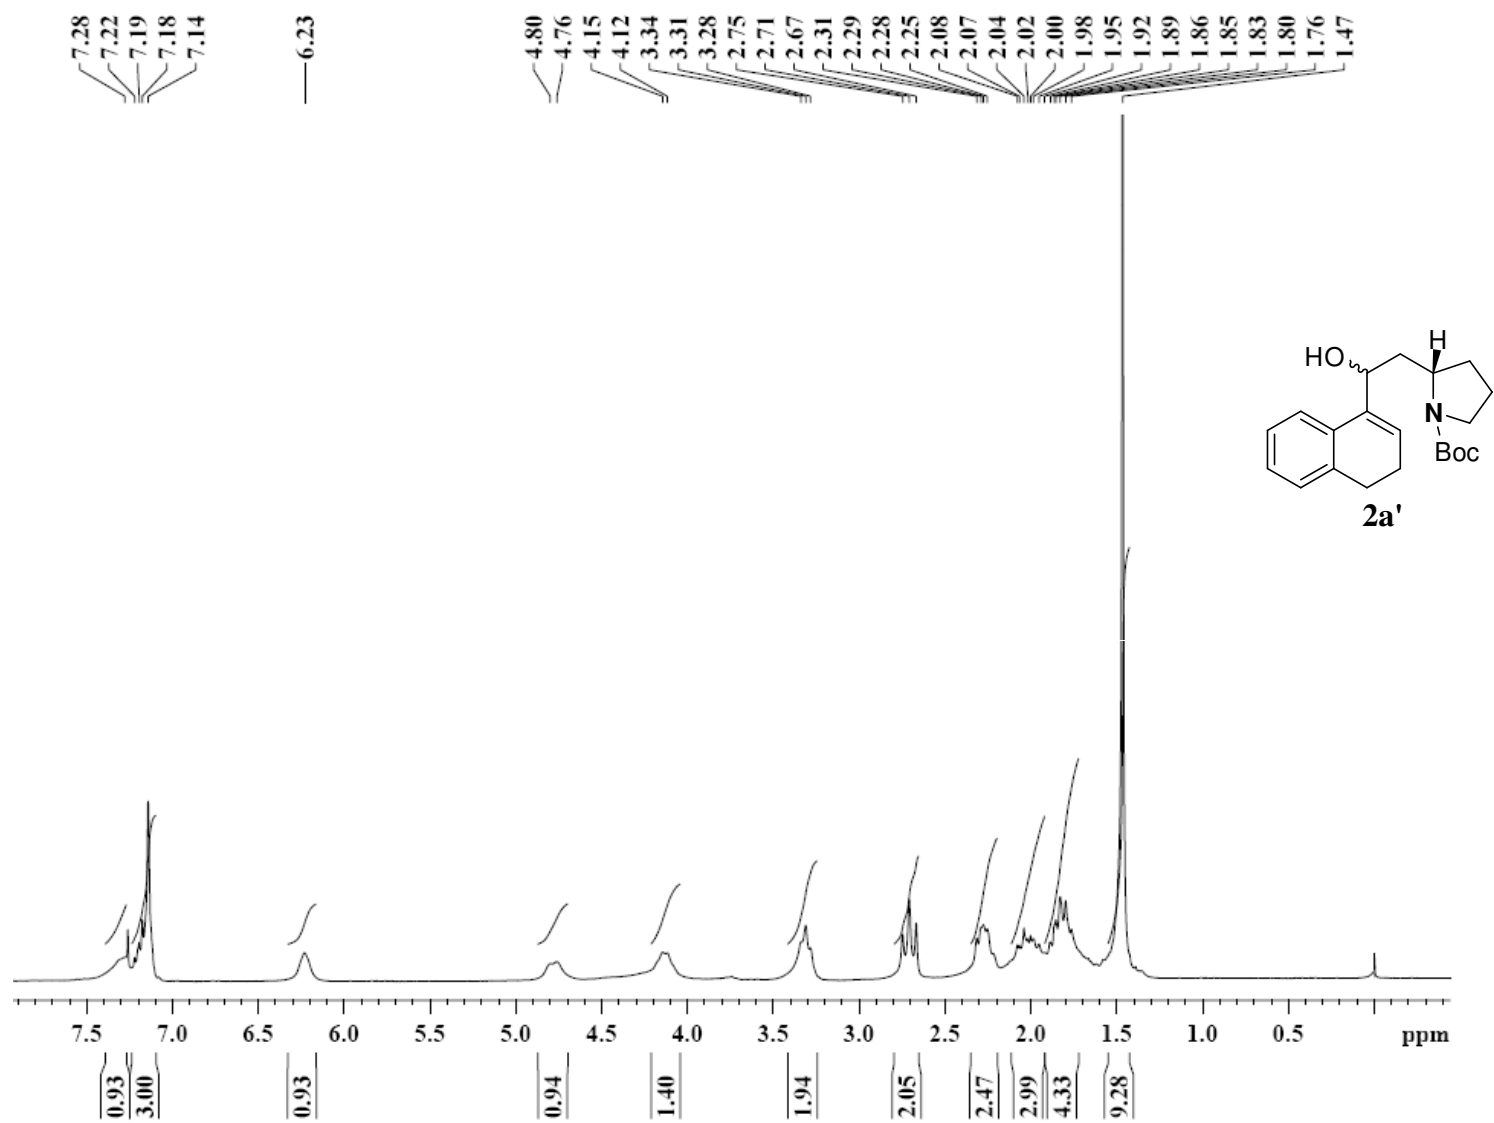

Fig.31 <sup>1</sup>H spectra of compound **2a'**

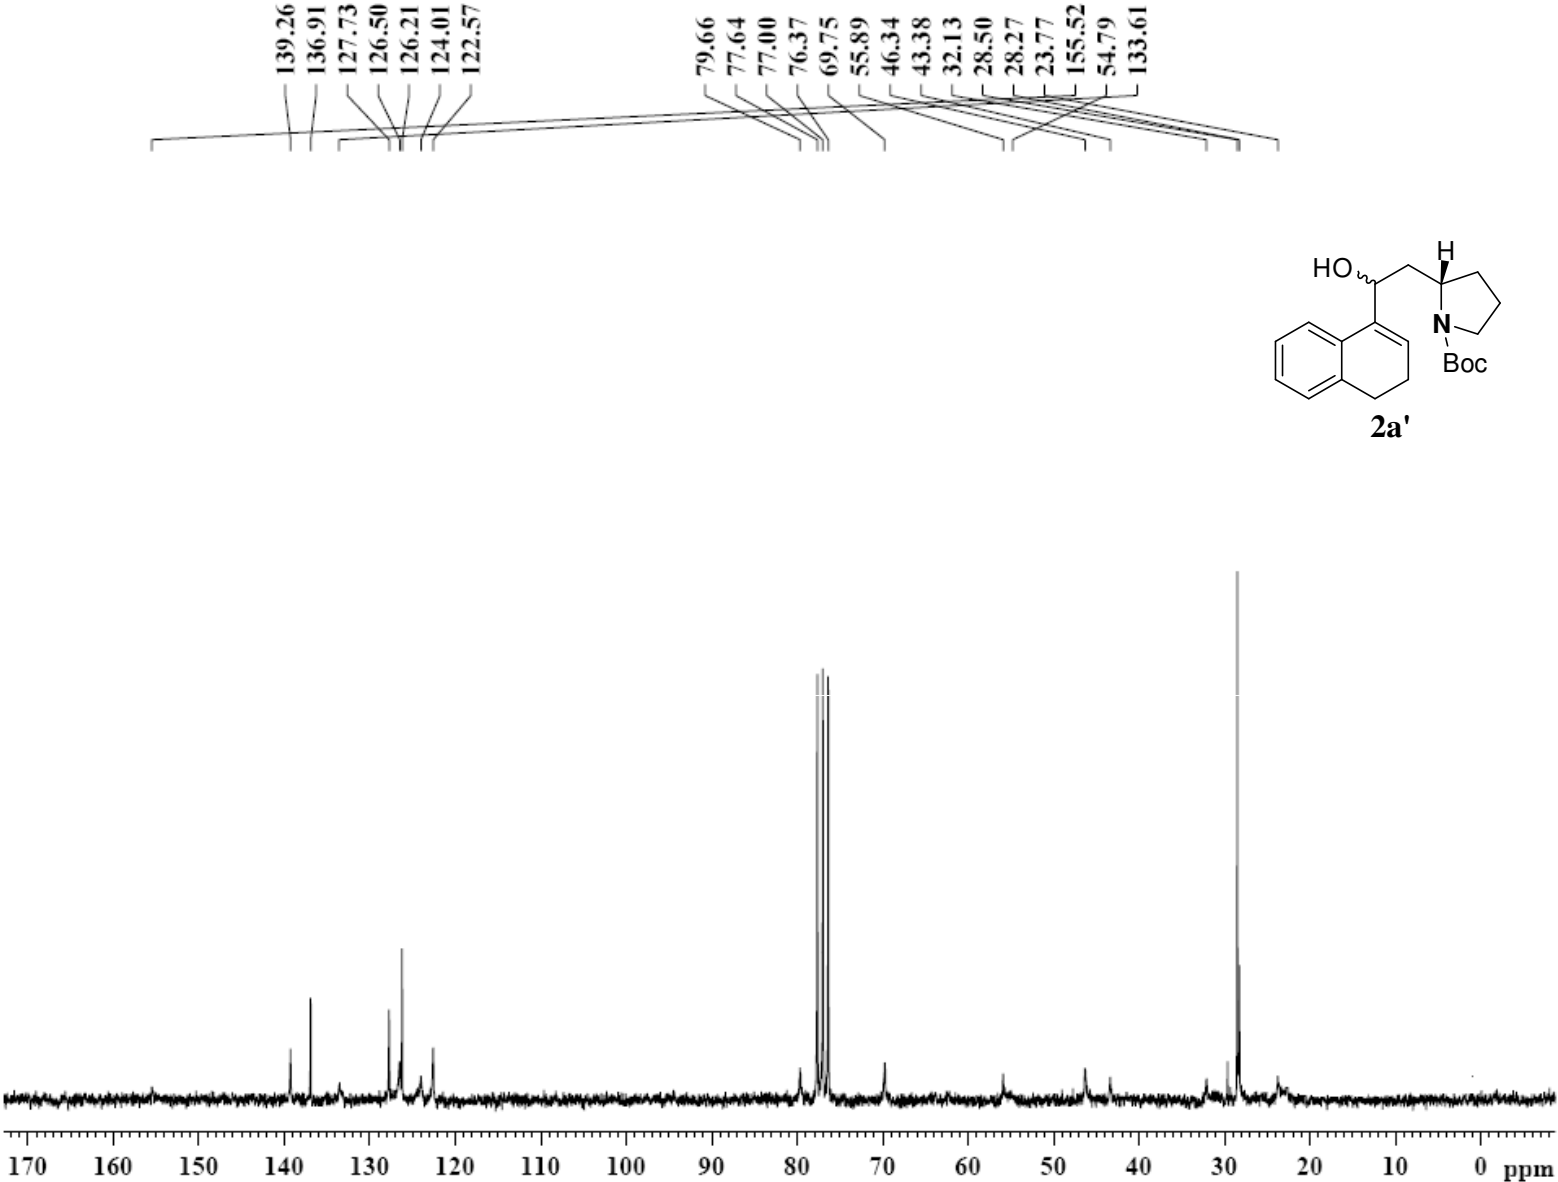

Fig.32 <sup>13</sup>C spectra of compound **2a'**

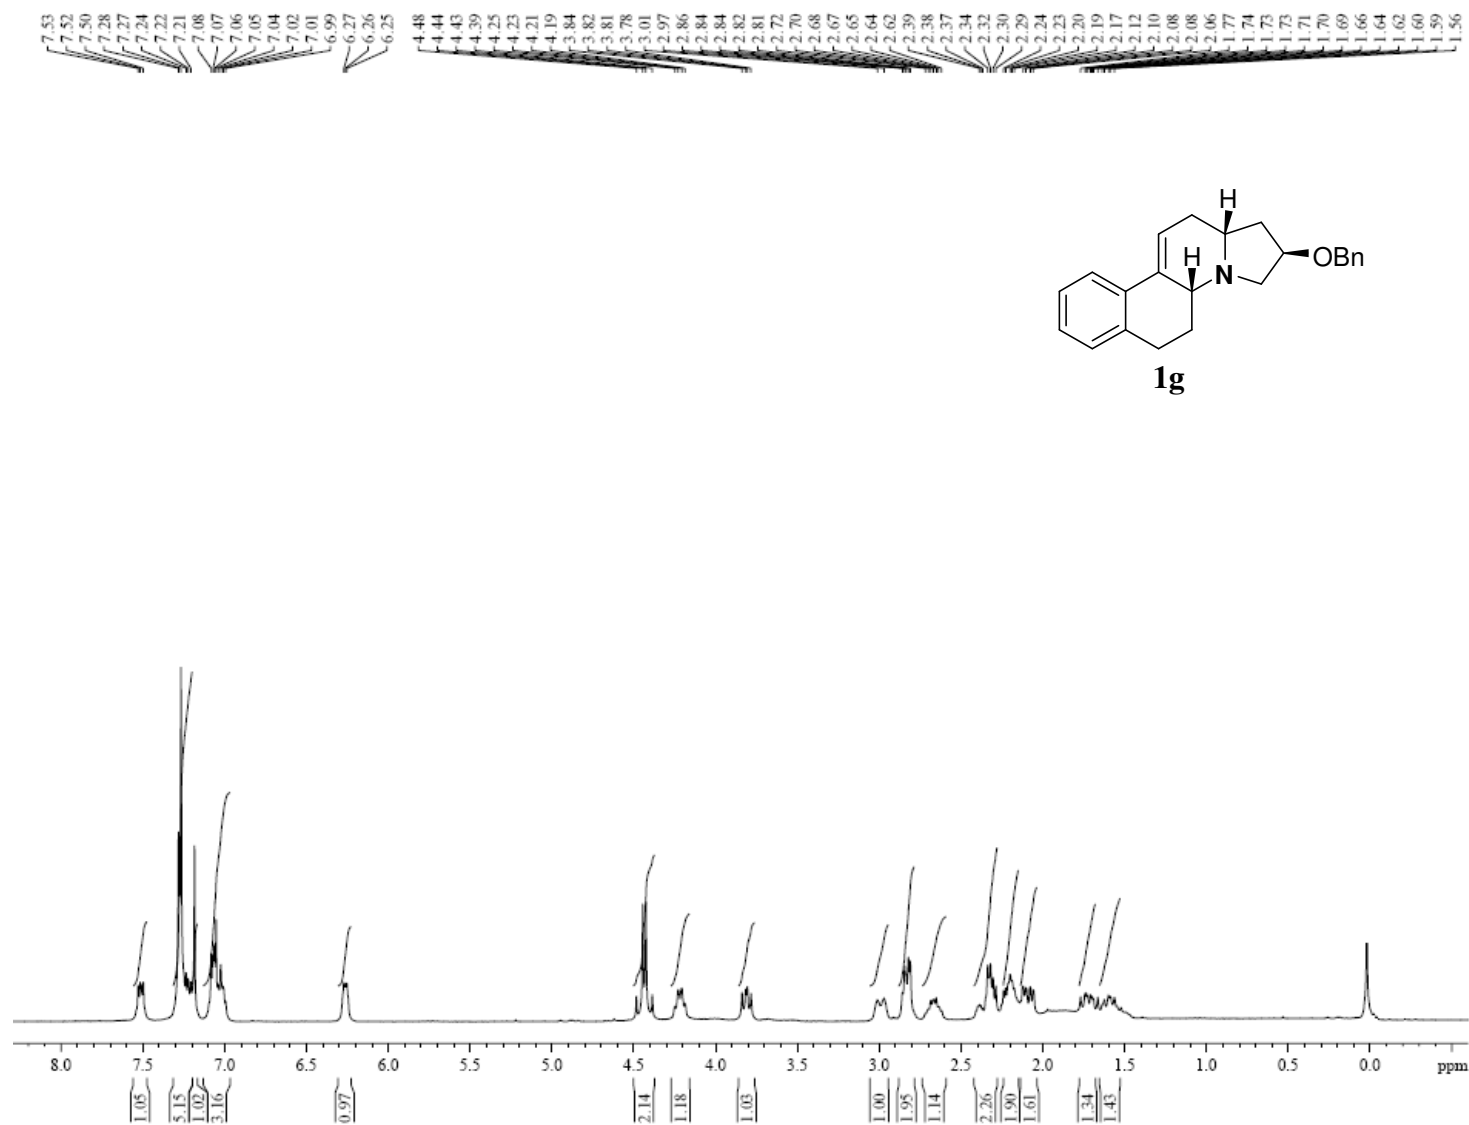

Fig.33 <sup>1</sup>H spectra of compound **1g**

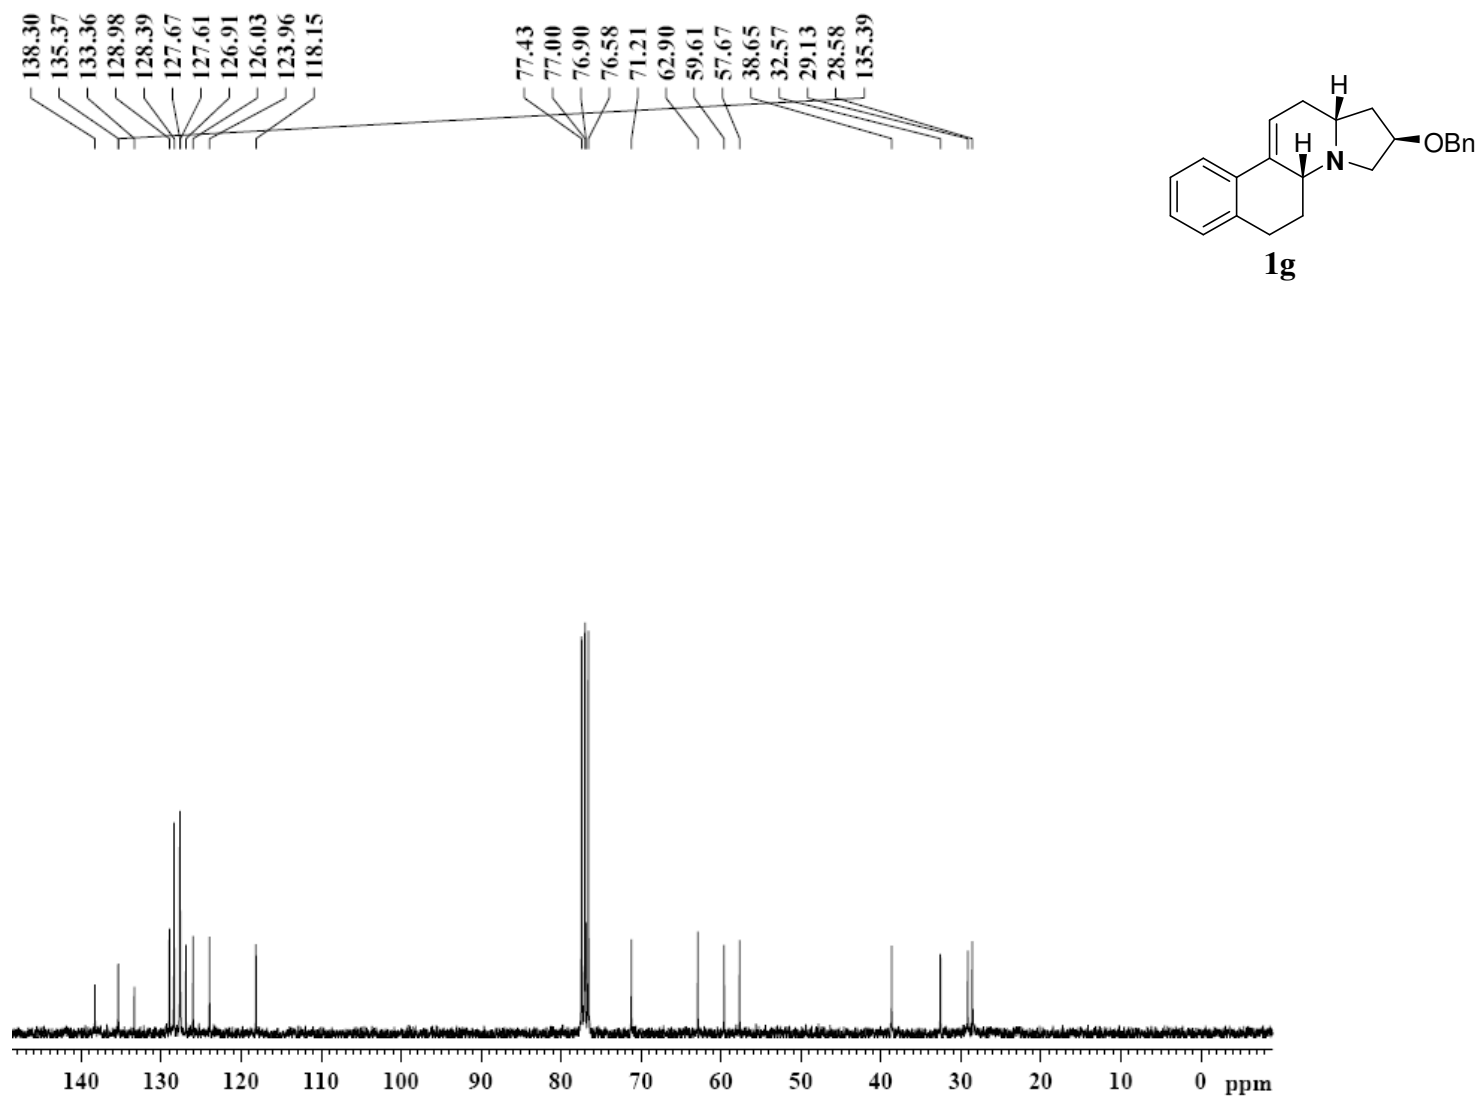

Fig.34 <sup>13</sup>C spectra of compound **1g**

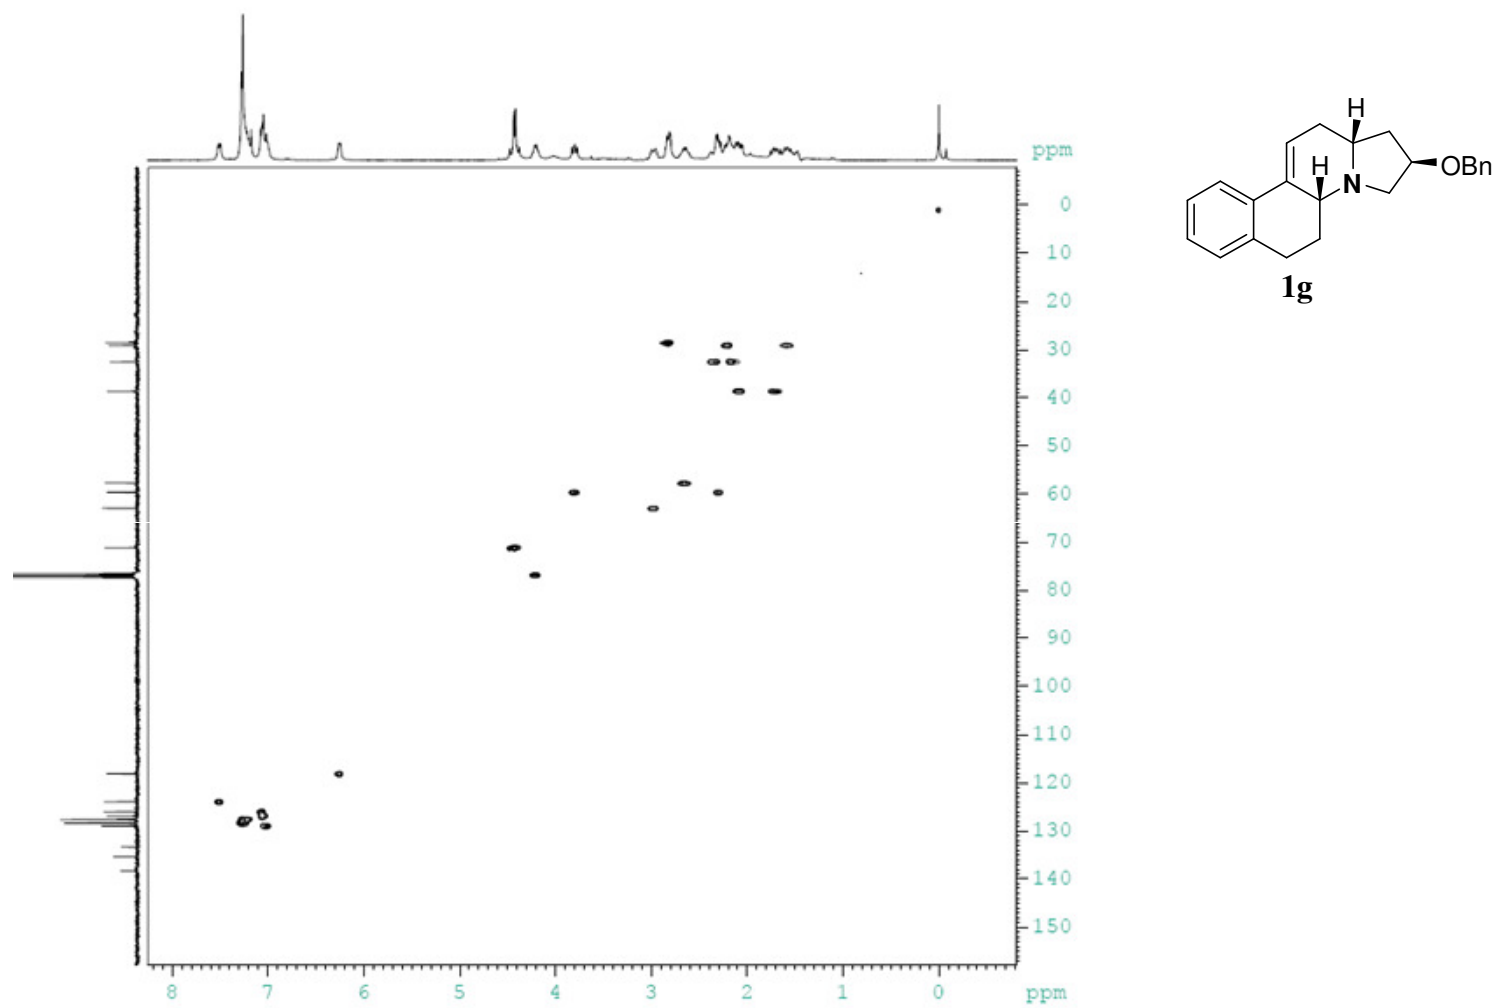

Fig.35 HSQC spectra of compound **1g**

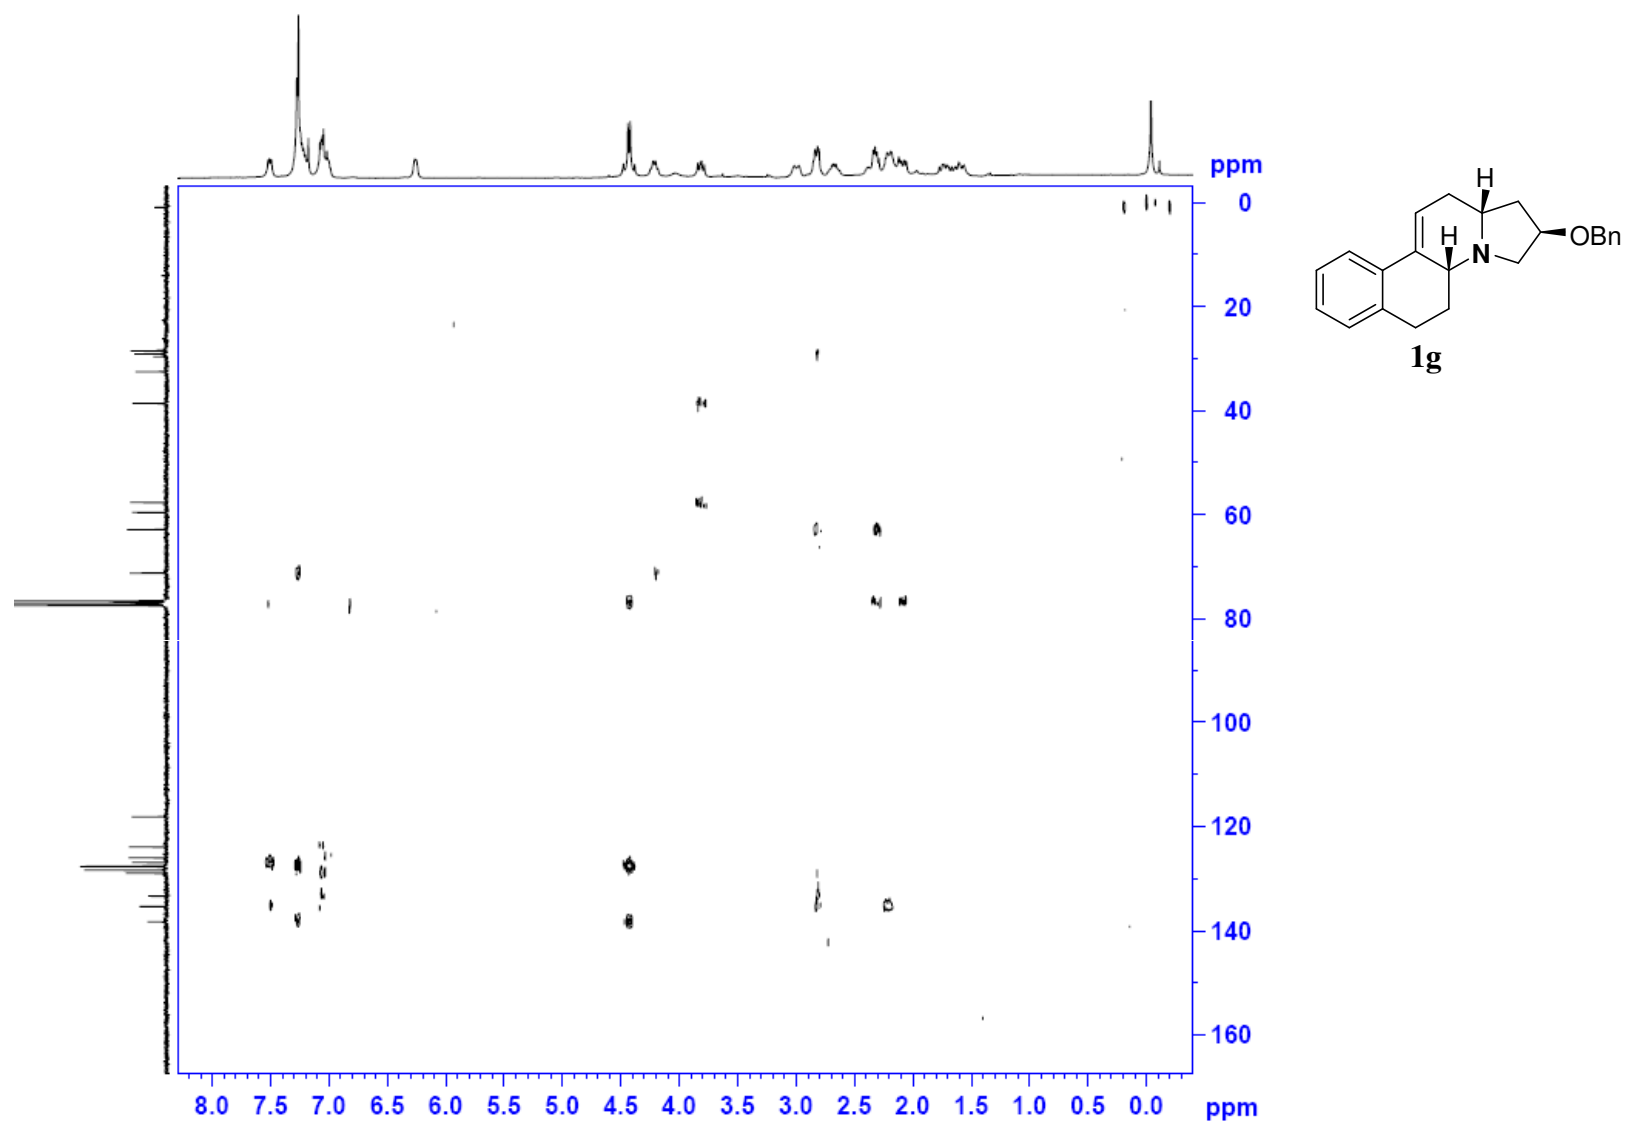

Fig.36 HMBC spectra of compound **1g**

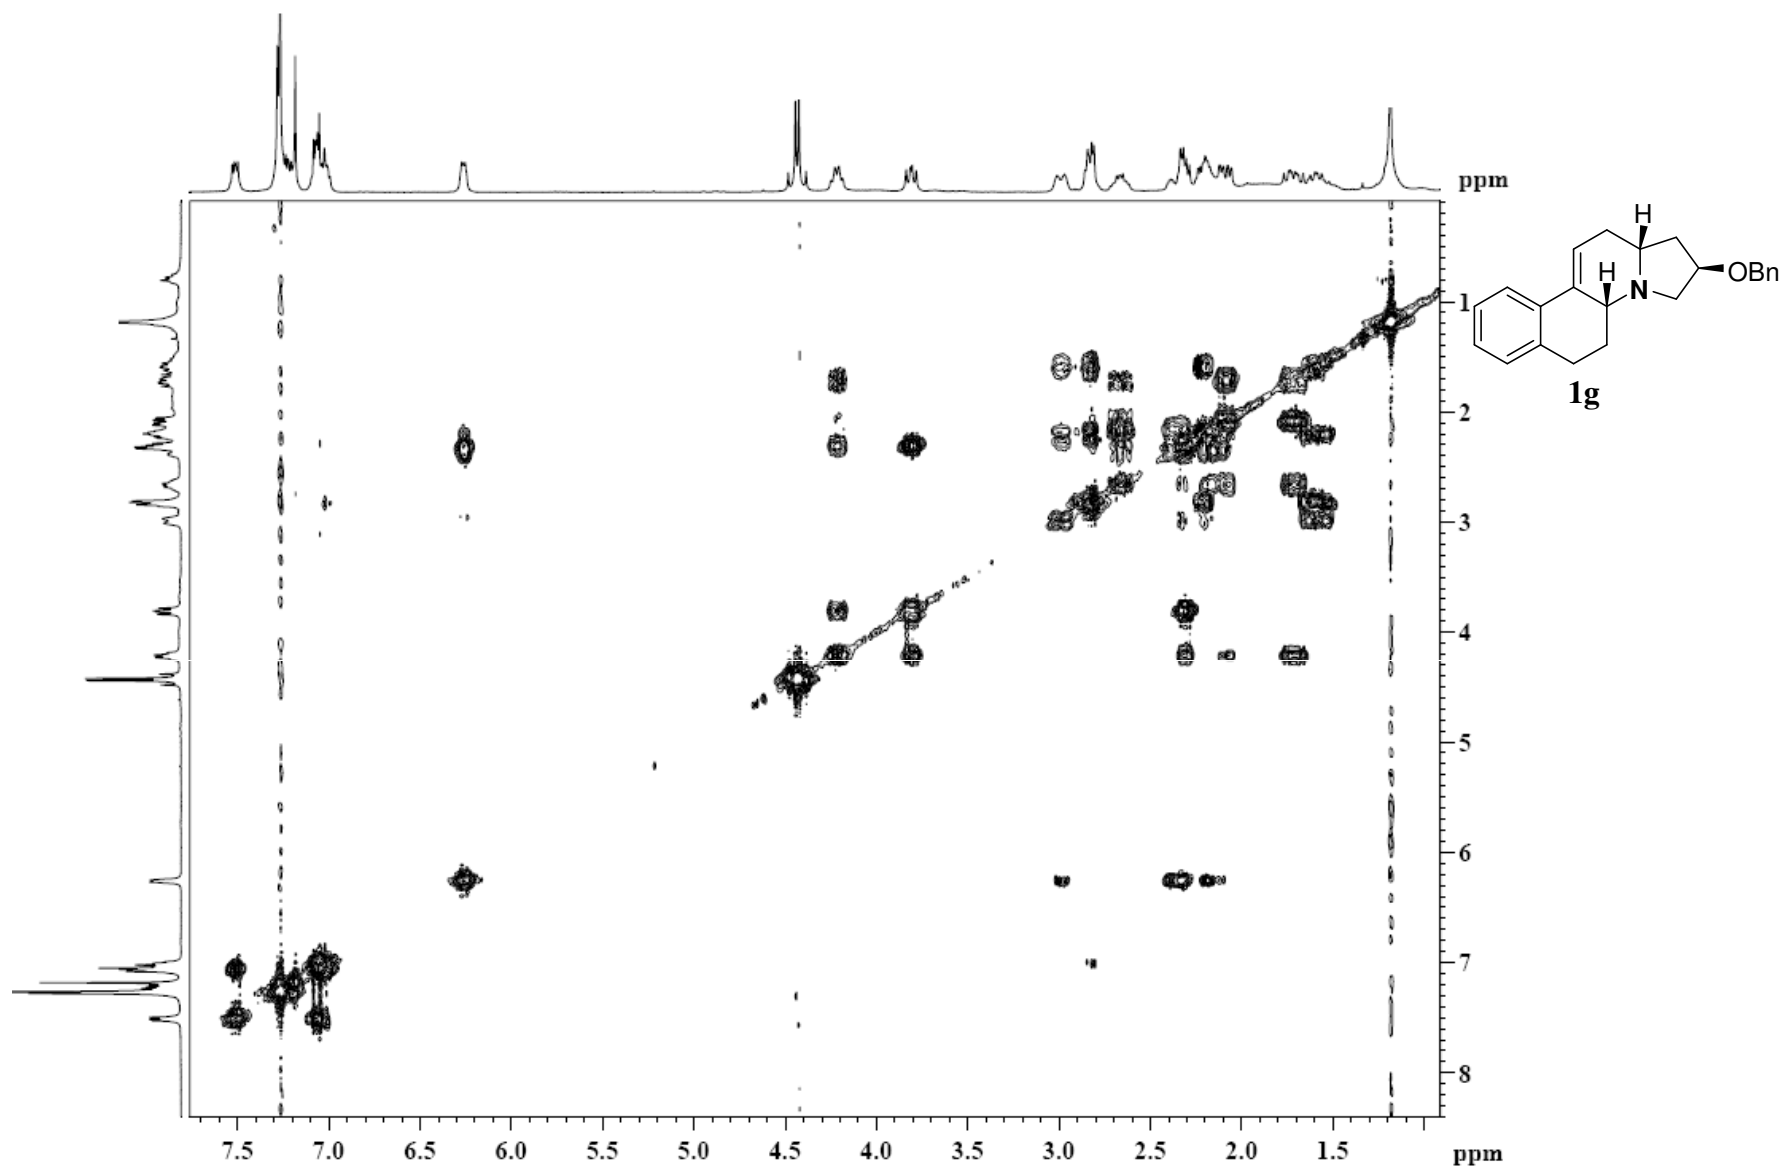

Fig.37 COSY spectra of compound **1g**

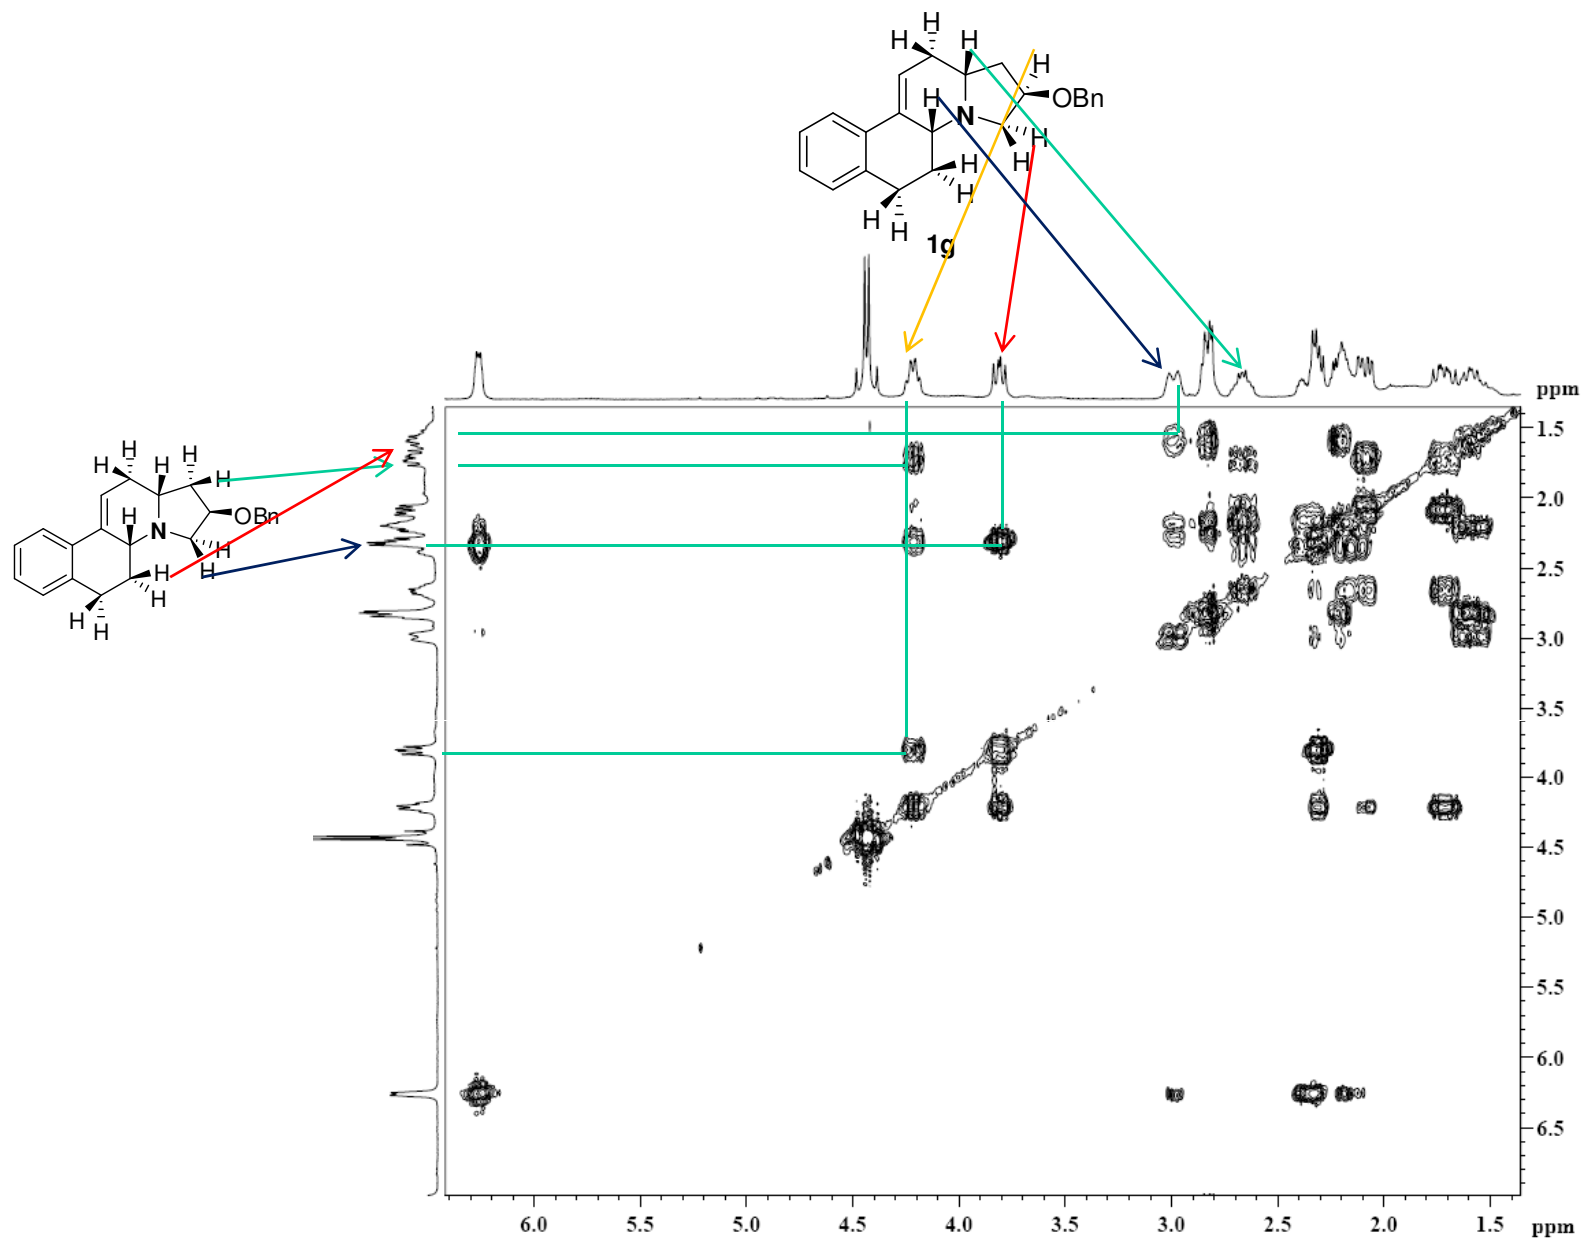

Fig.38 COSY ( 1.5-7.00 ppm) expanded spectra of compound **1g**

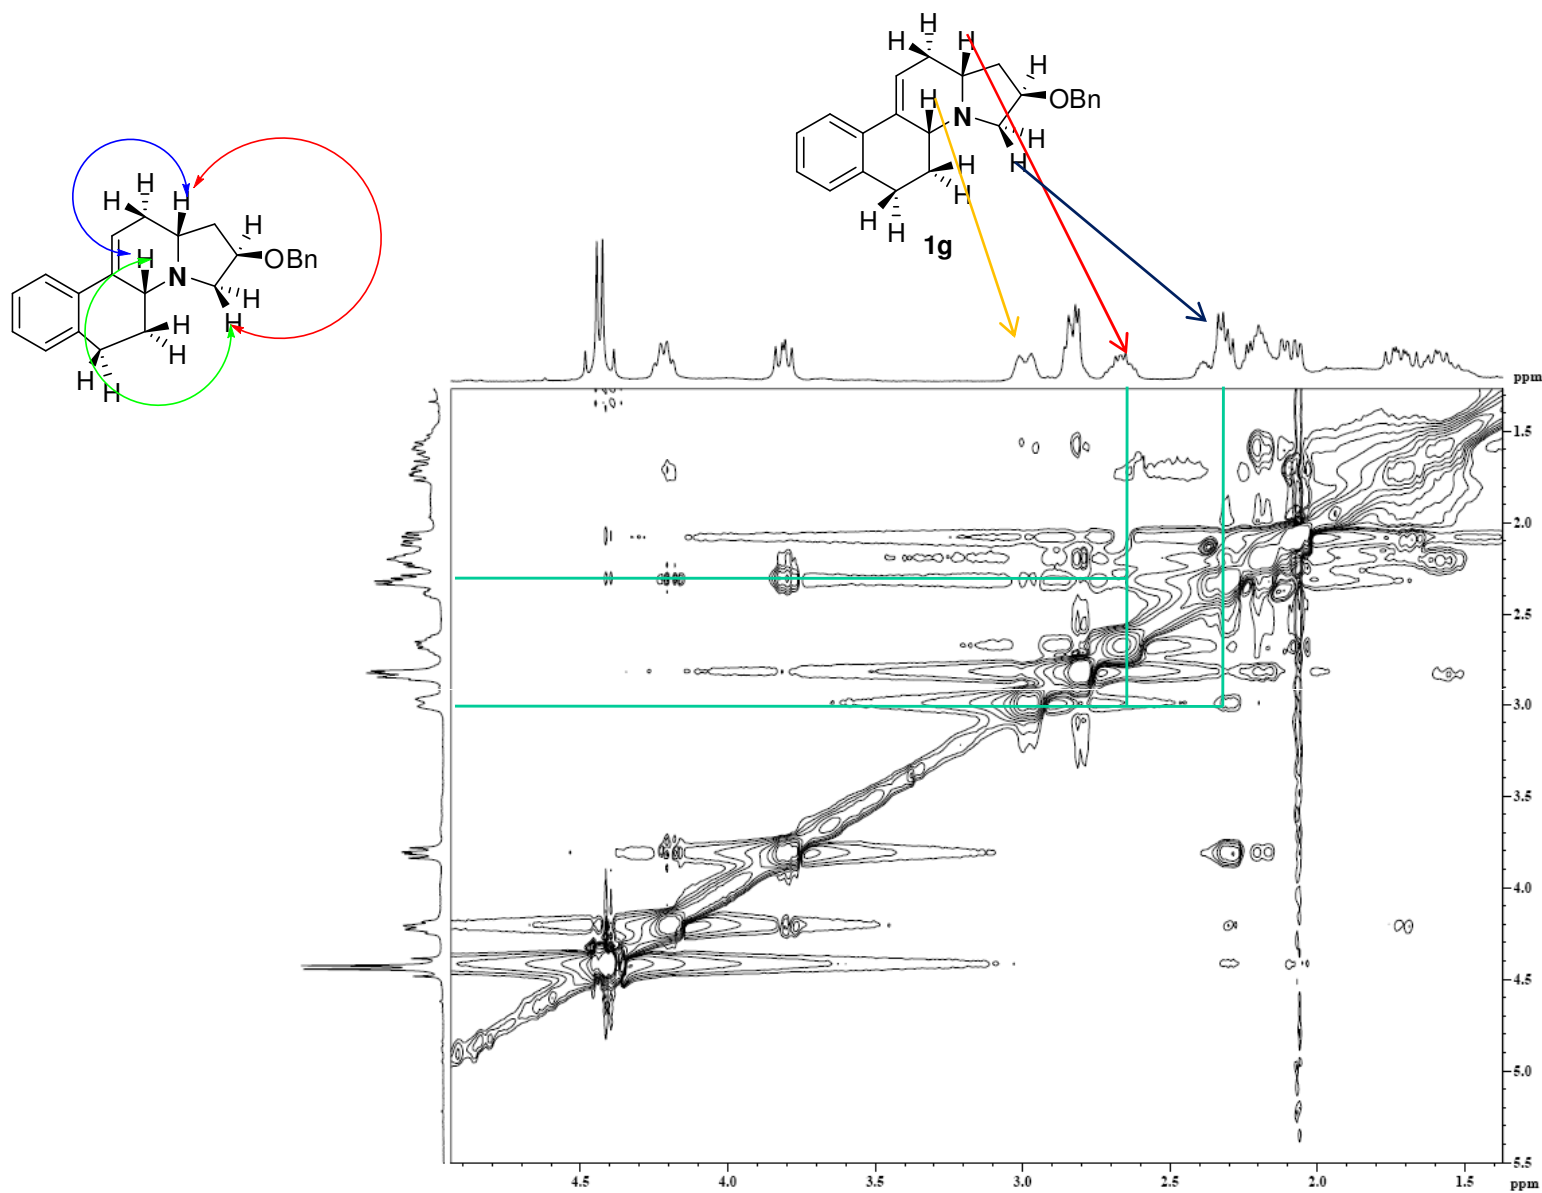

Fig.39 NOESY ( expanded 1.4-4.9 ppm) spectra of compound **1g**

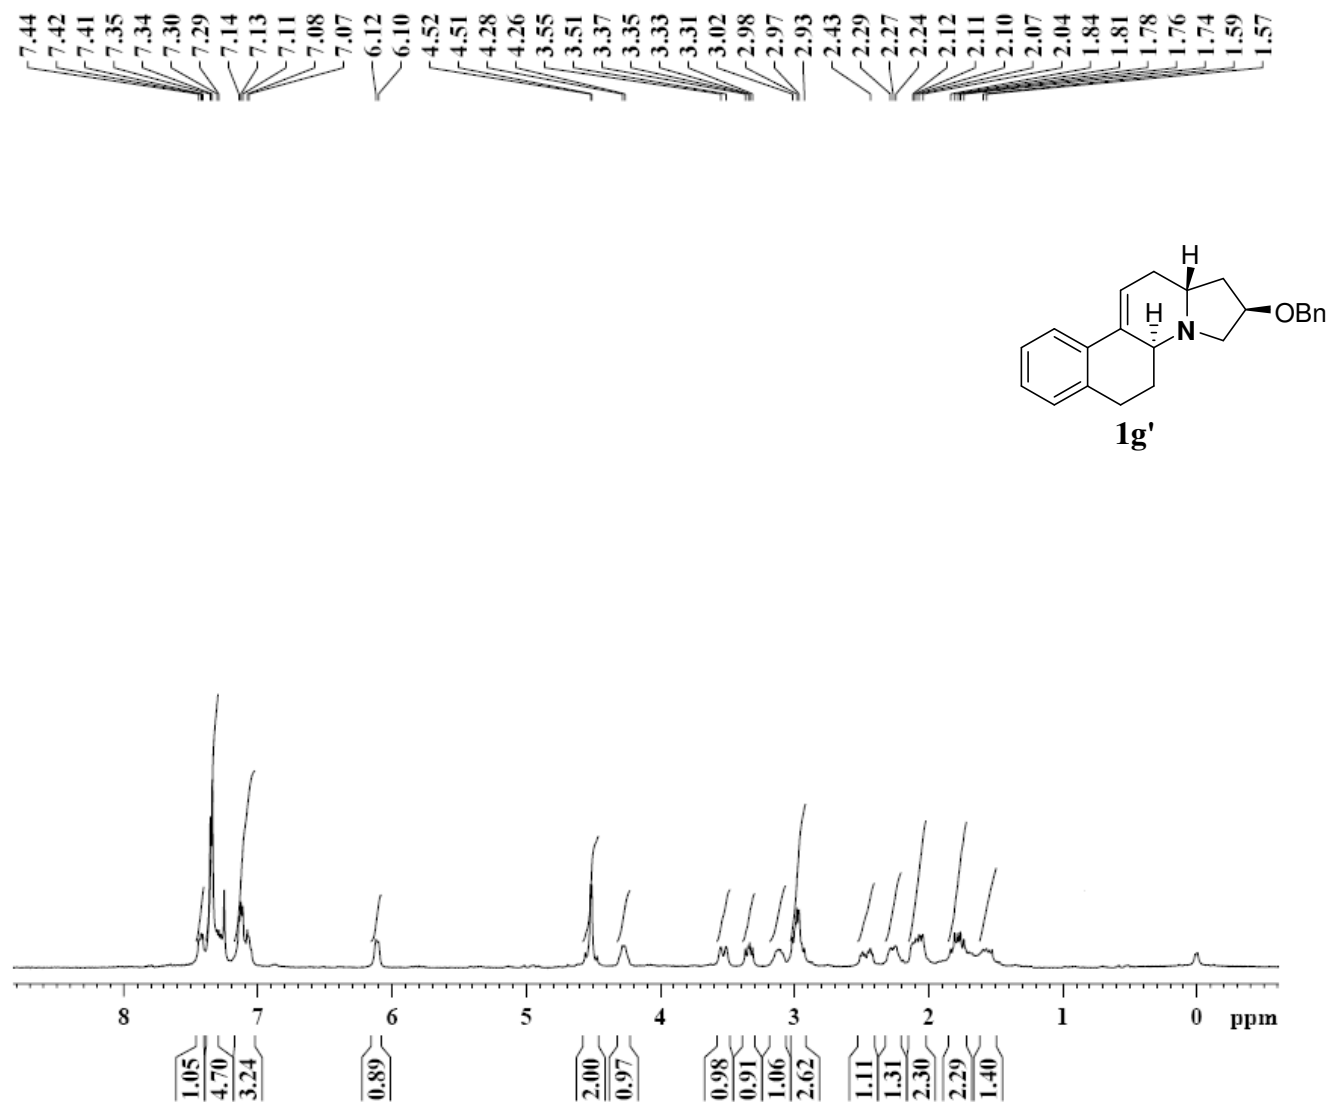

Fig.40 <sup>1</sup>H spectra of compound **1g'**

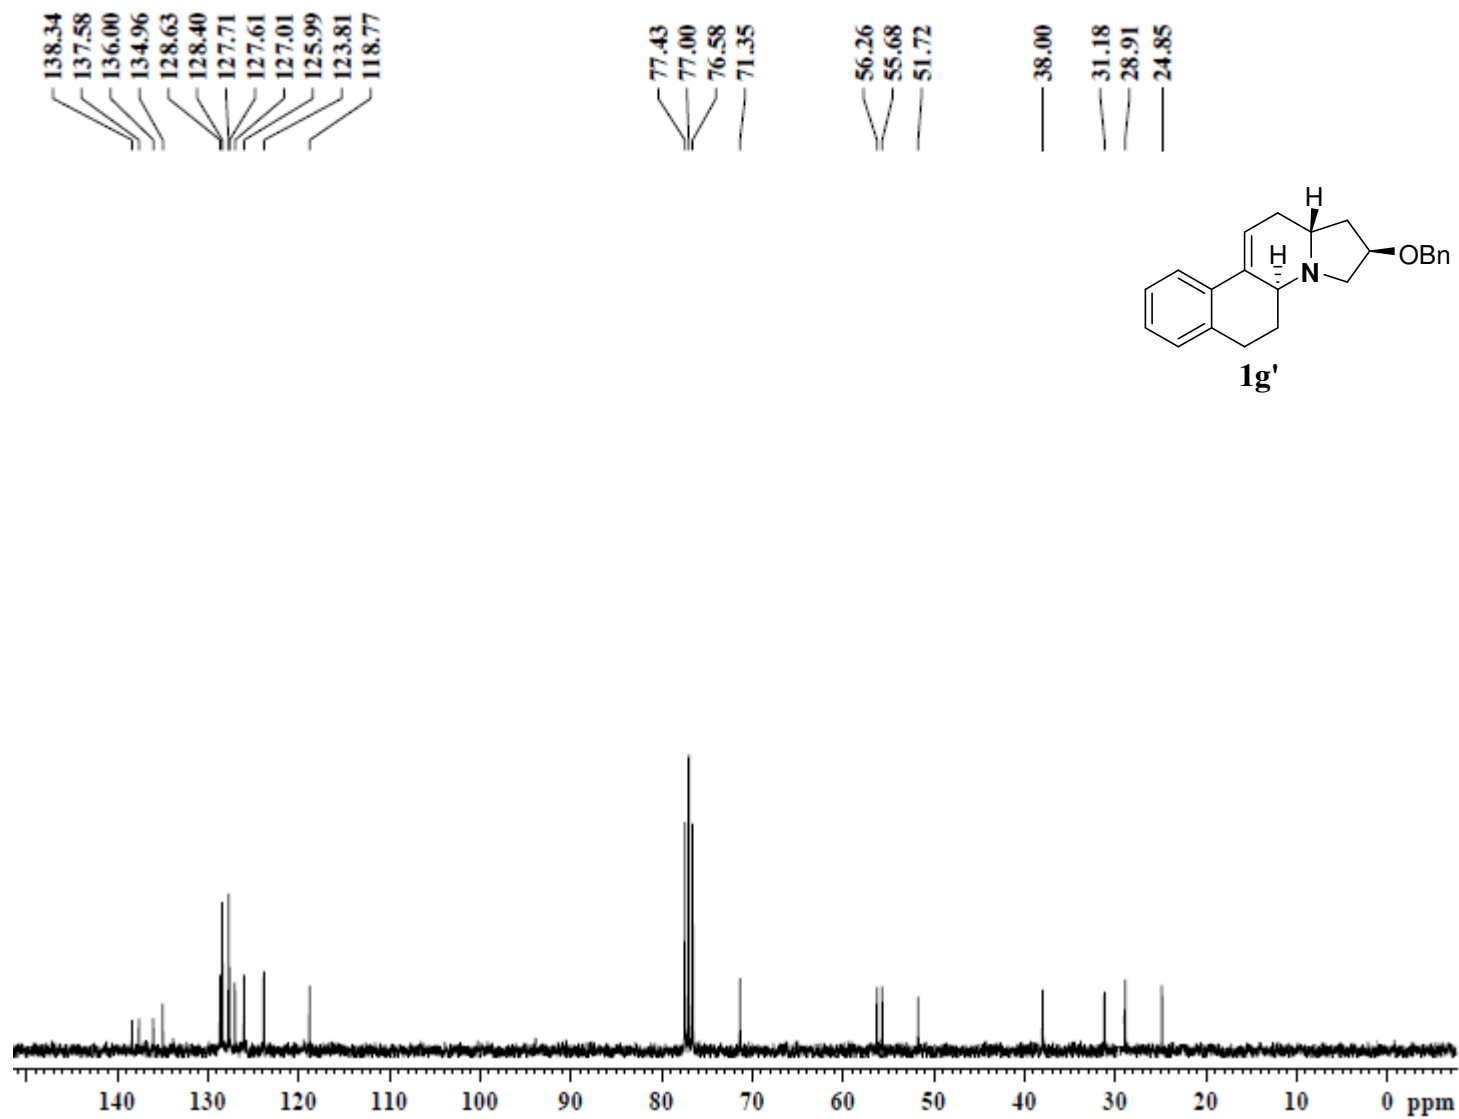

Fig.41 <sup>13</sup>C spectra of compound **1g'**

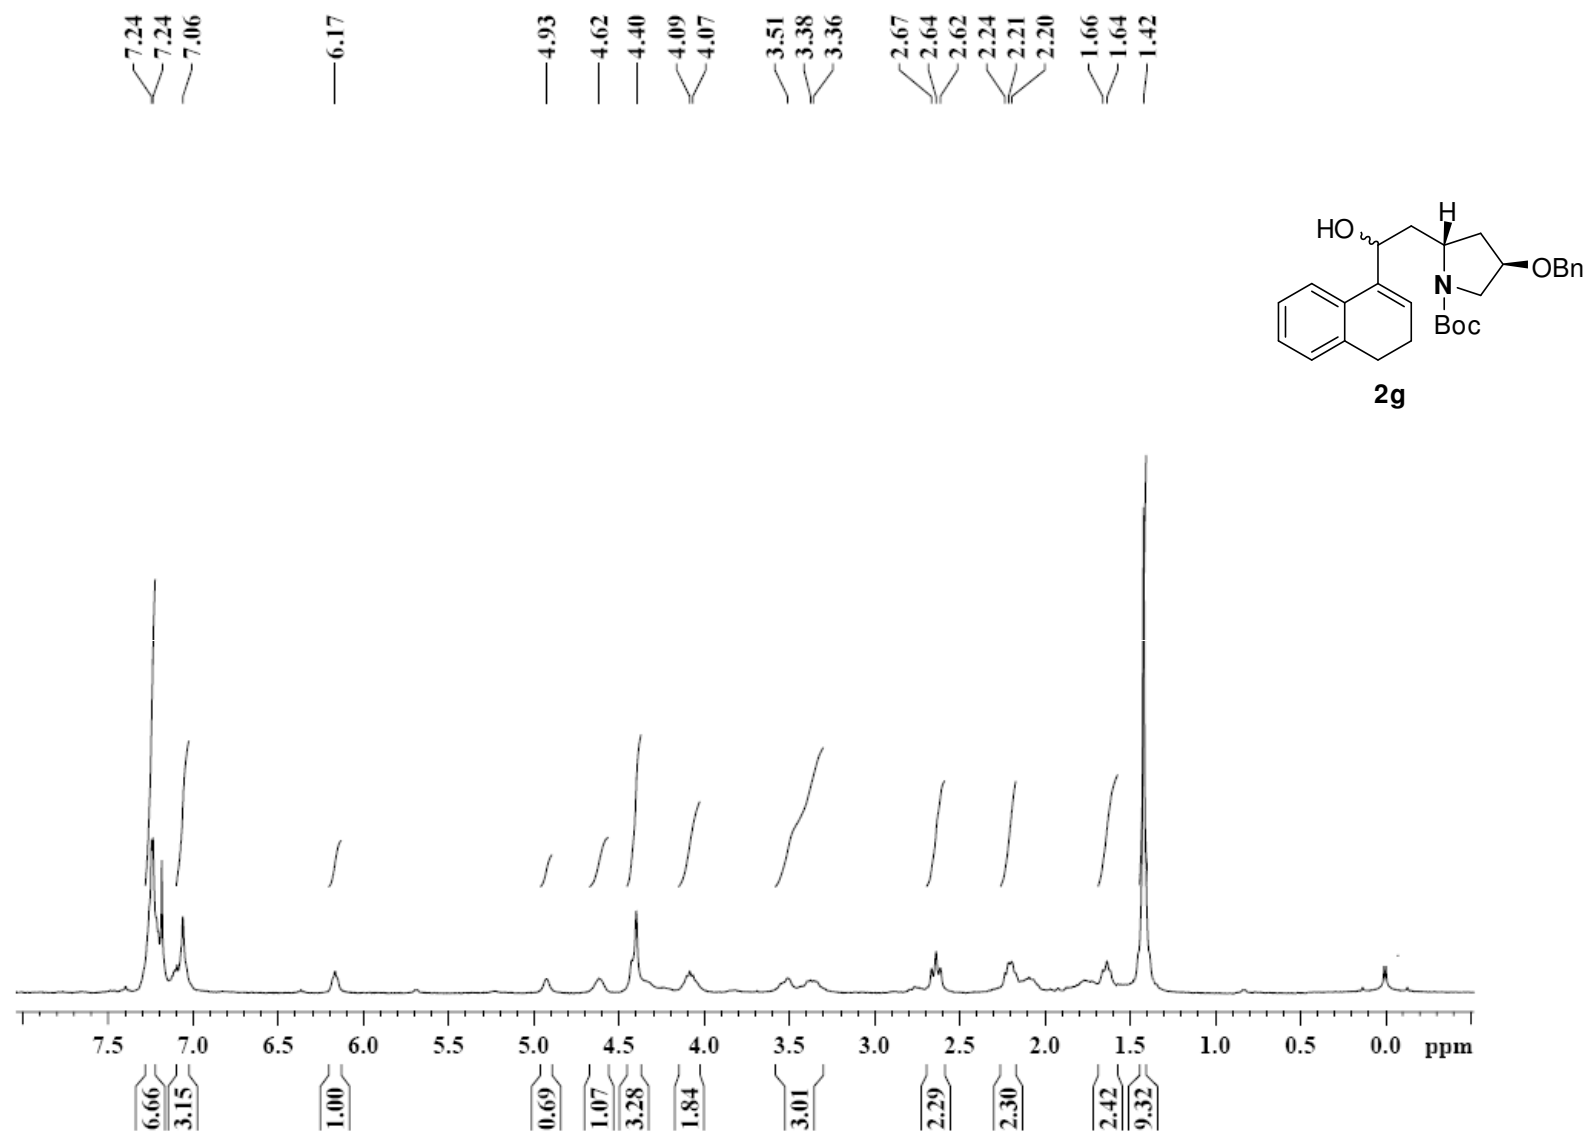

Fig.42 <sup>1</sup>H spectra of compound **2g**

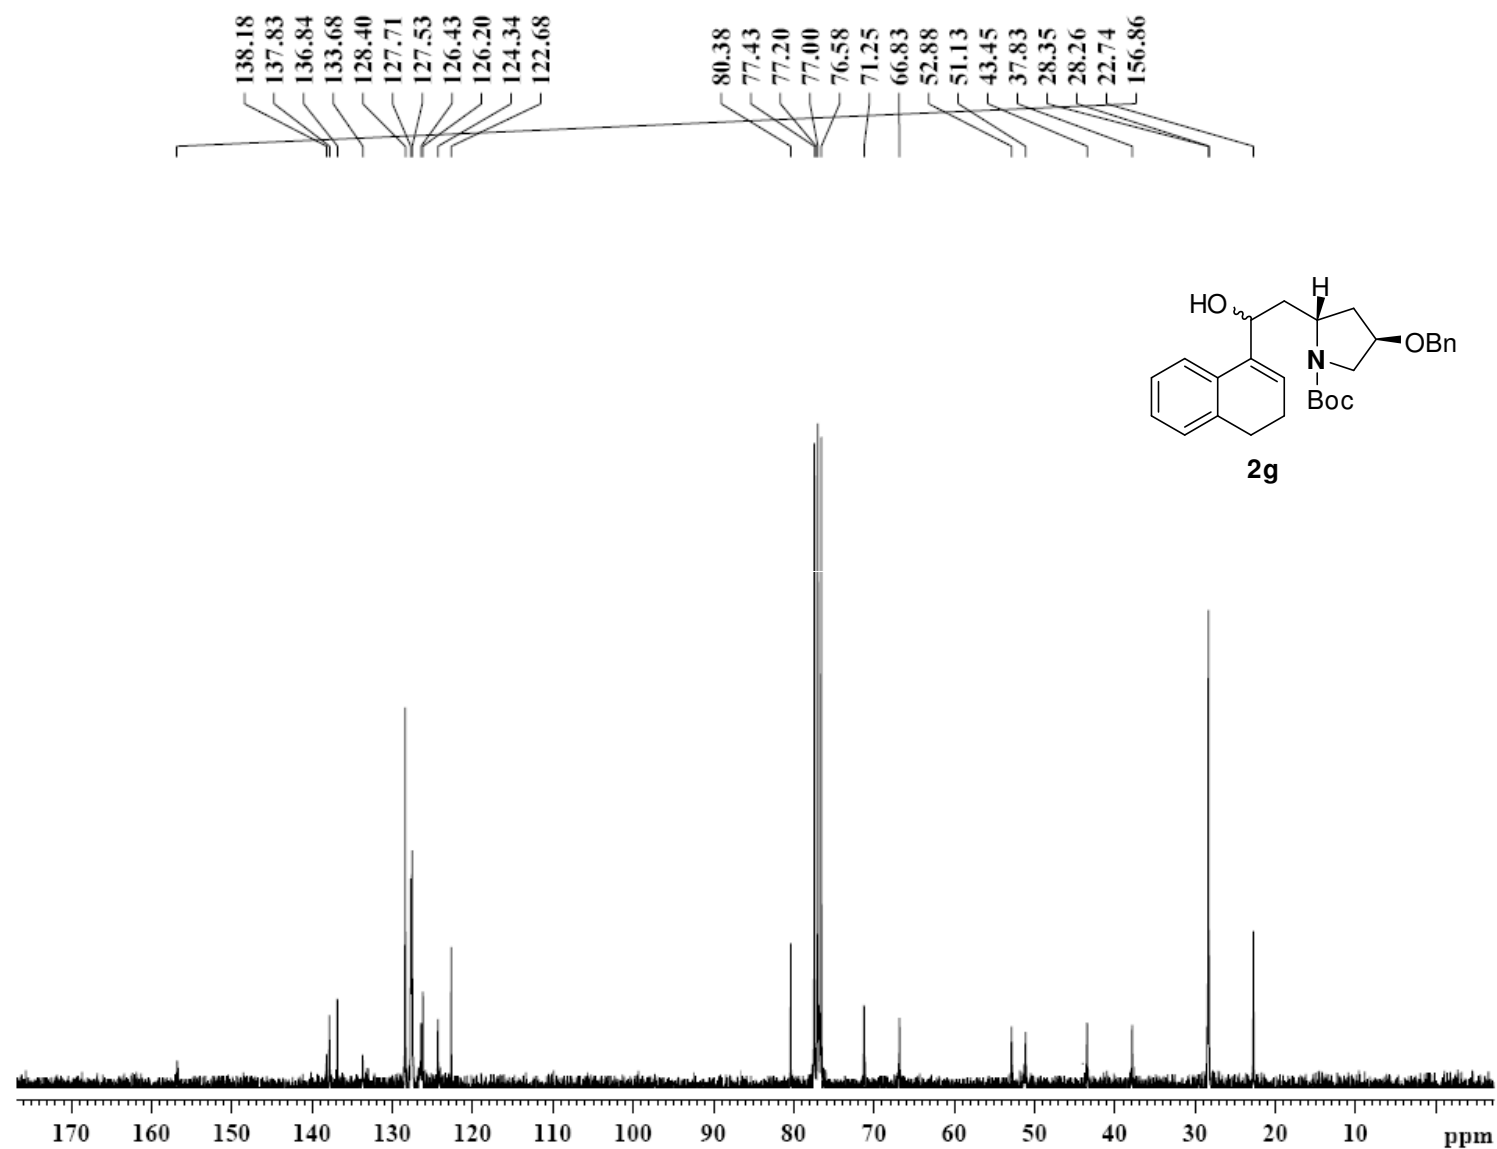

Fig.43  $^{13}\text{C}$  spectra of compound **2g**

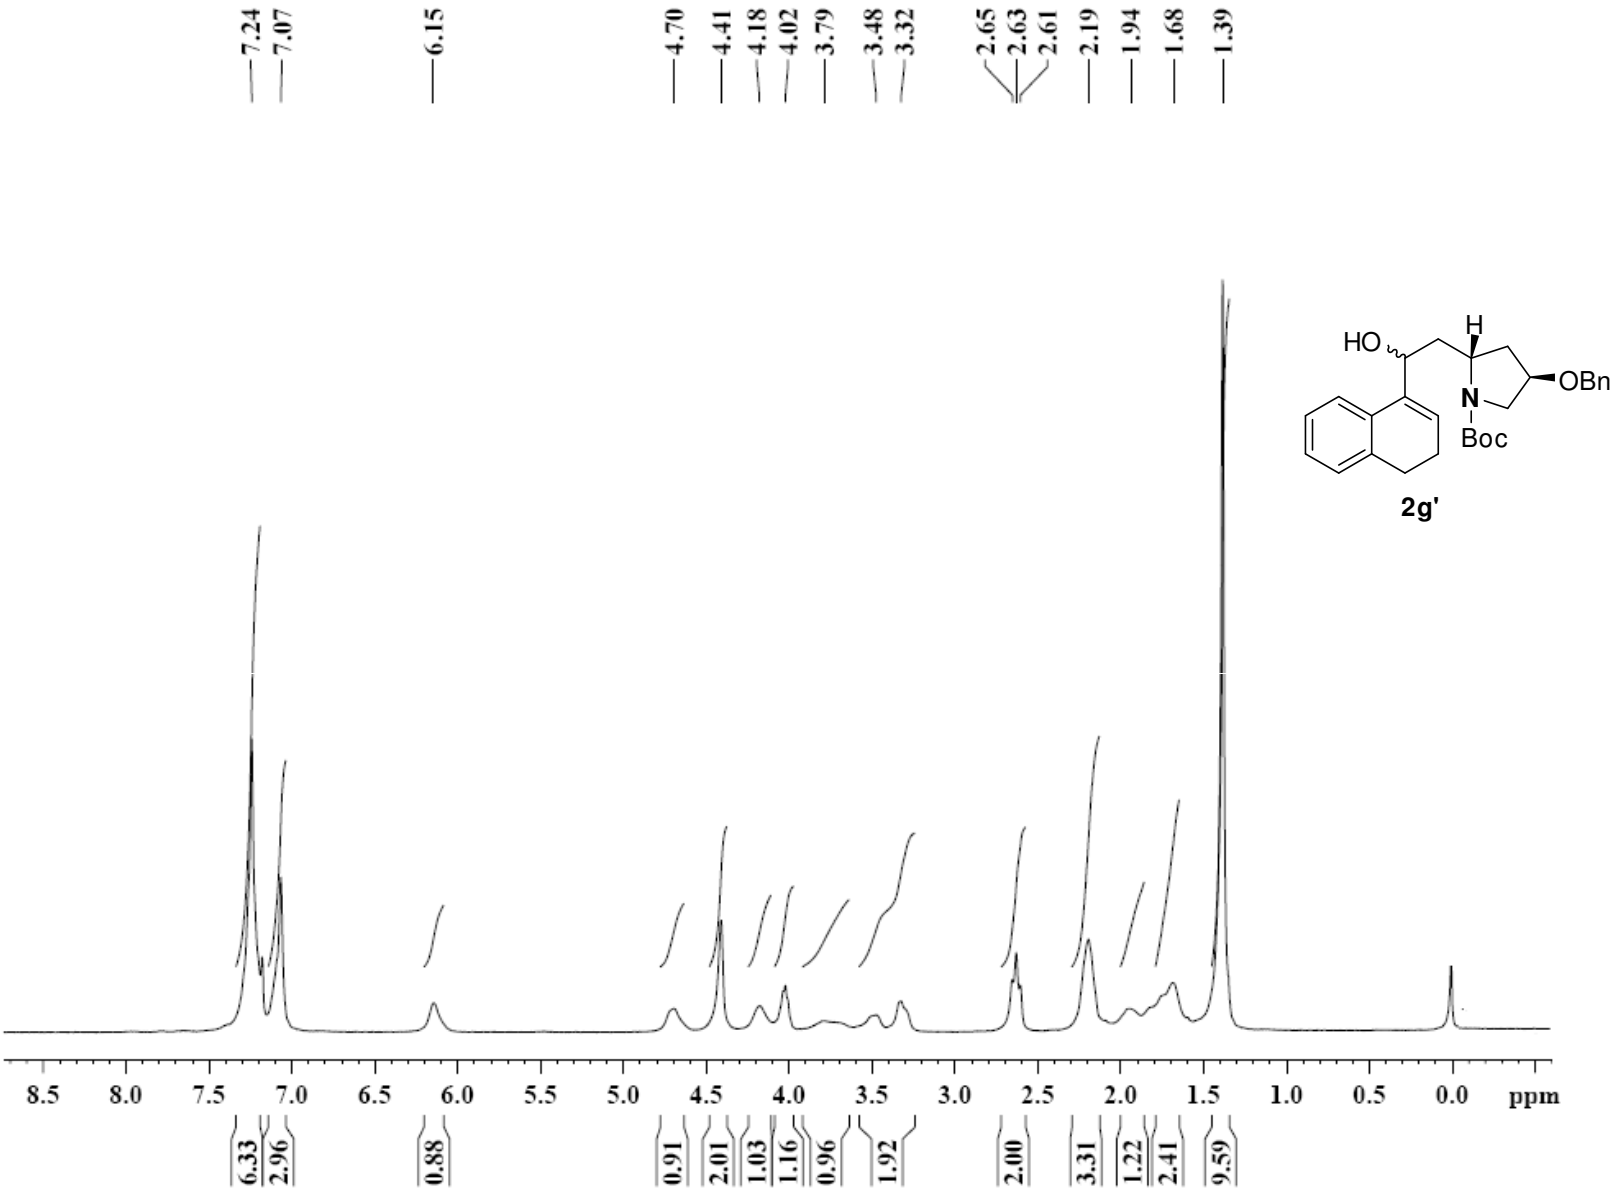

Fig.44 <sup>1</sup>H spectra of compound 2g'

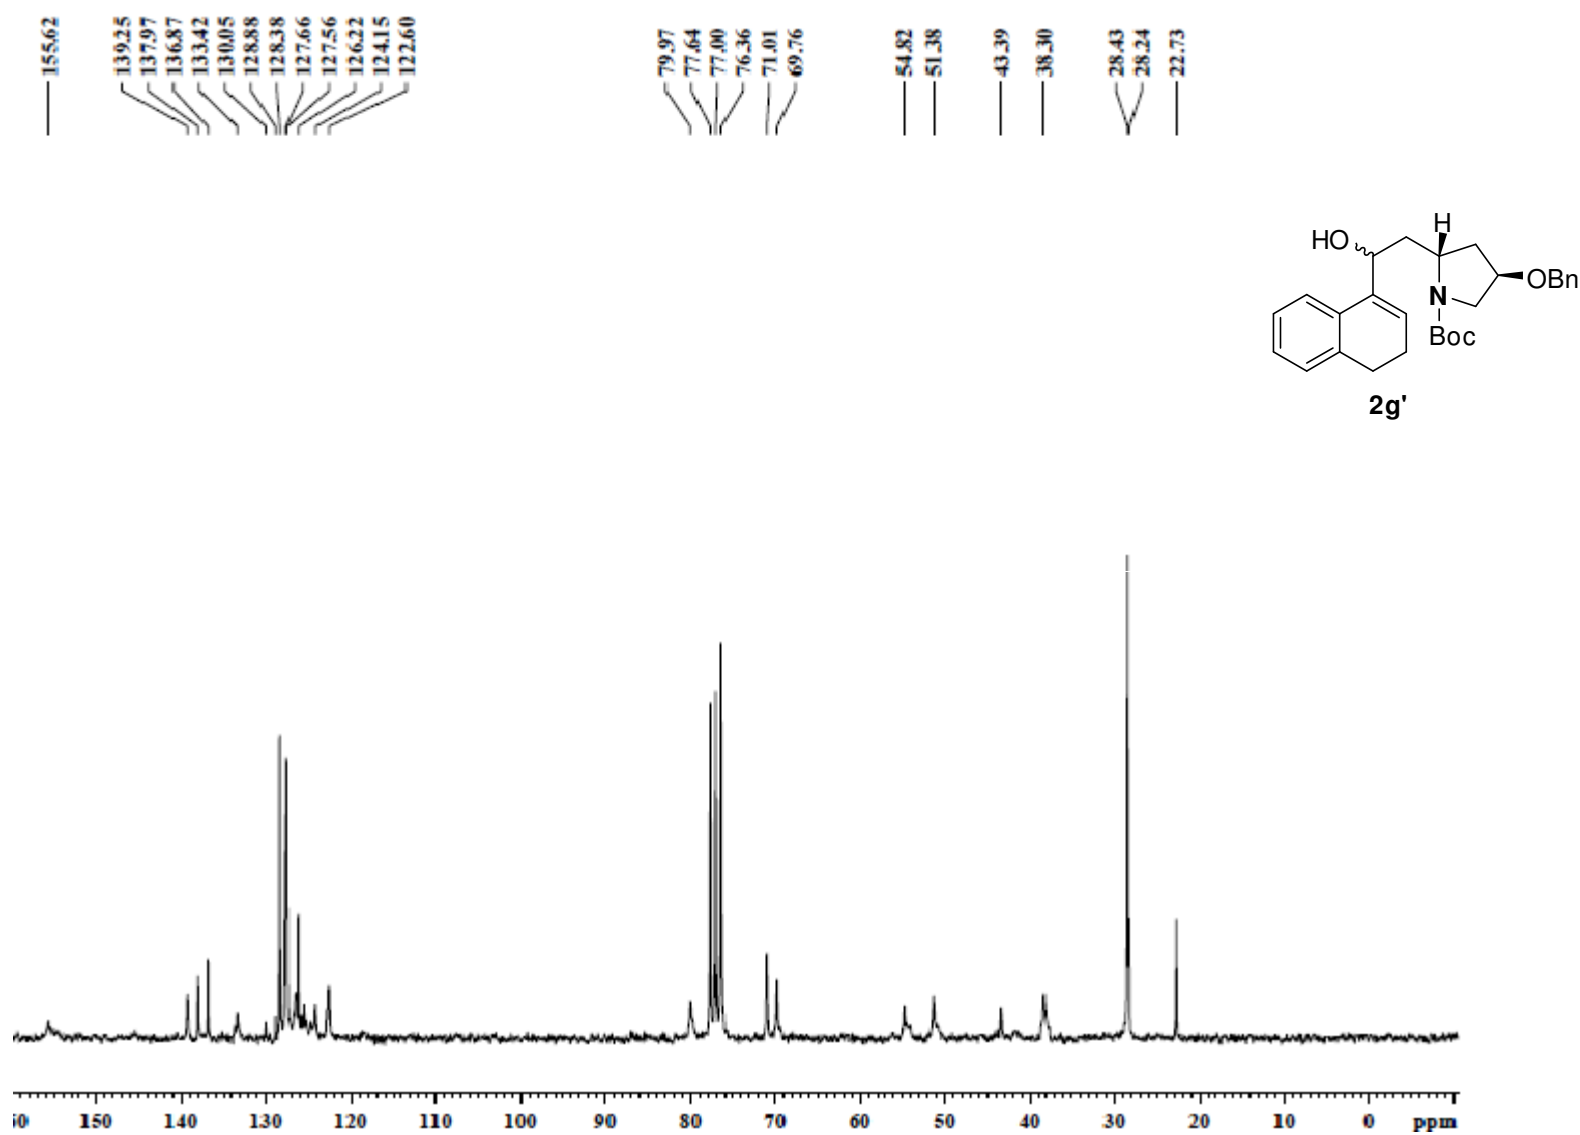

Fig.45 <sup>13</sup>C spectra of compound **2g'**

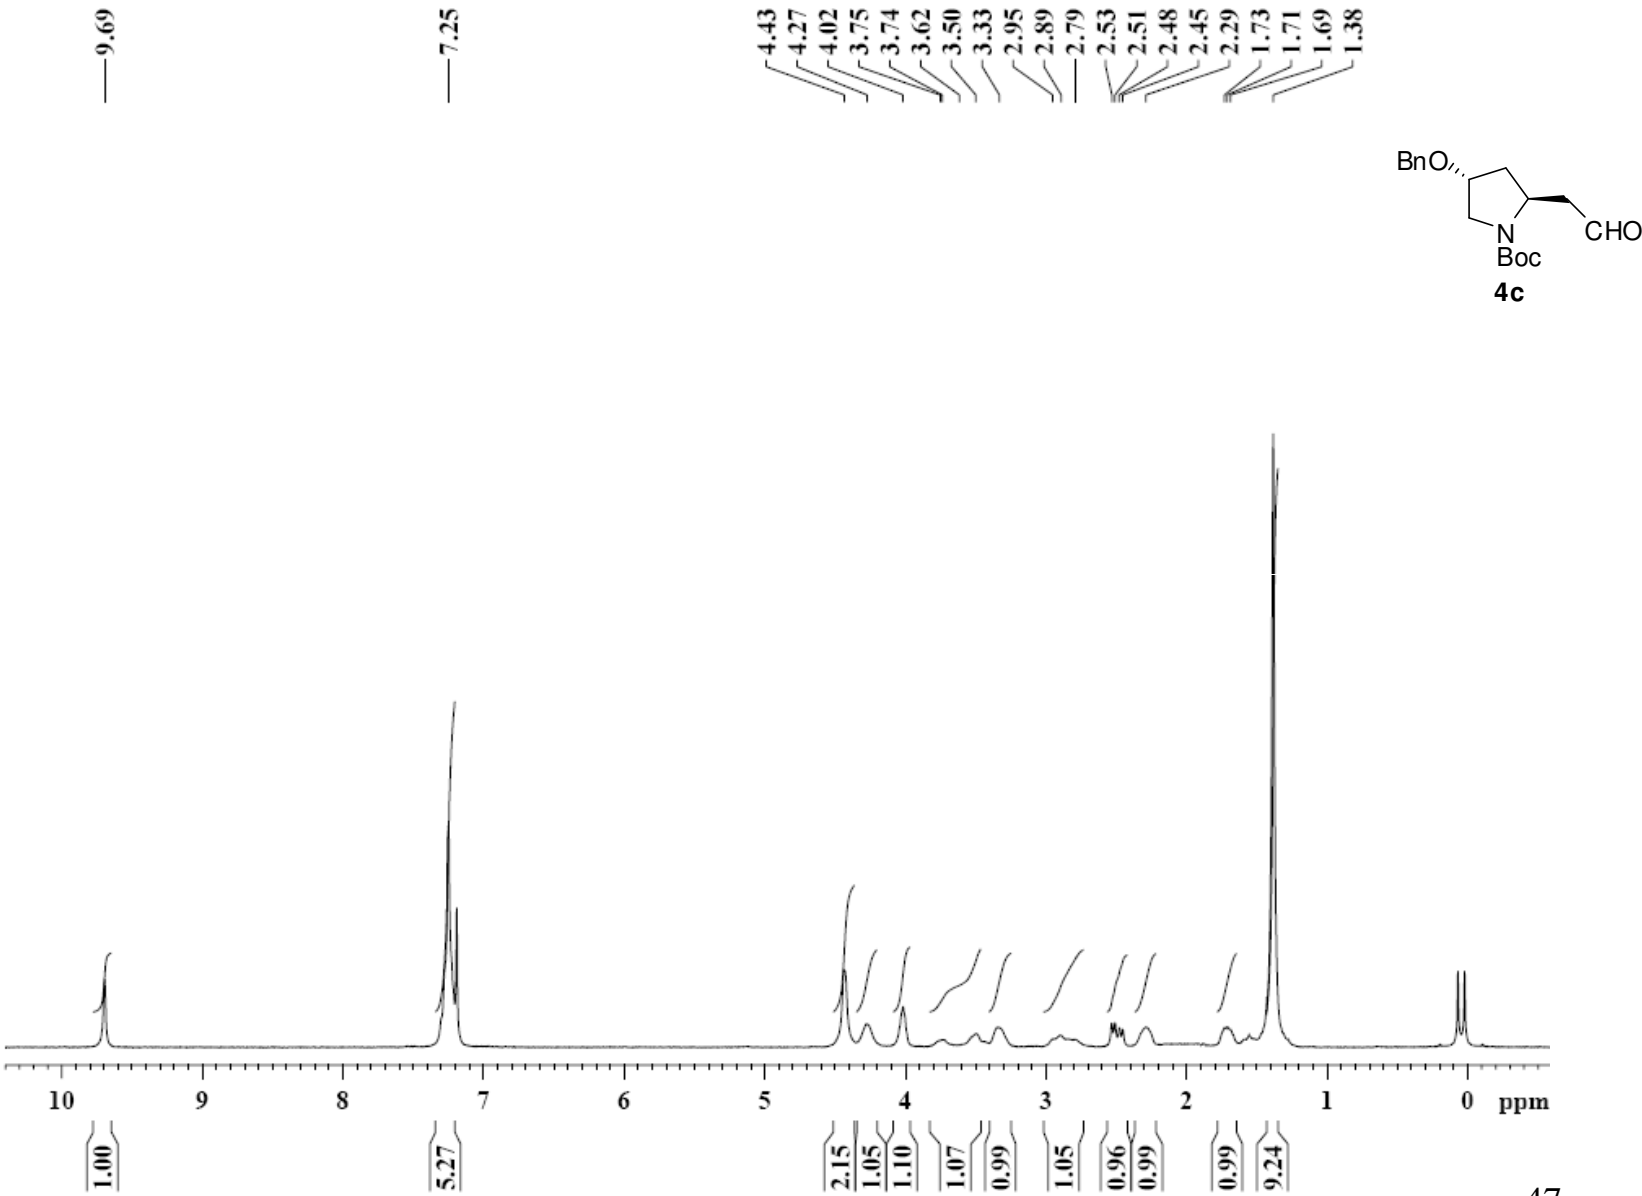

Fig.46 <sup>1</sup>H spectra of compound **4c**

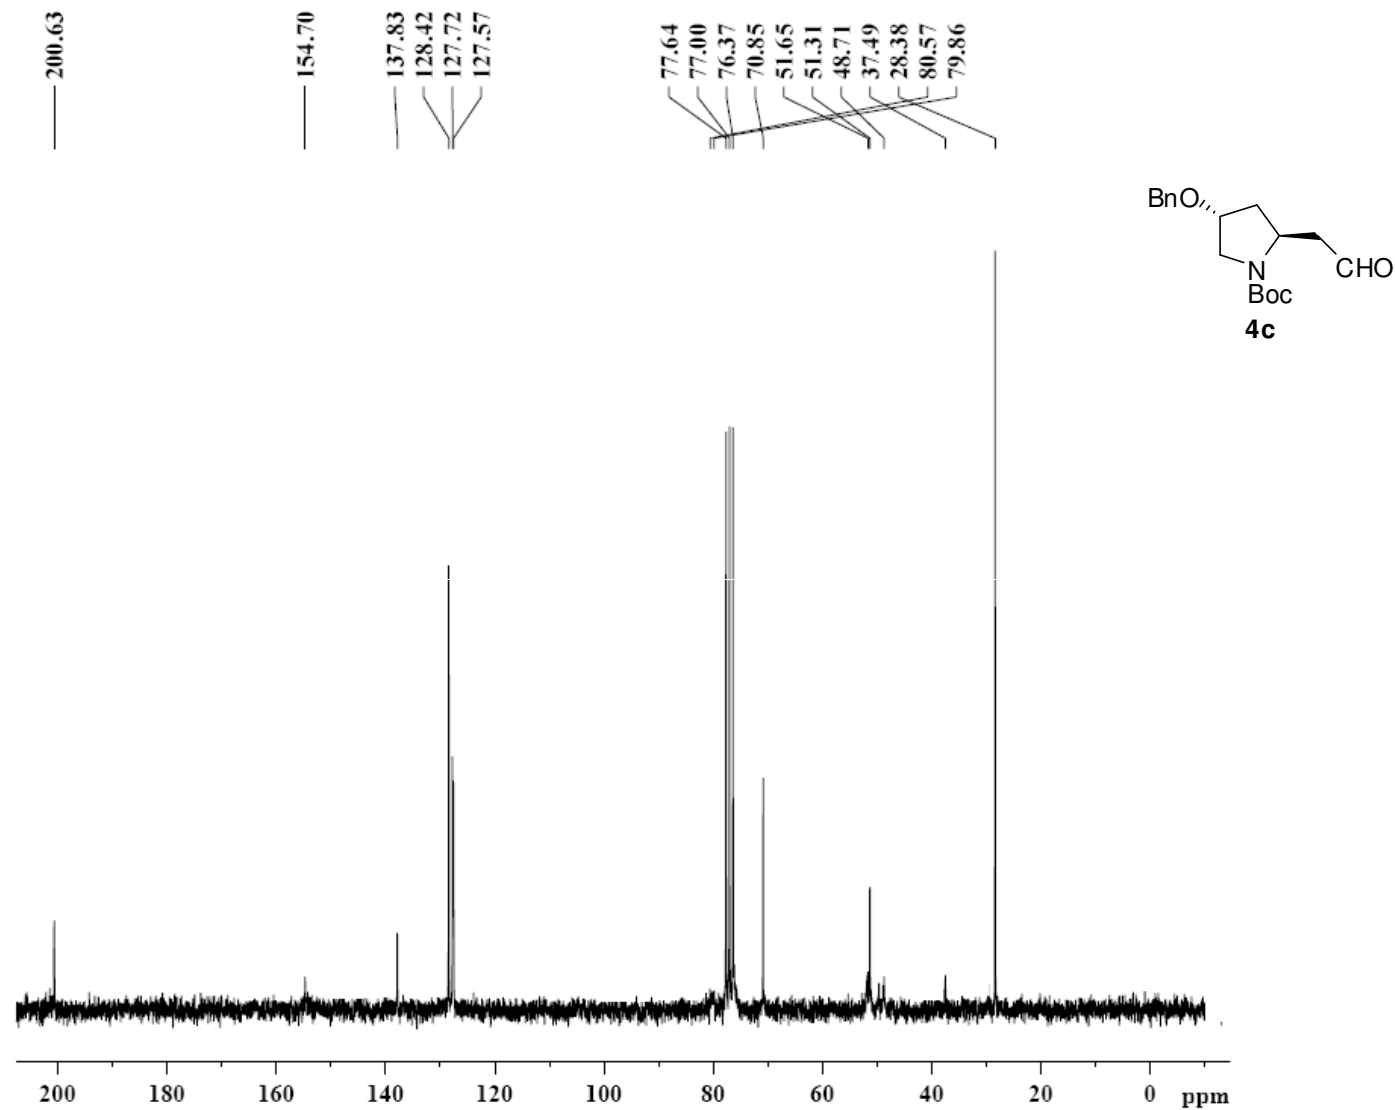

Fig.47 <sup>13</sup>C spectra of compound **4c**

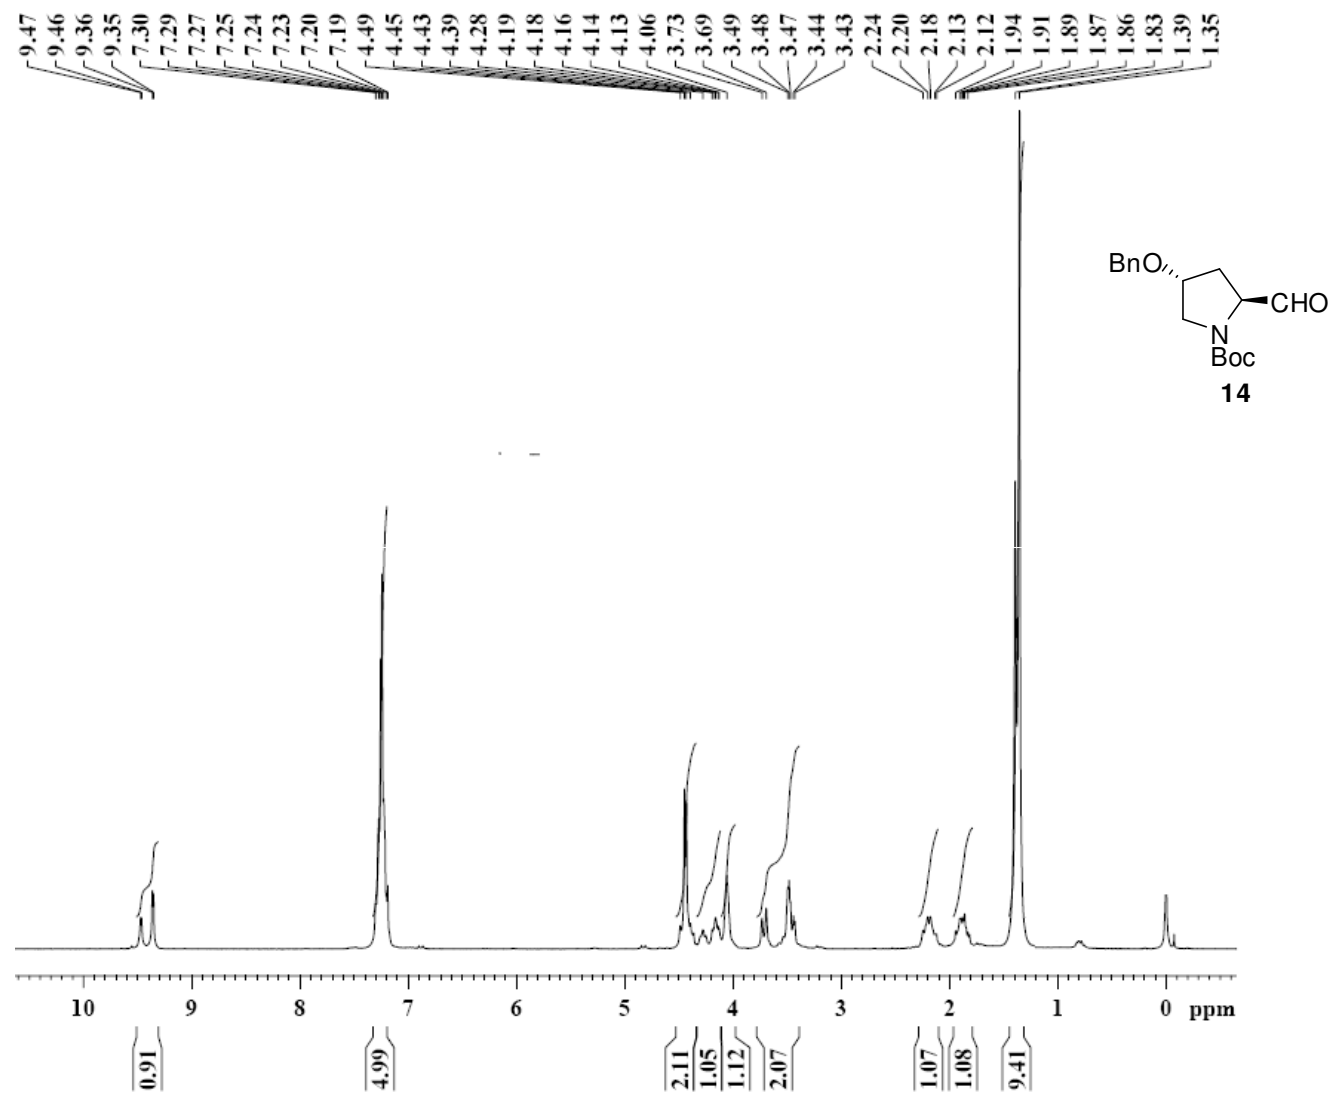

Fig.48 <sup>1</sup>H spectra of compound **14**

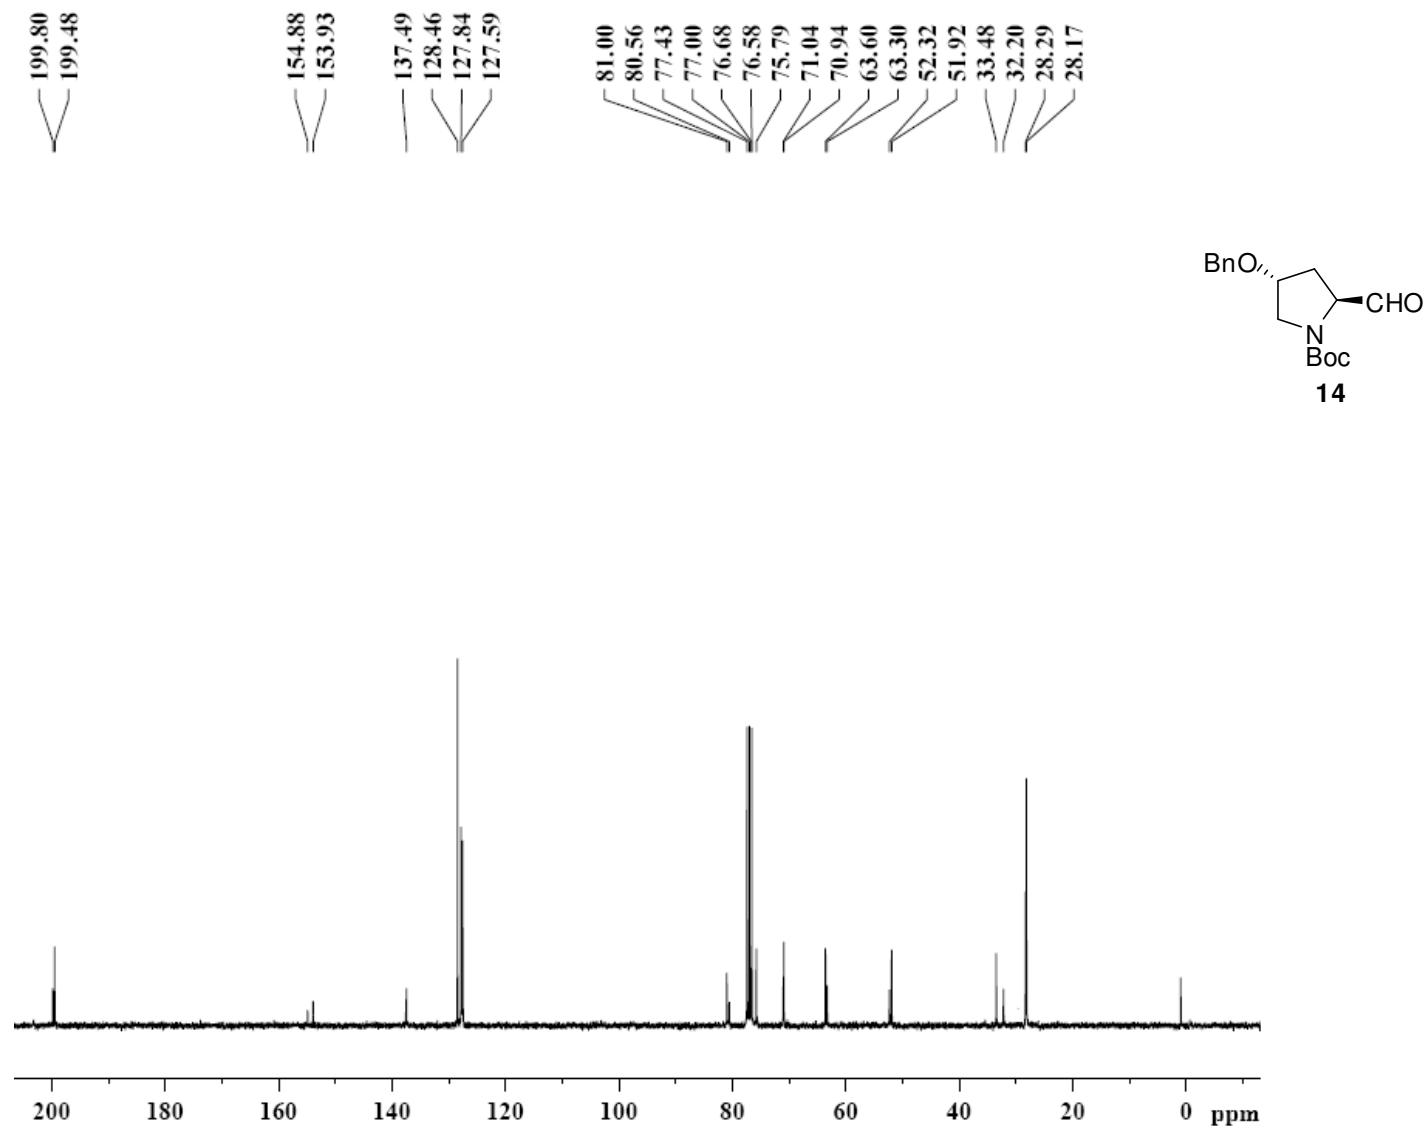

Fig.49 <sup>13</sup>C spectra of compound **14**

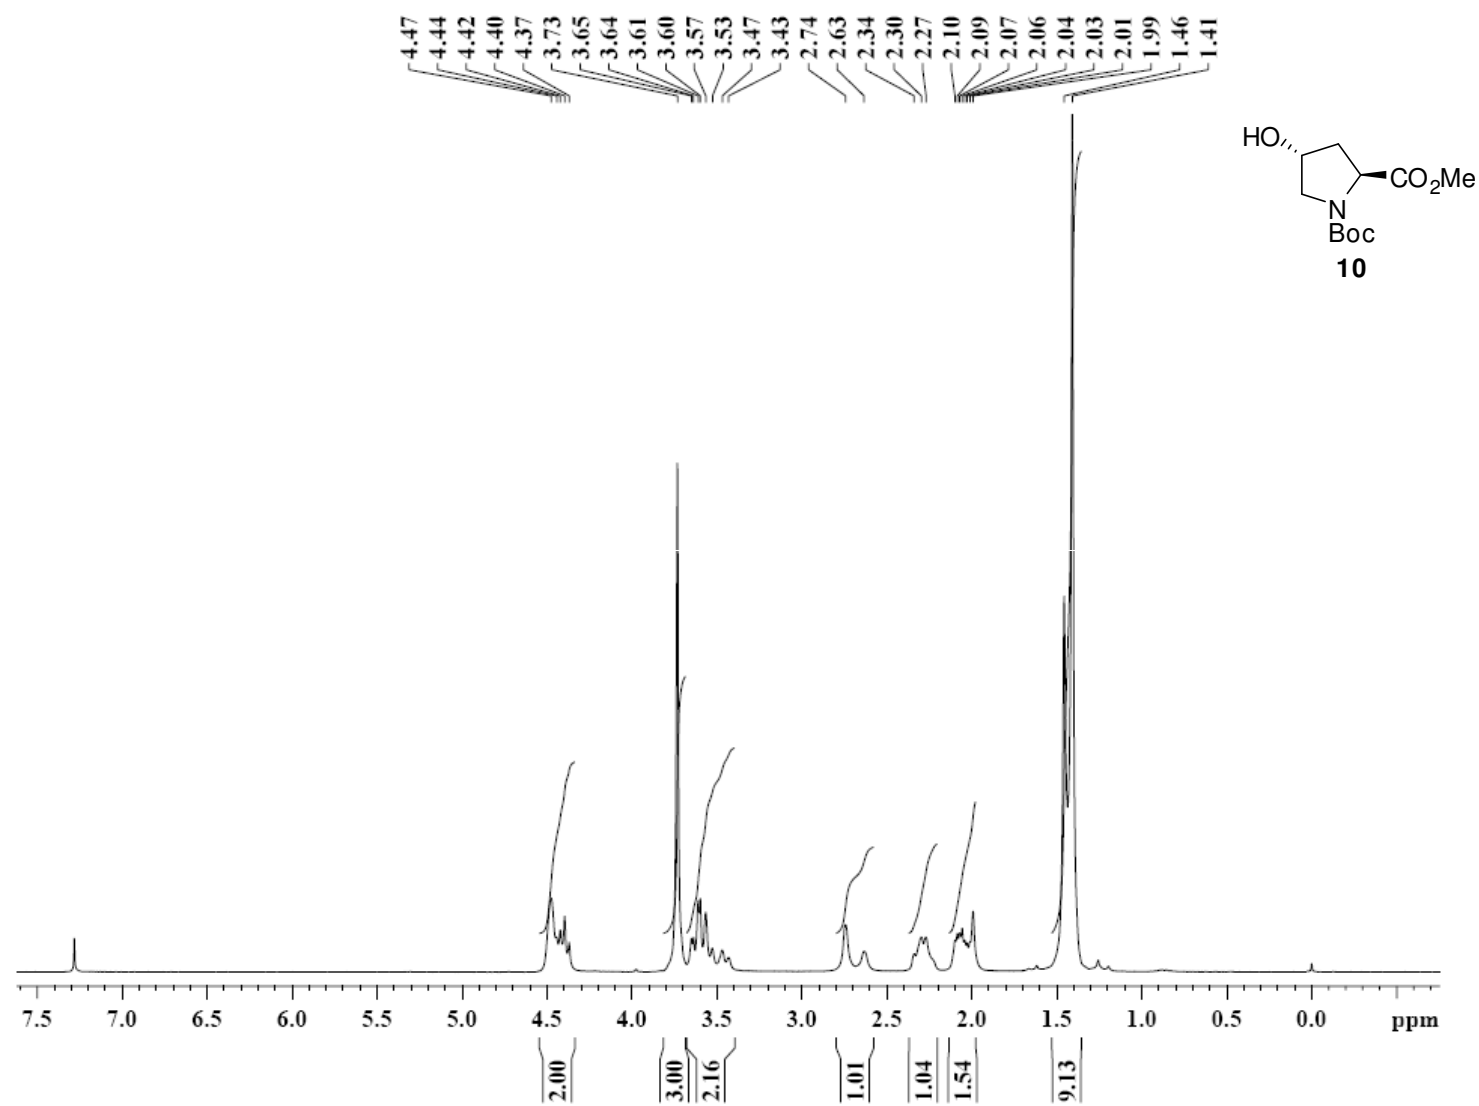

Fig.50 <sup>1</sup>H spectra of compound **10**

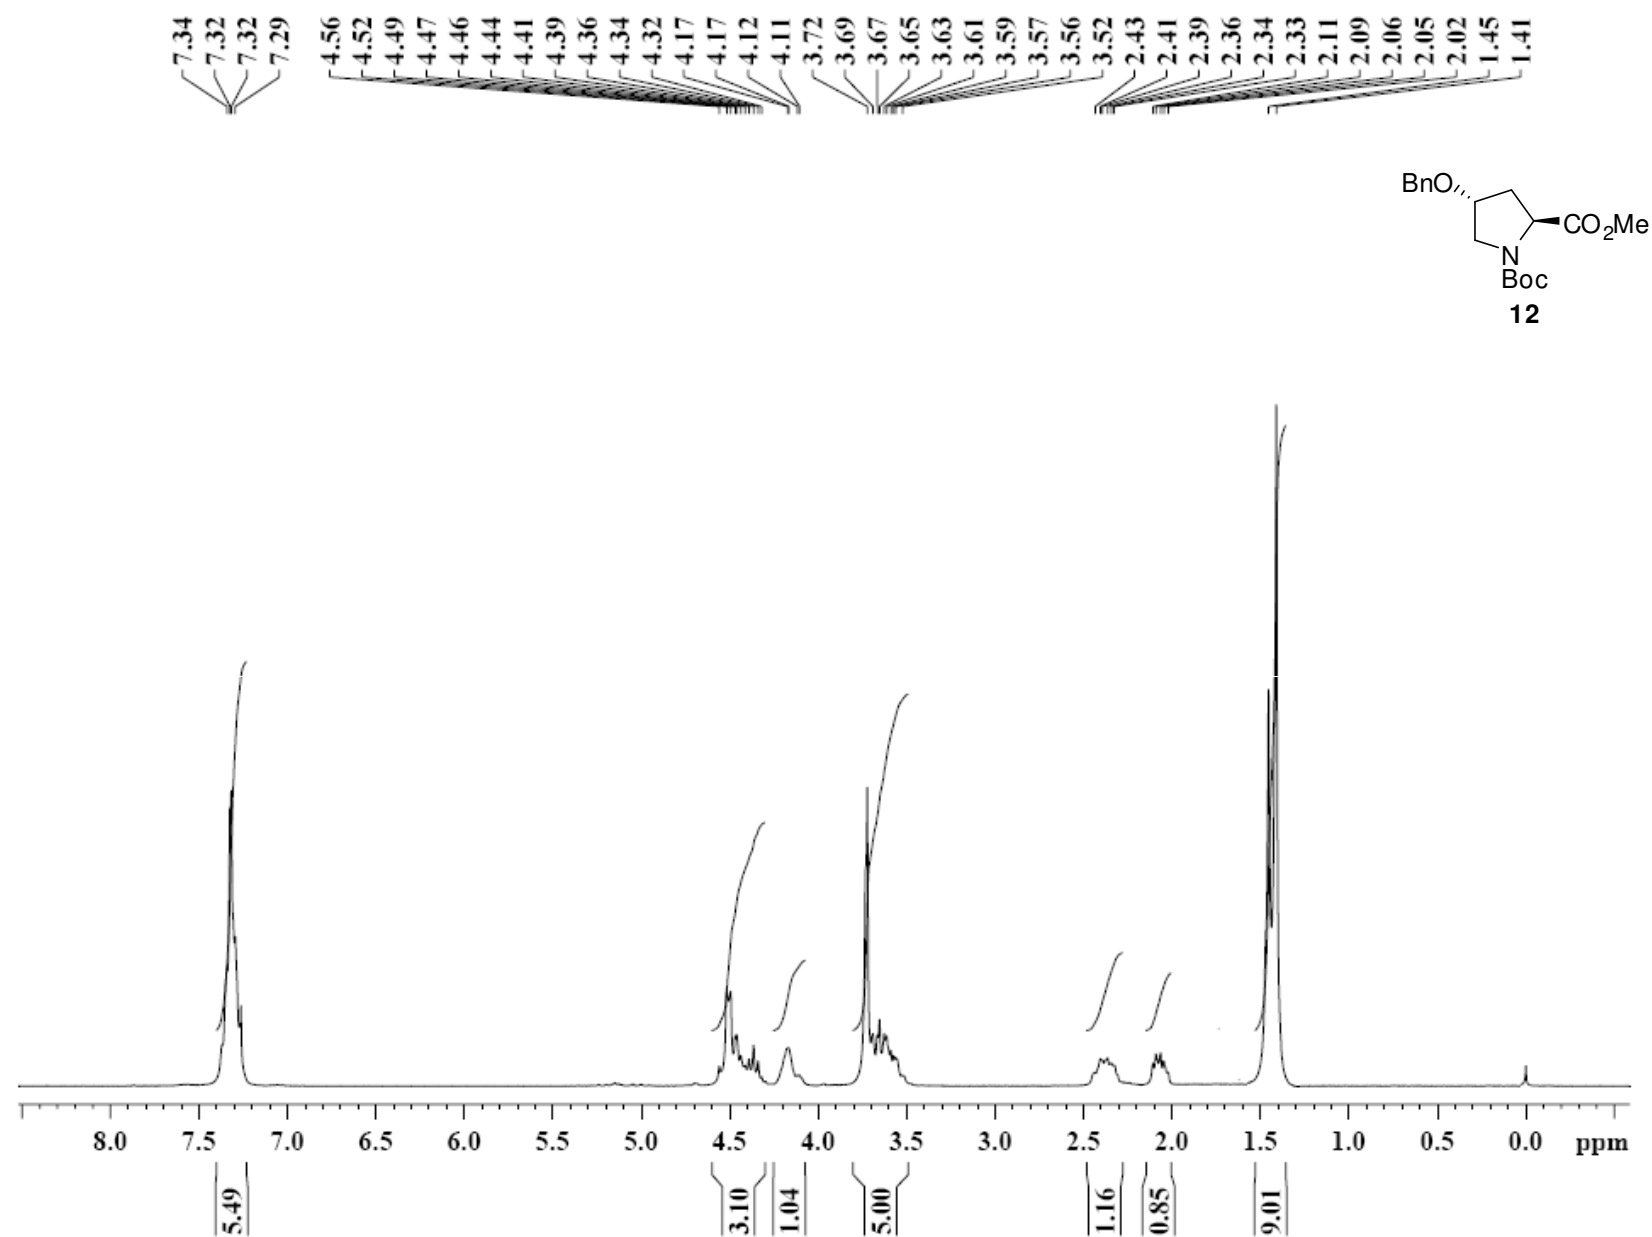

Fig.51 <sup>1</sup>H spectra of compound **12**

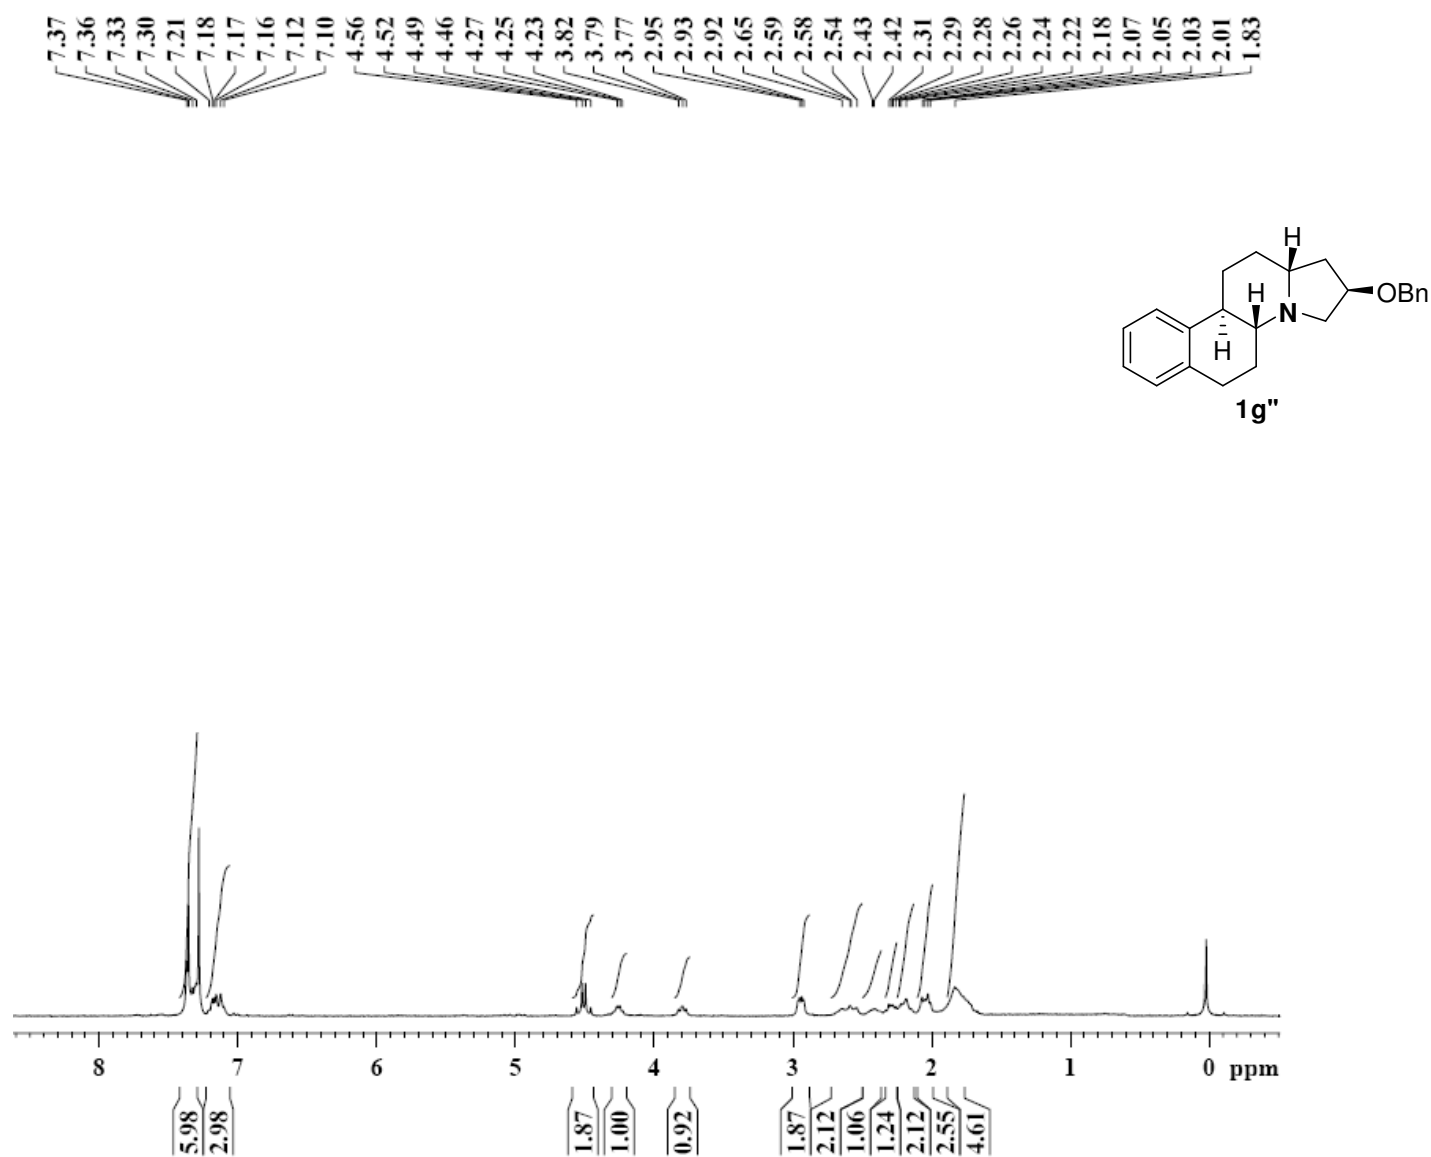

Fig.52 <sup>1</sup>H spectra of compound **1g''**

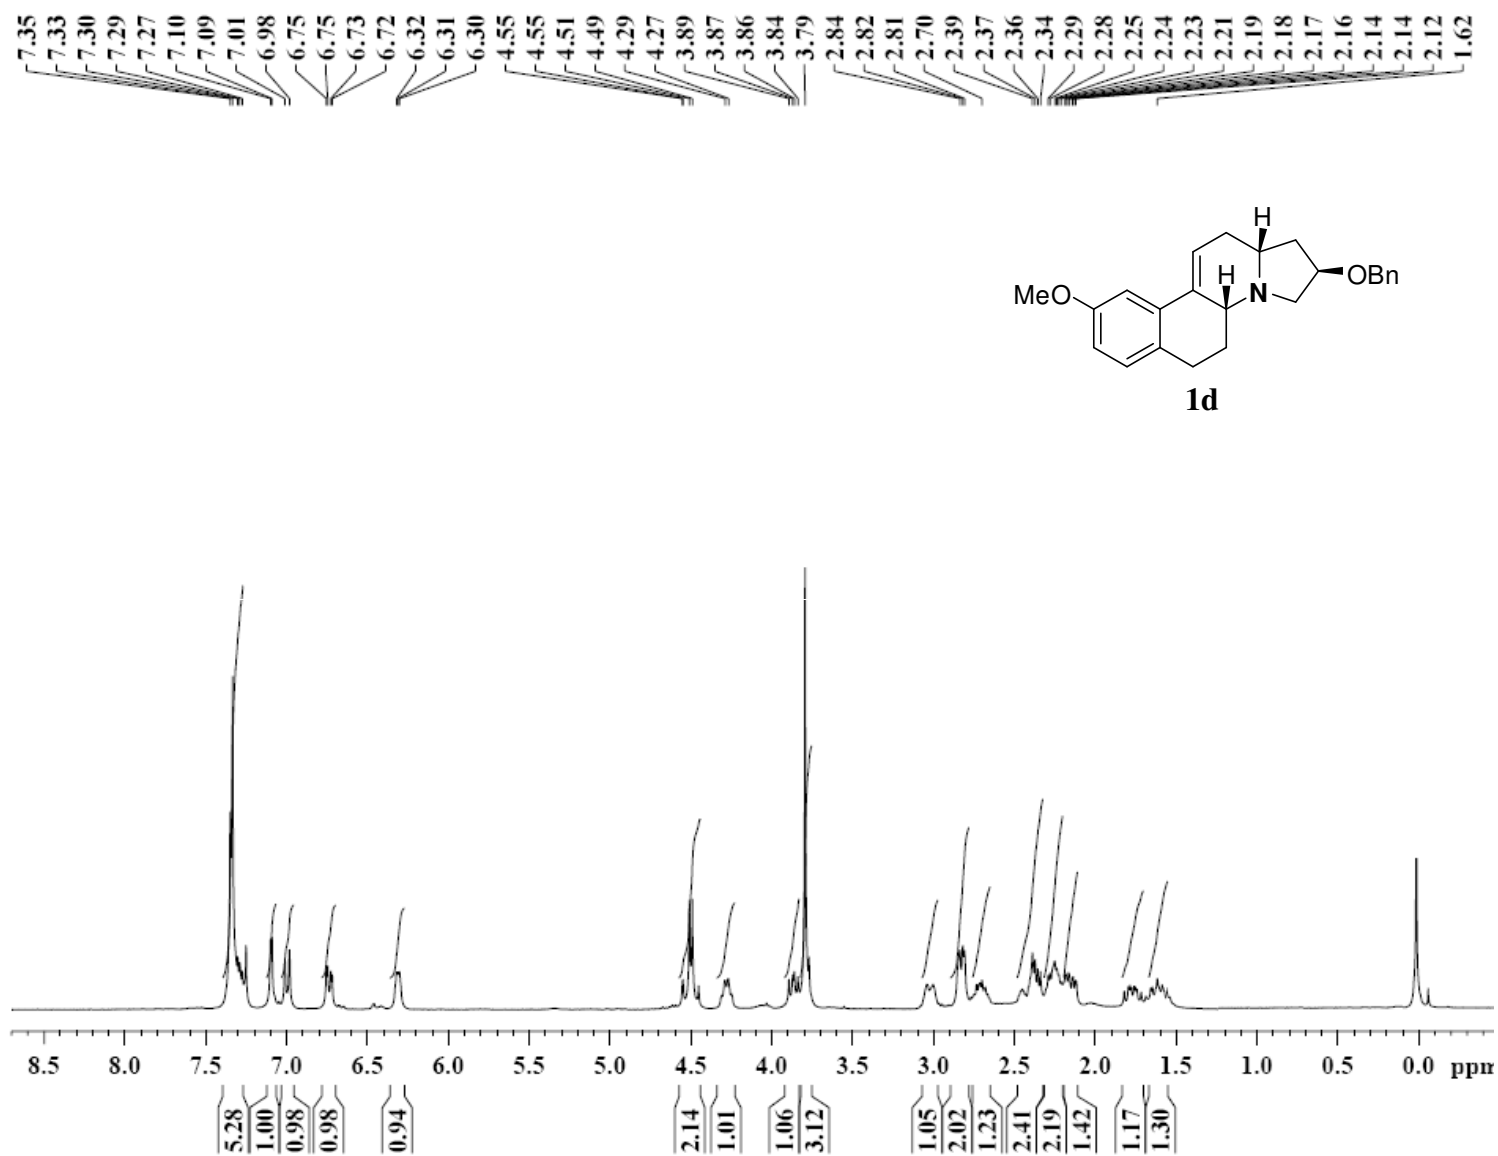

Fig.53  $^1\text{H}$  spectra of compound **1d**

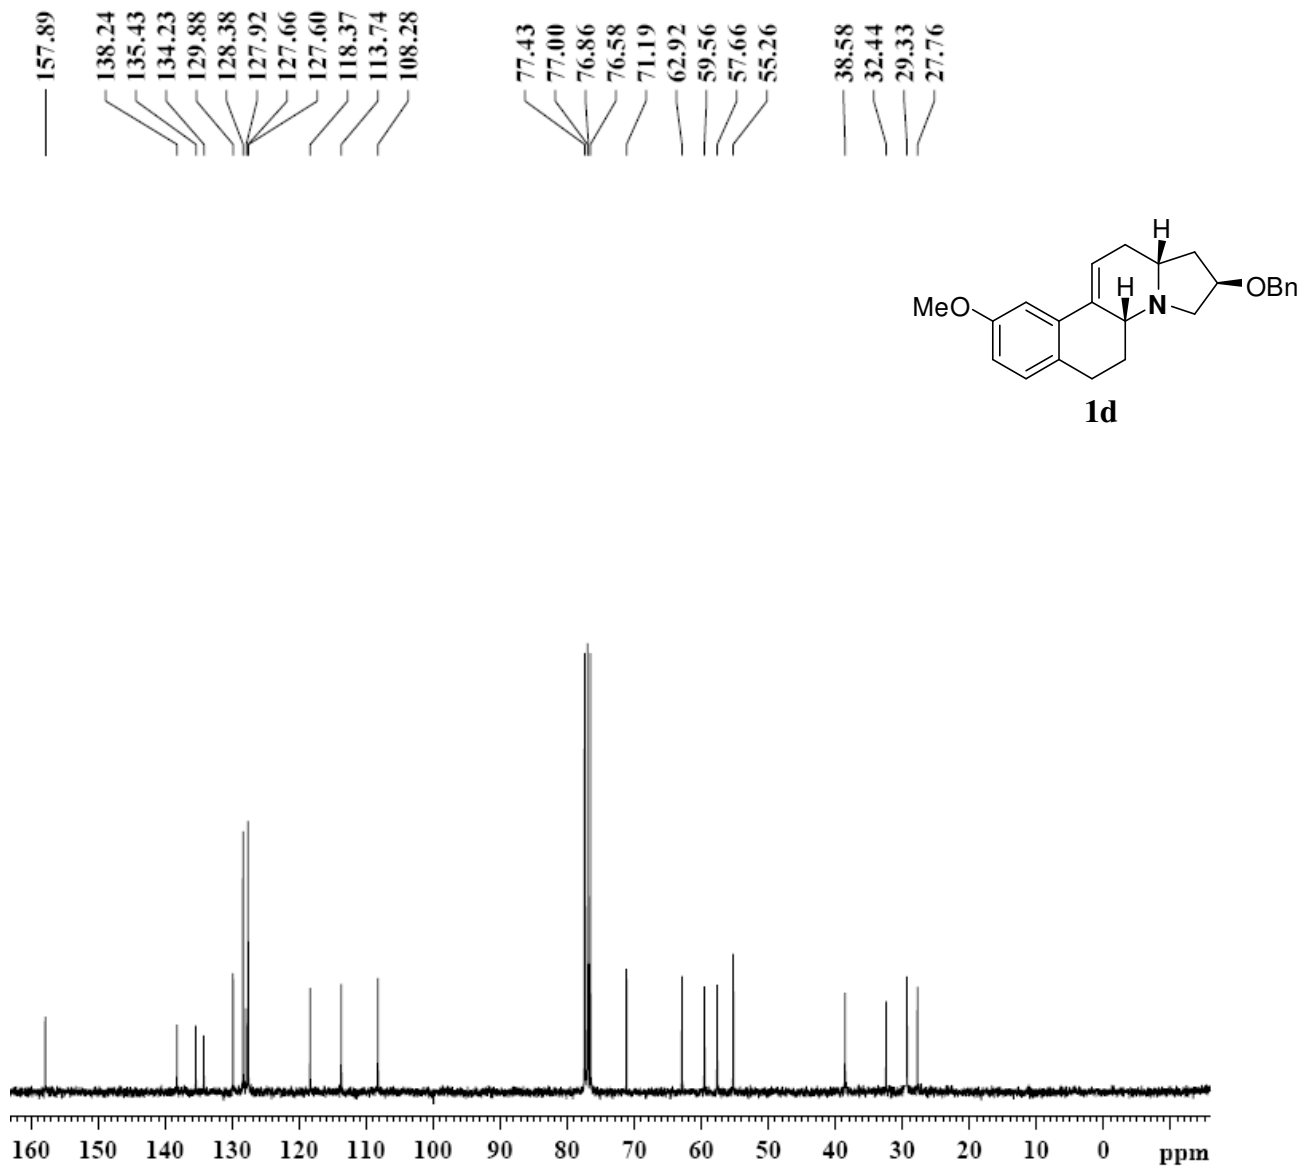

Fig.54 <sup>13</sup>C spectra of compound **1d**

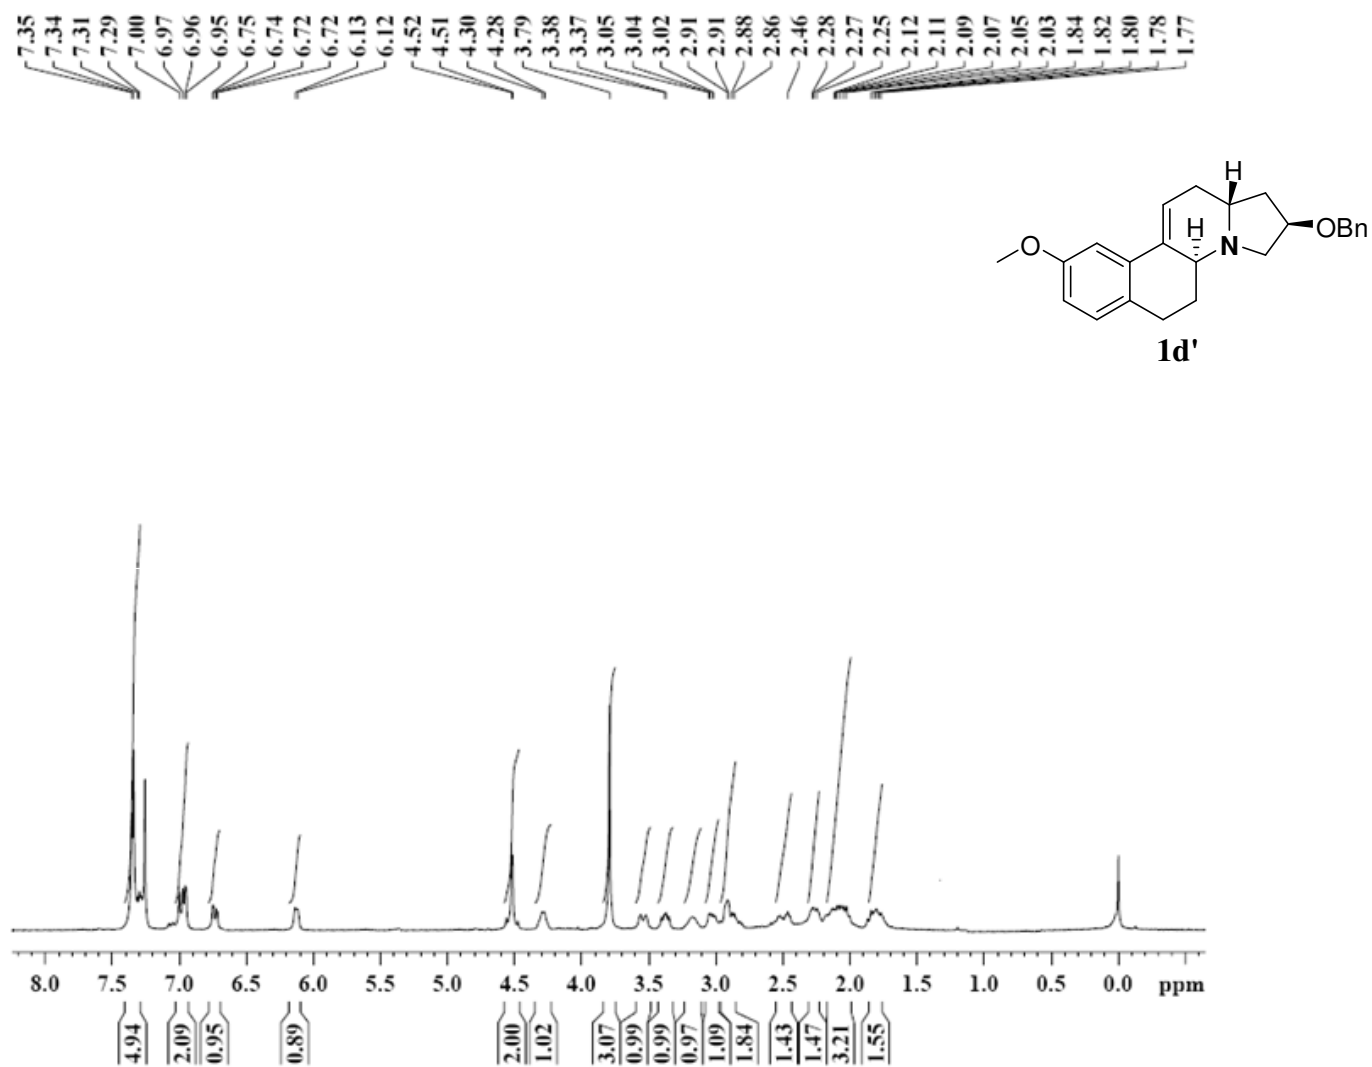

Fig.55 <sup>1</sup>H spectra of compound **1d'**

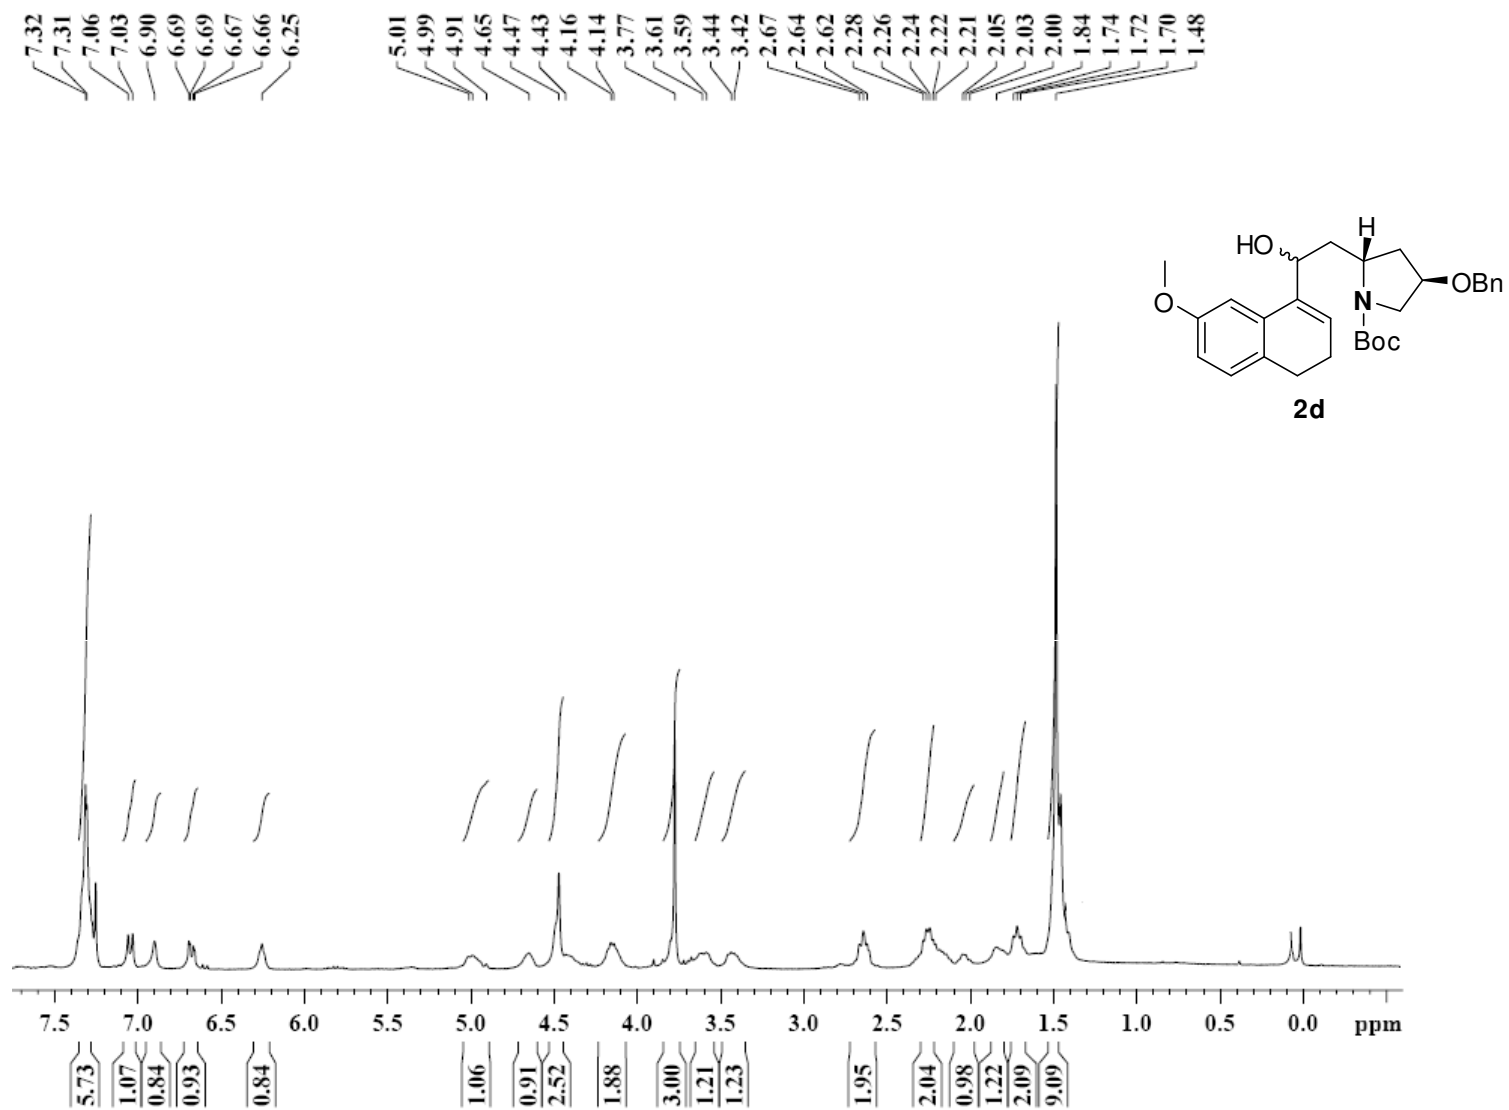

Fig.56  $^1\text{H}$  spectra of compound **2d**

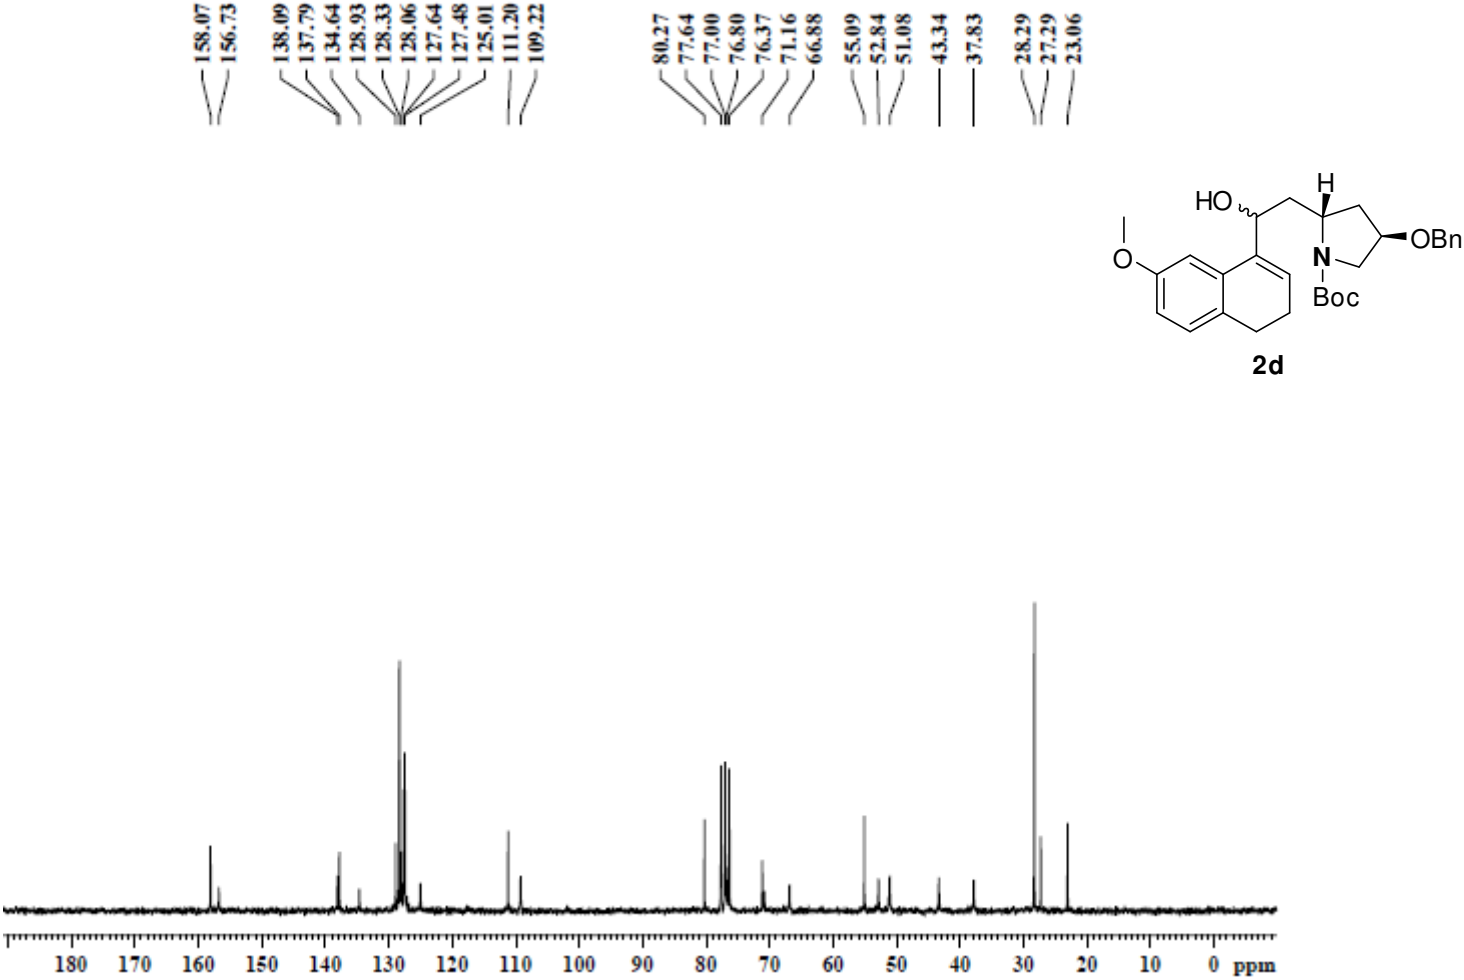

Fig.57  $^{13}\text{C}$  spectra of compound **2d**

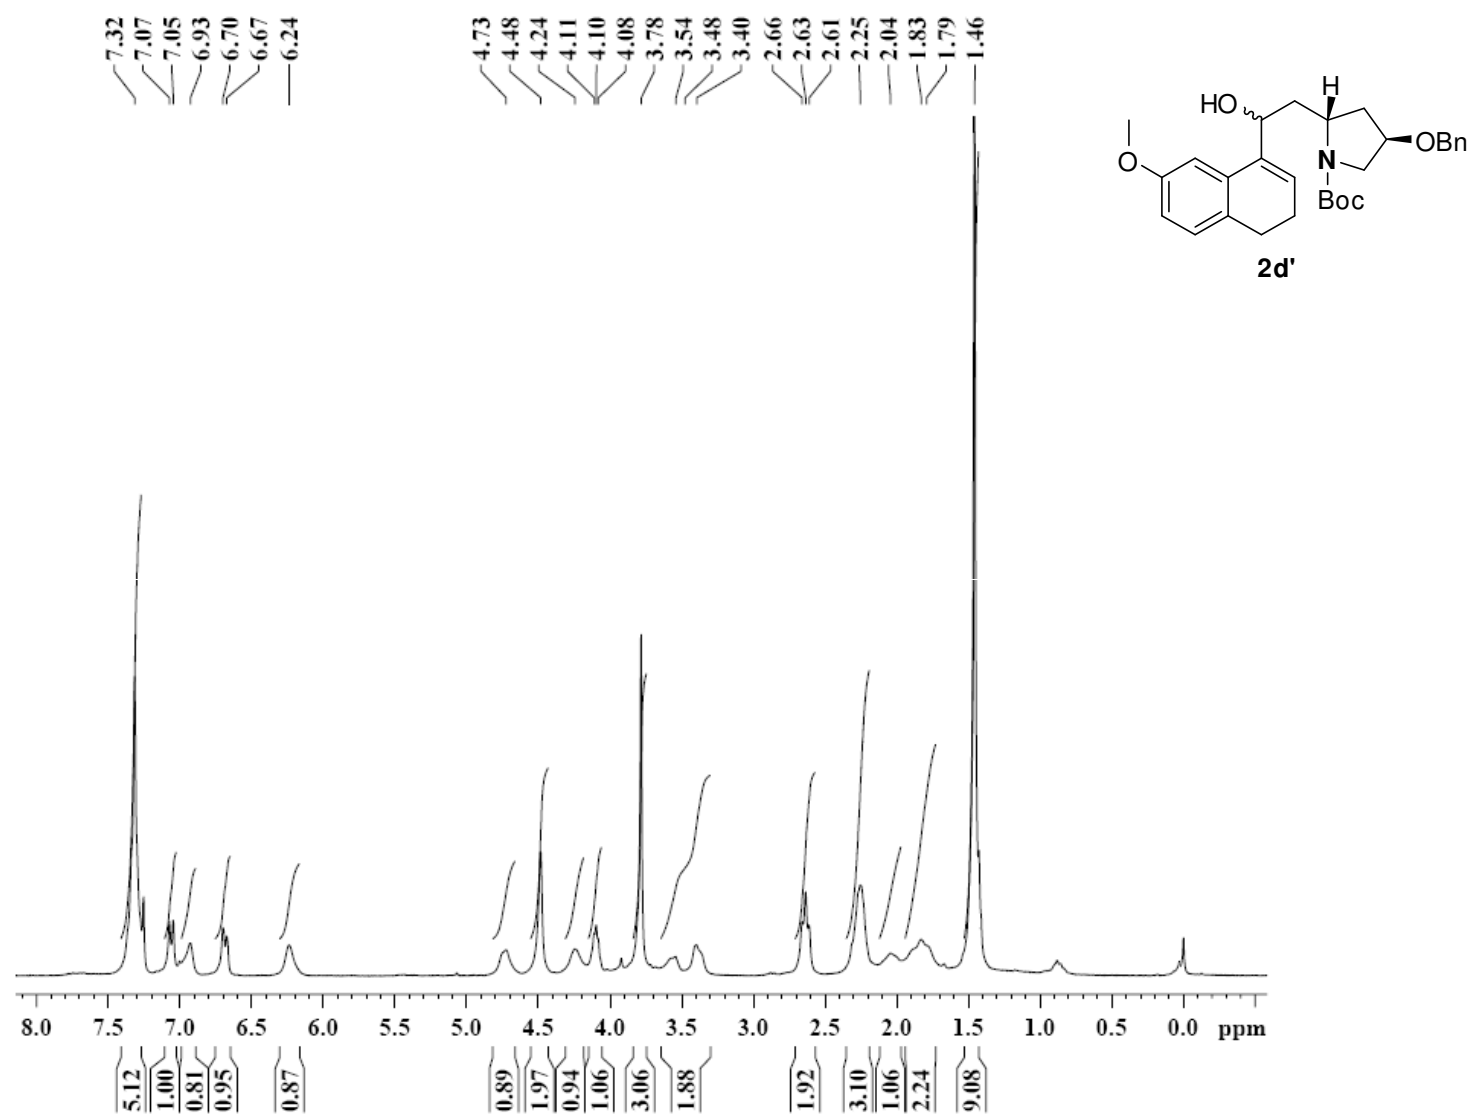

Fig.58 <sup>1</sup>H spectra of compound **2d'**

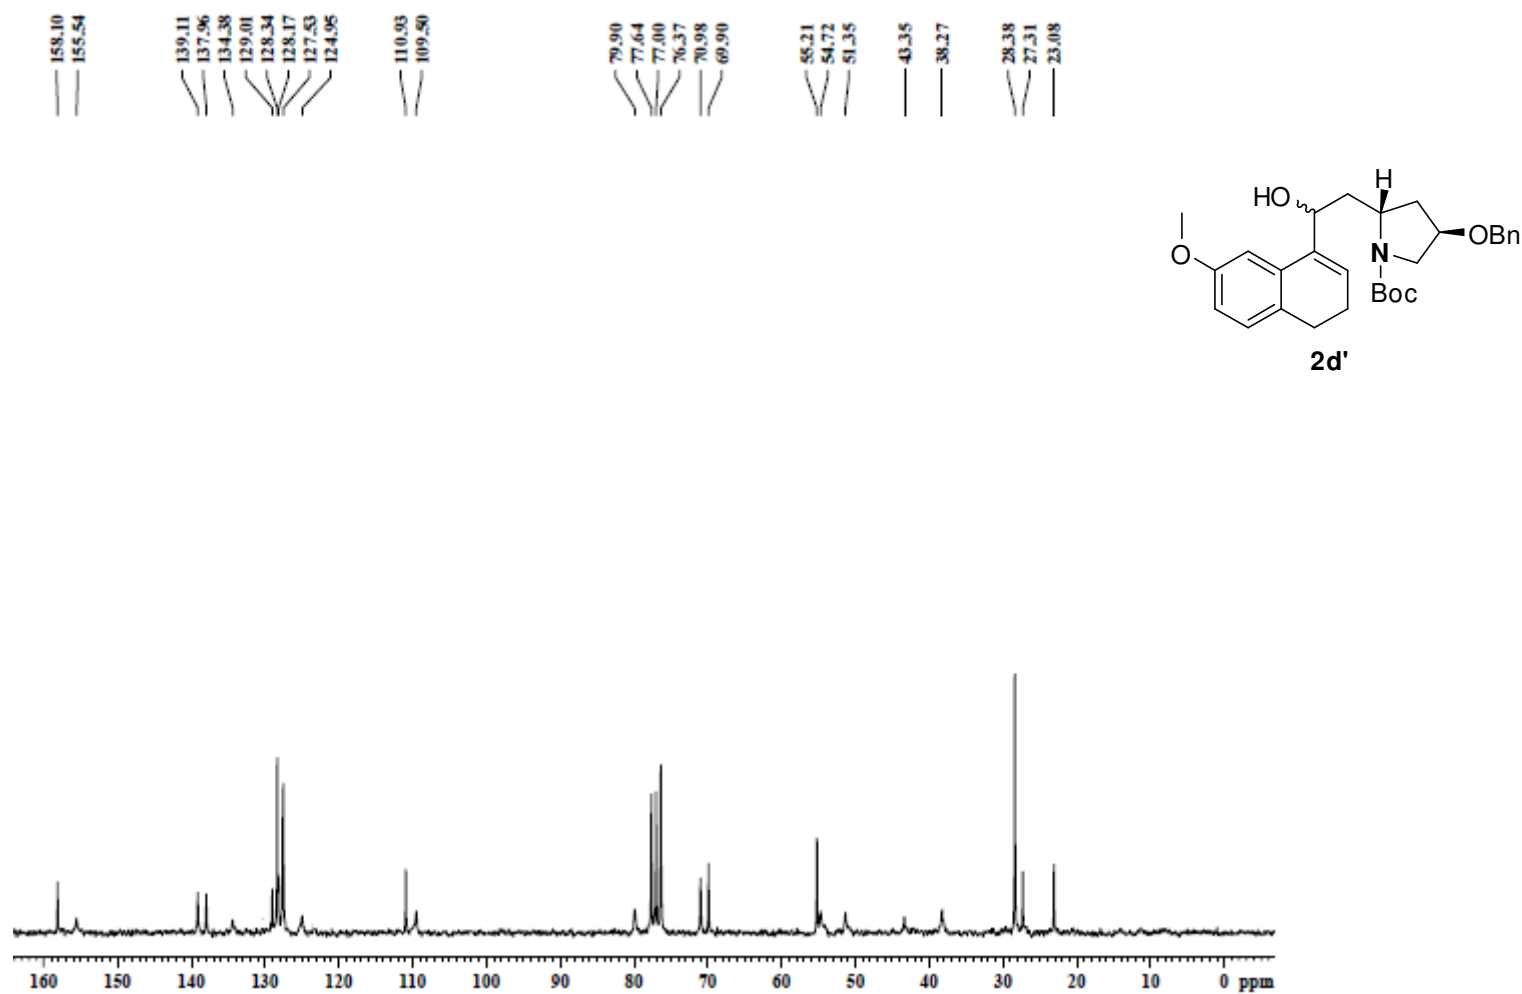

Fig.5 <sup>13</sup>C spectra of compound **2d'**

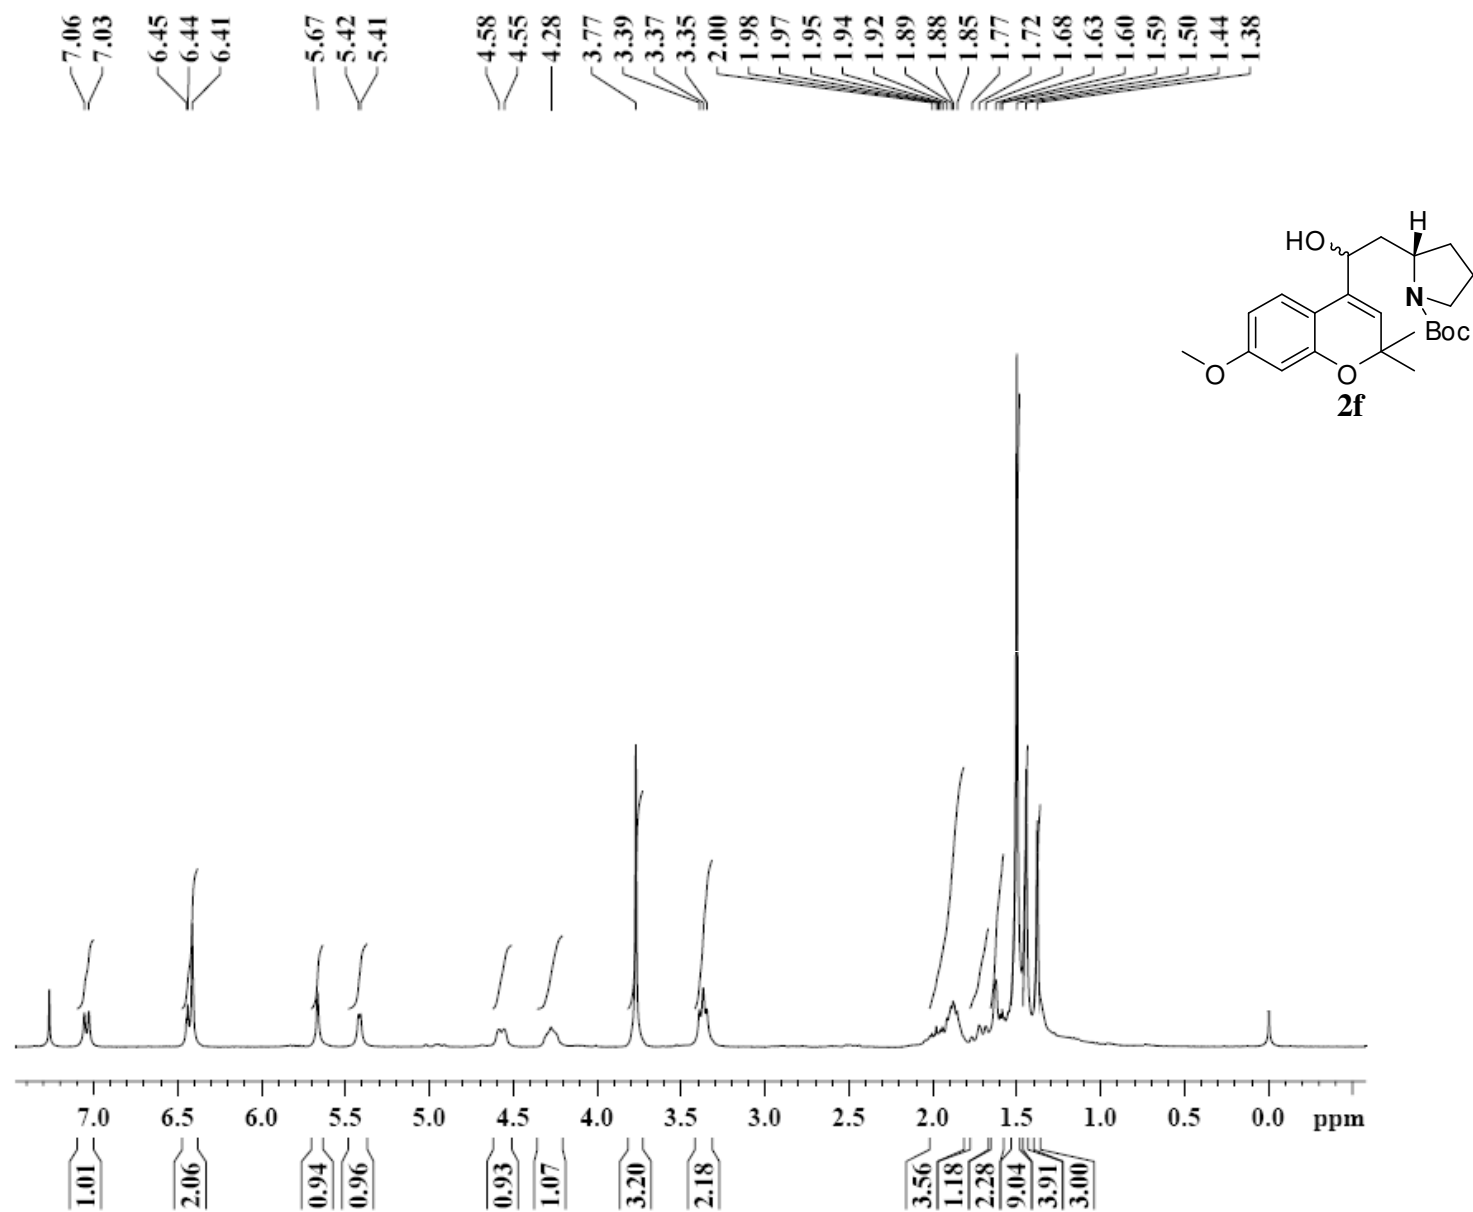

Fig.60  $^1\text{H}$  spectra of compound **2f**

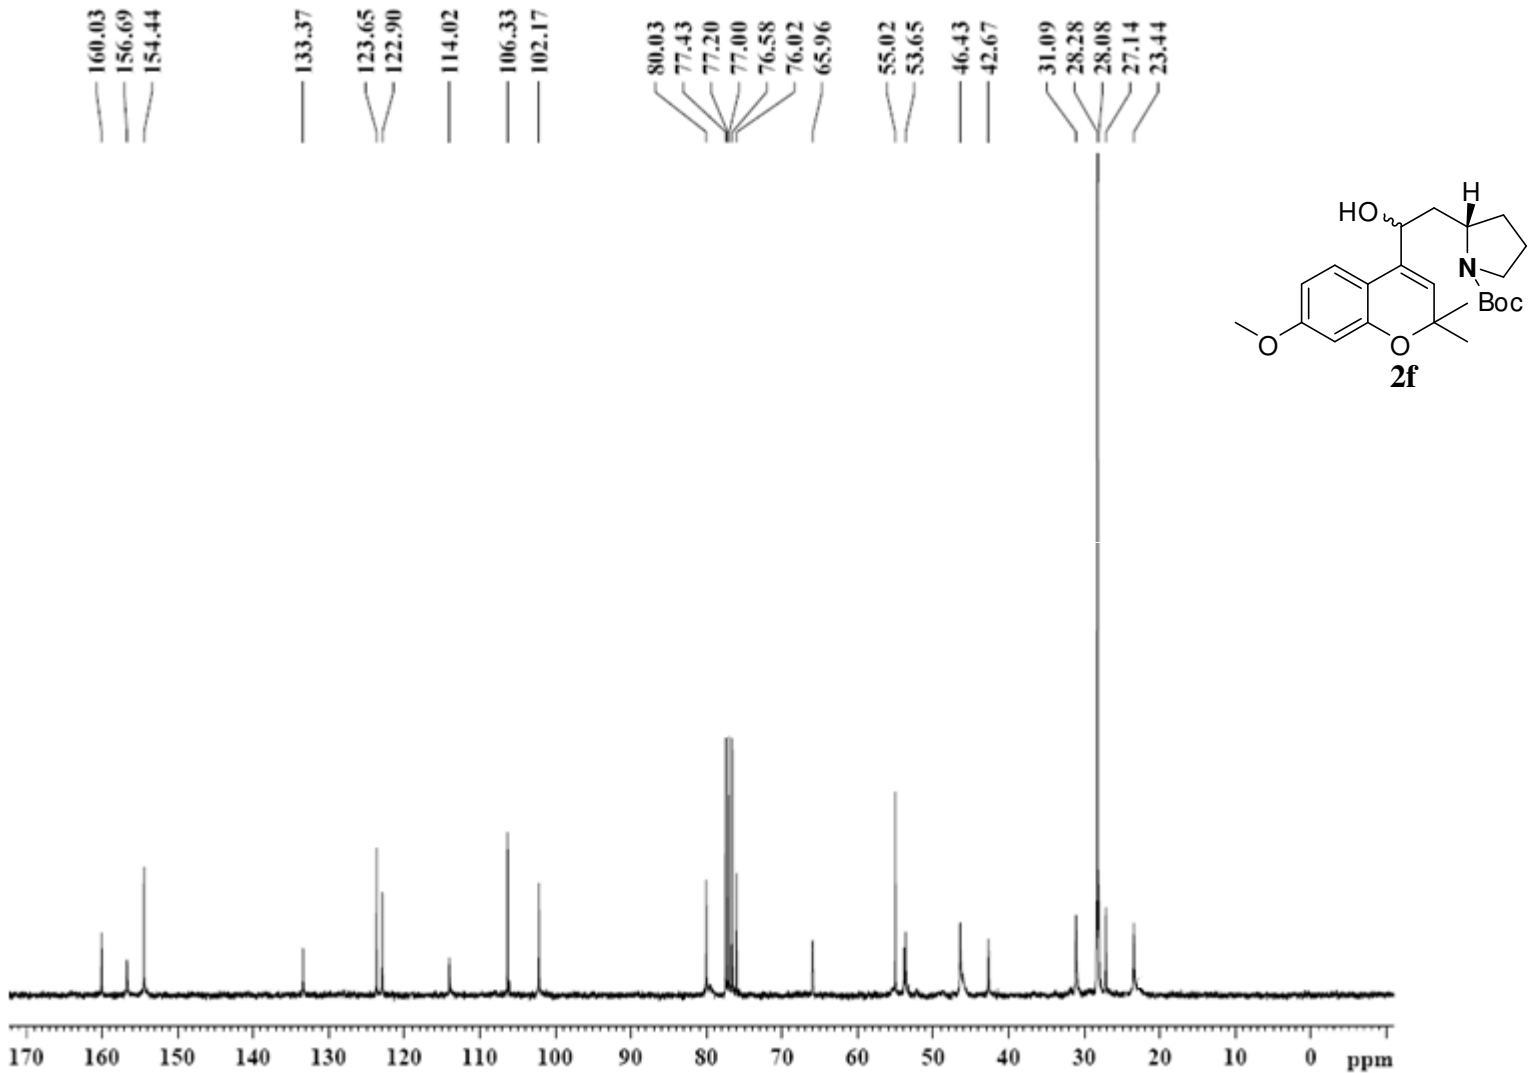

Fig.61  $^{13}\text{C}$  spectra of compound **2f**

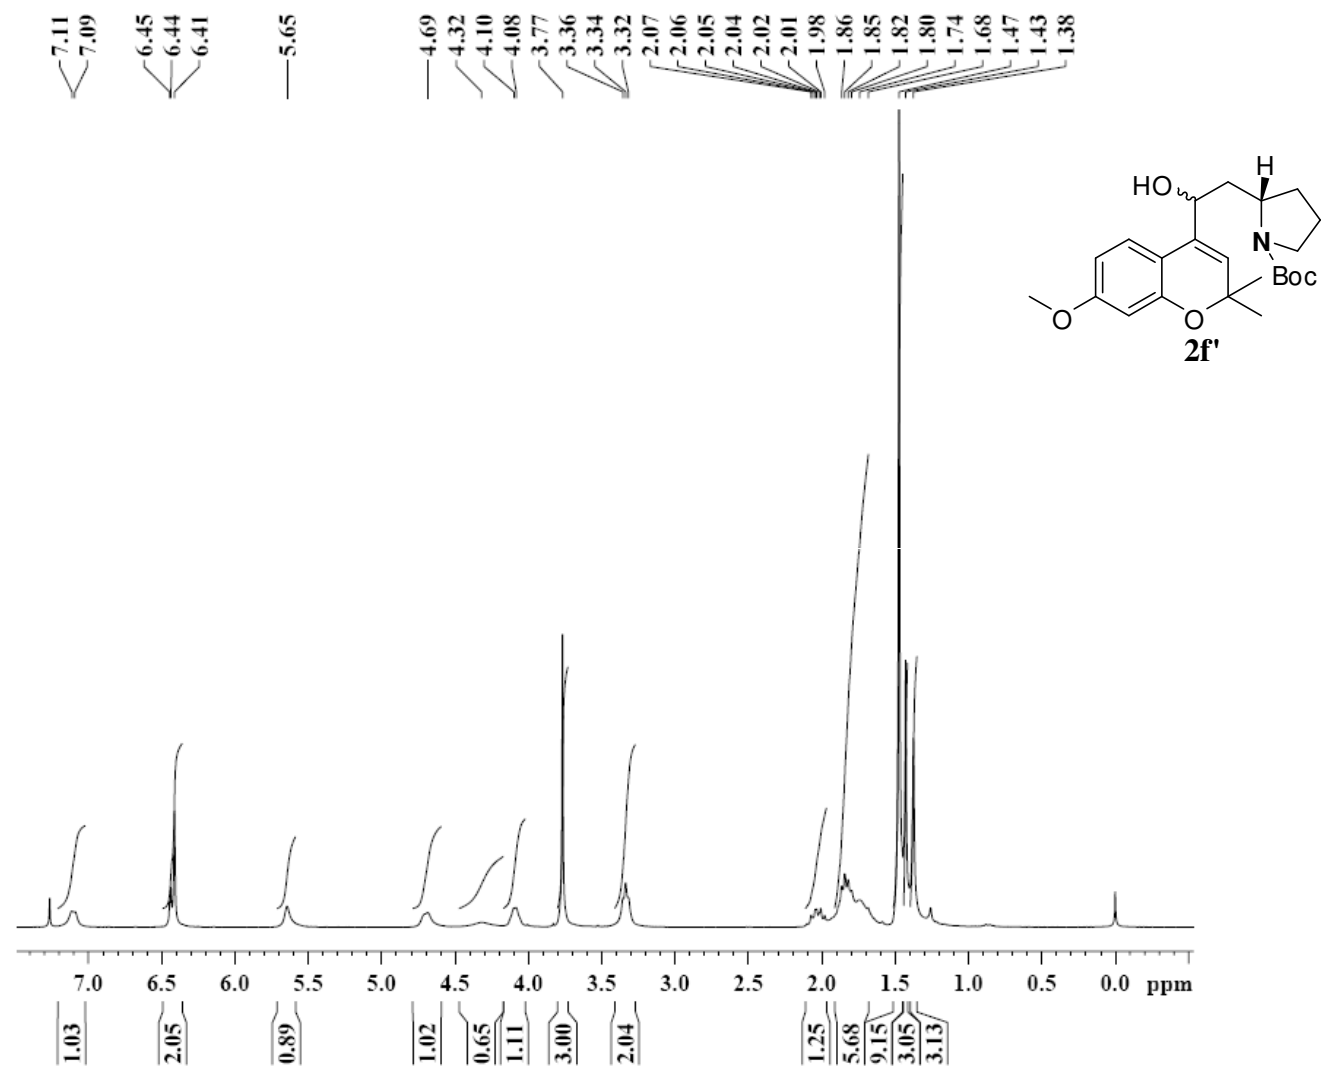

Fig.62 <sup>1</sup>H spectra of compound 2f'

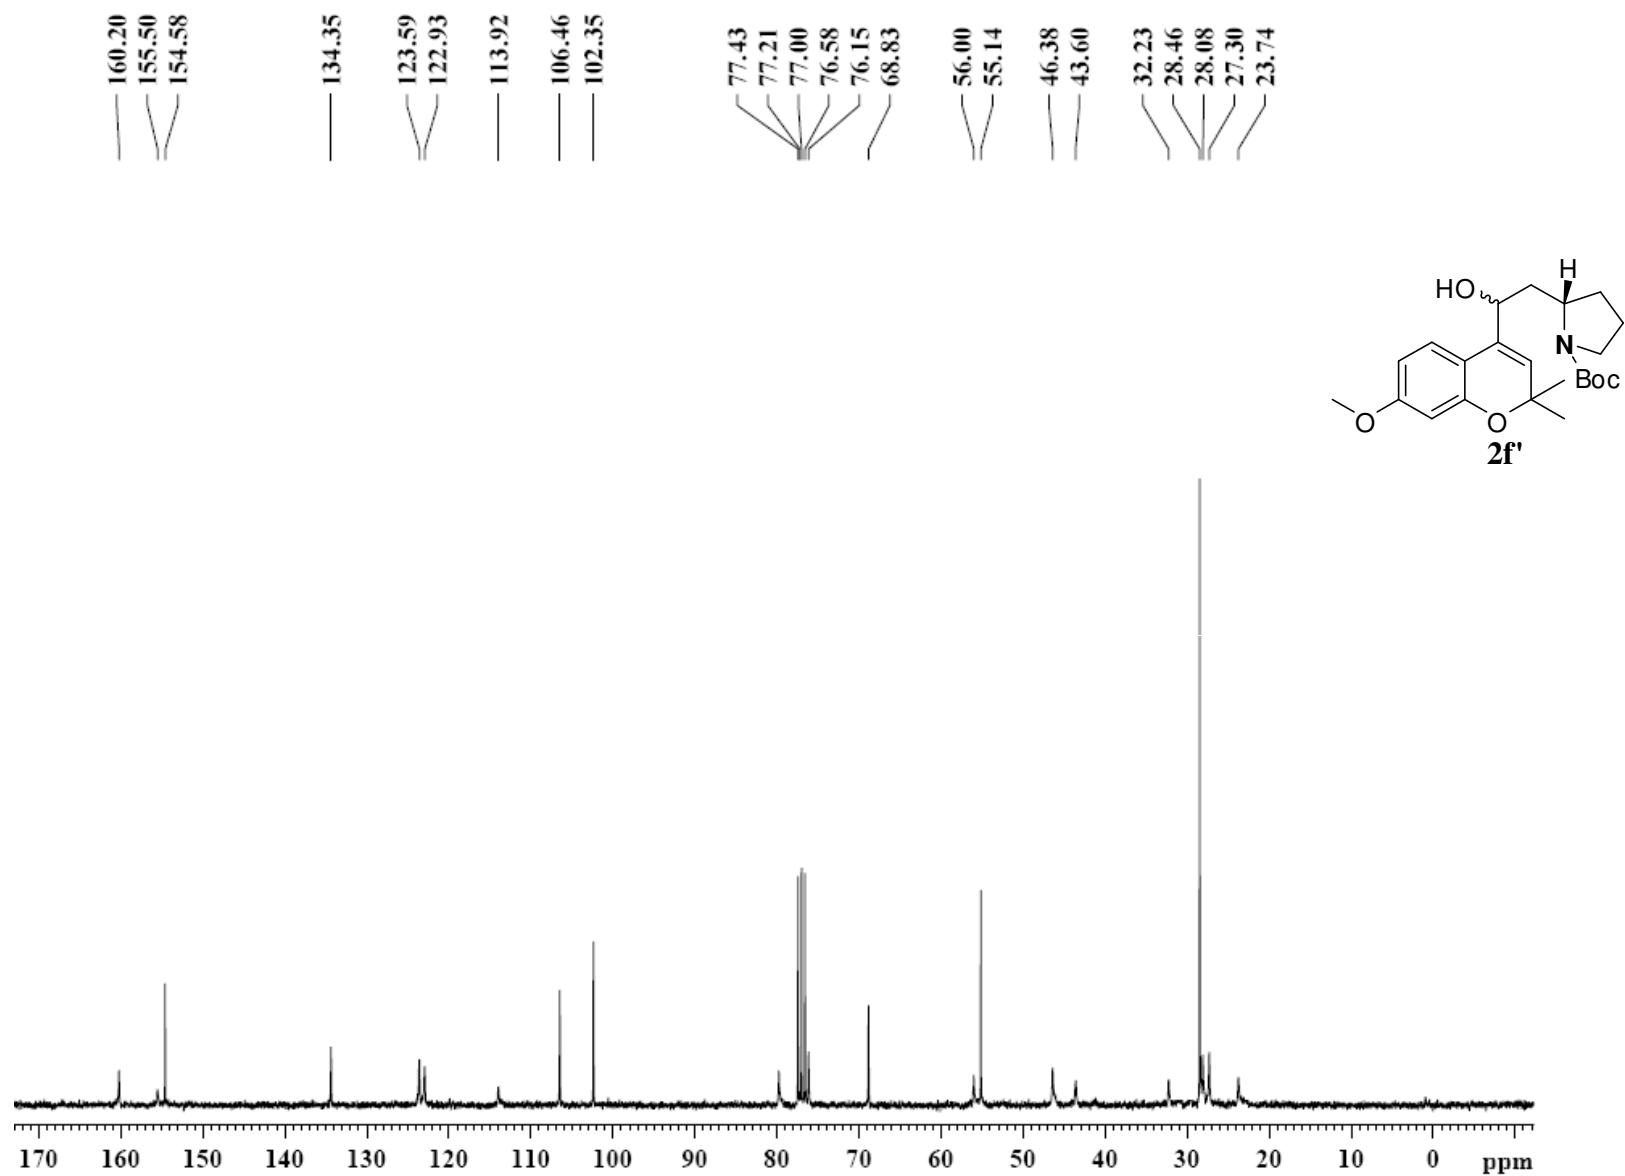

Fig.63  $^{13}\text{C}$  spectra of compound **2f'**

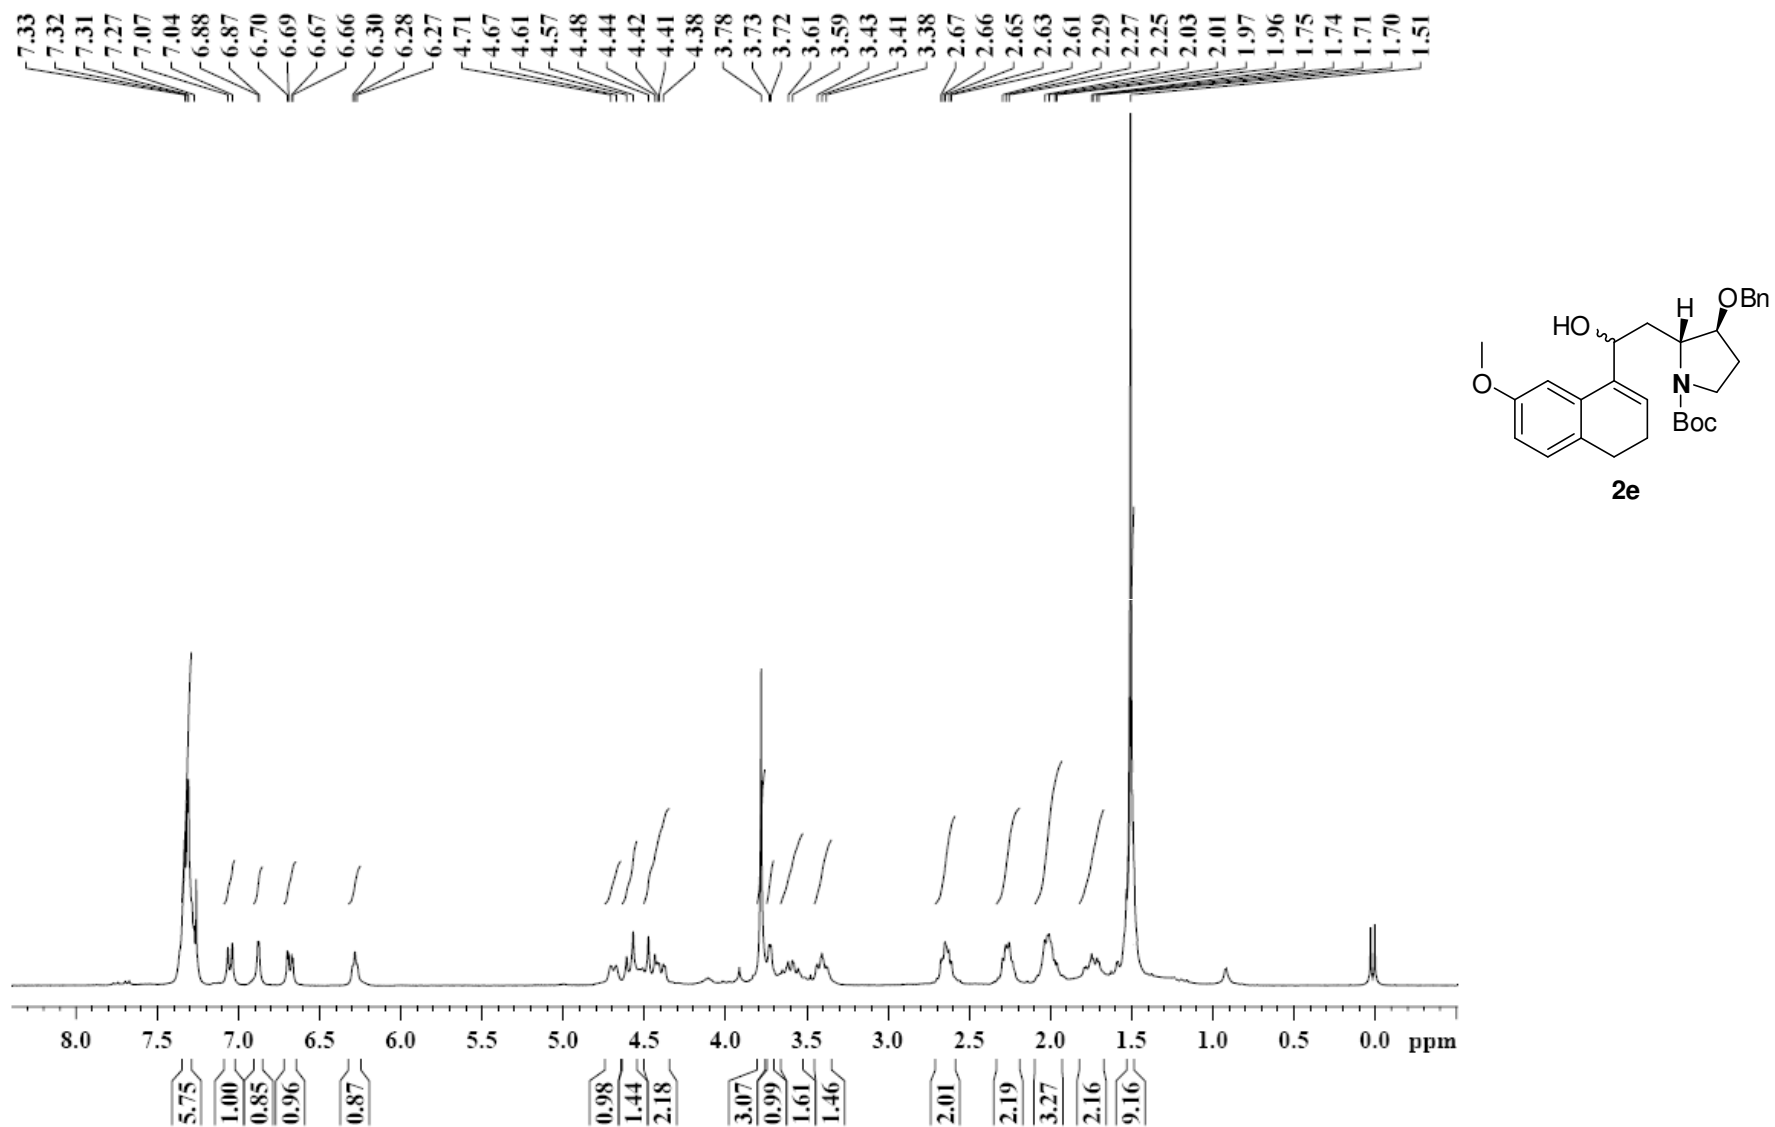

Fig.64  $^1\text{H}$  spectra of compound **2e**

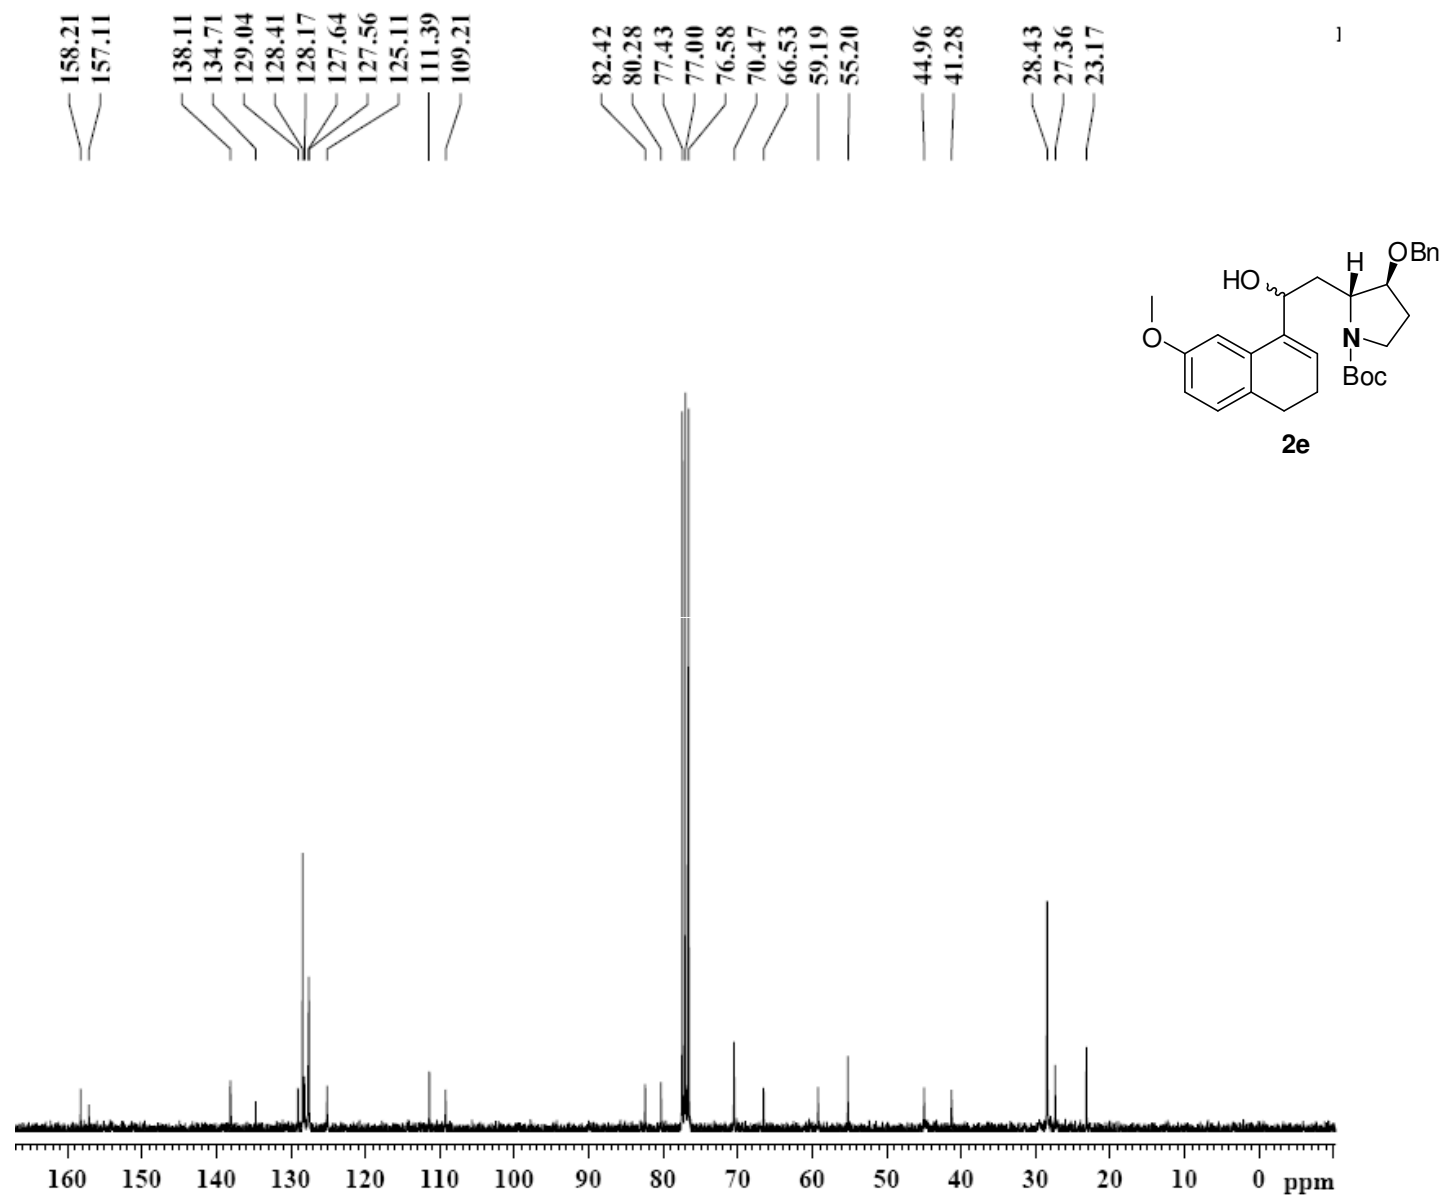

Fig.65 <sup>13</sup>C spectra of compound **2e**

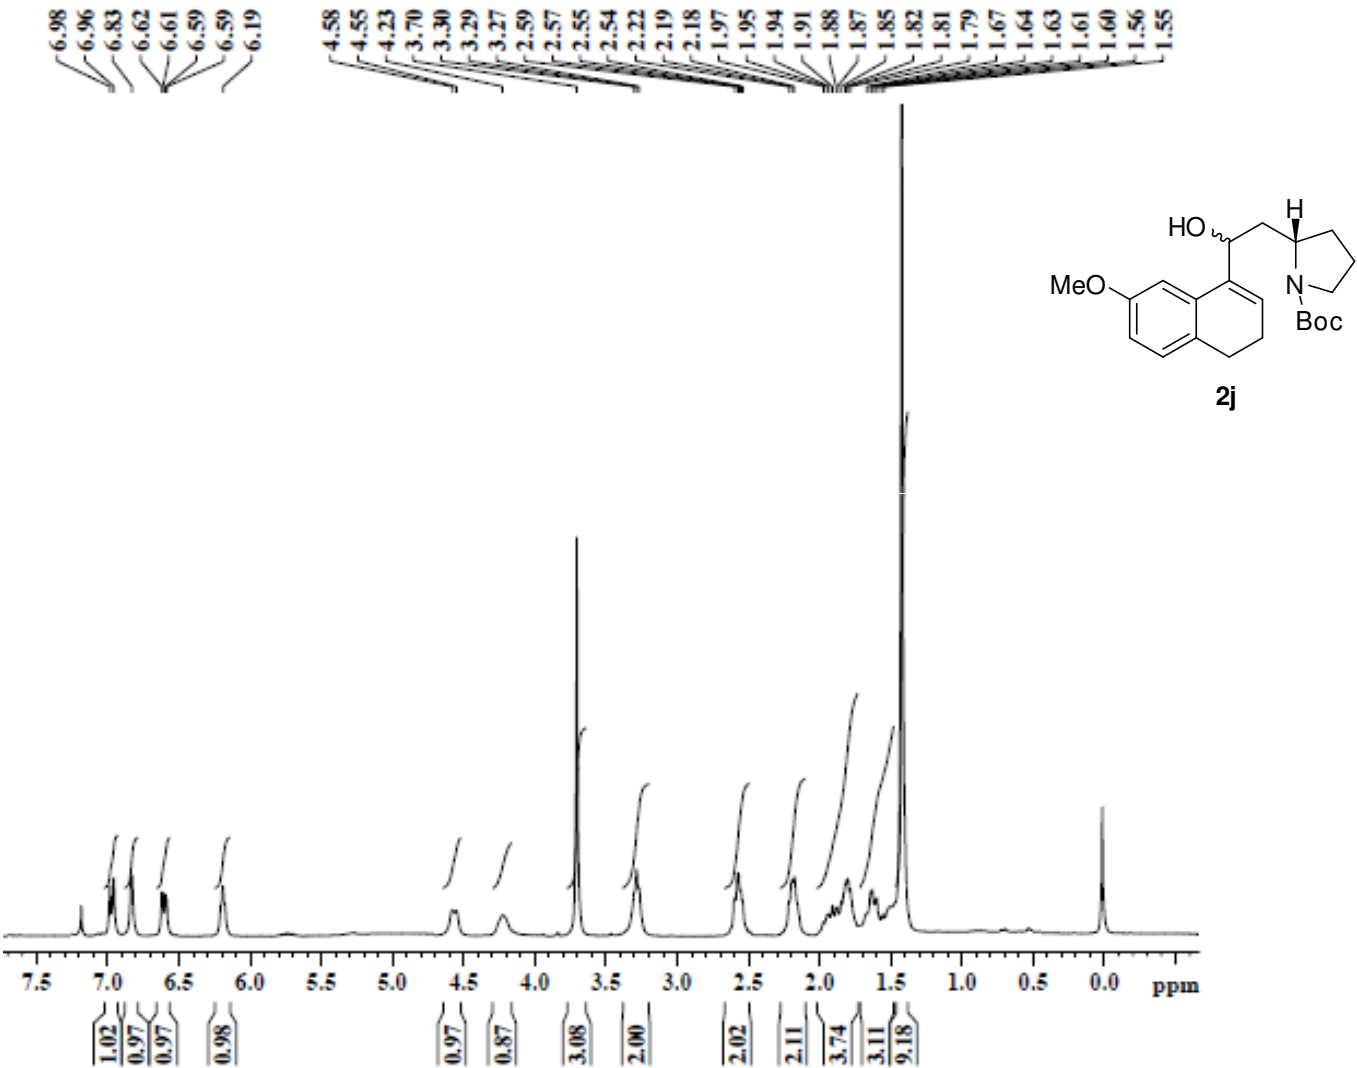

Fig.66 <sup>1</sup>H spectra of compound **2j**

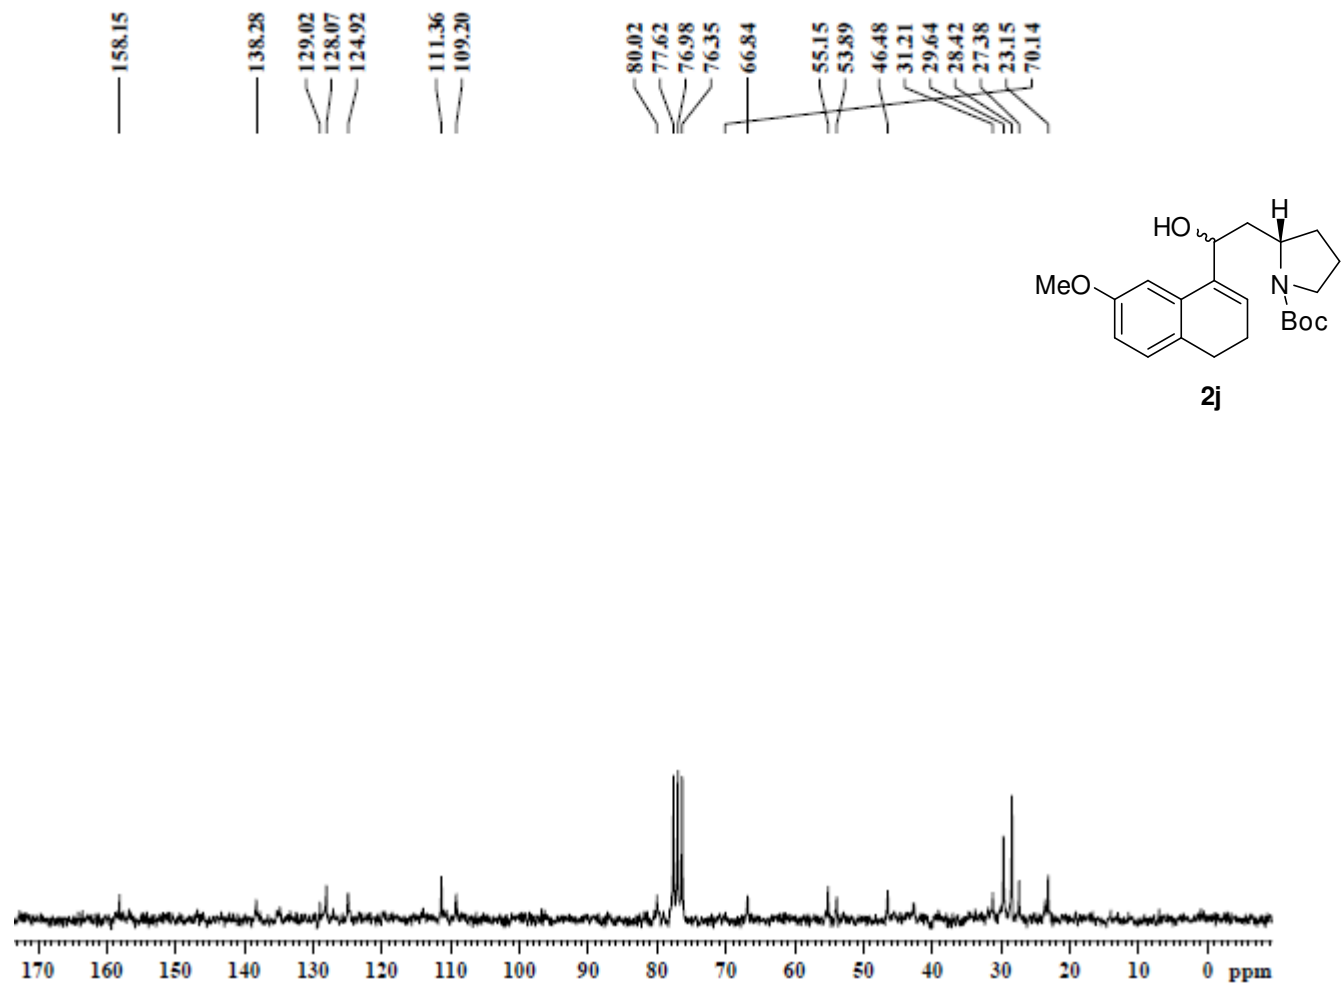

Fig.67  $^{13}\text{C}$  spectra of compound **2j**

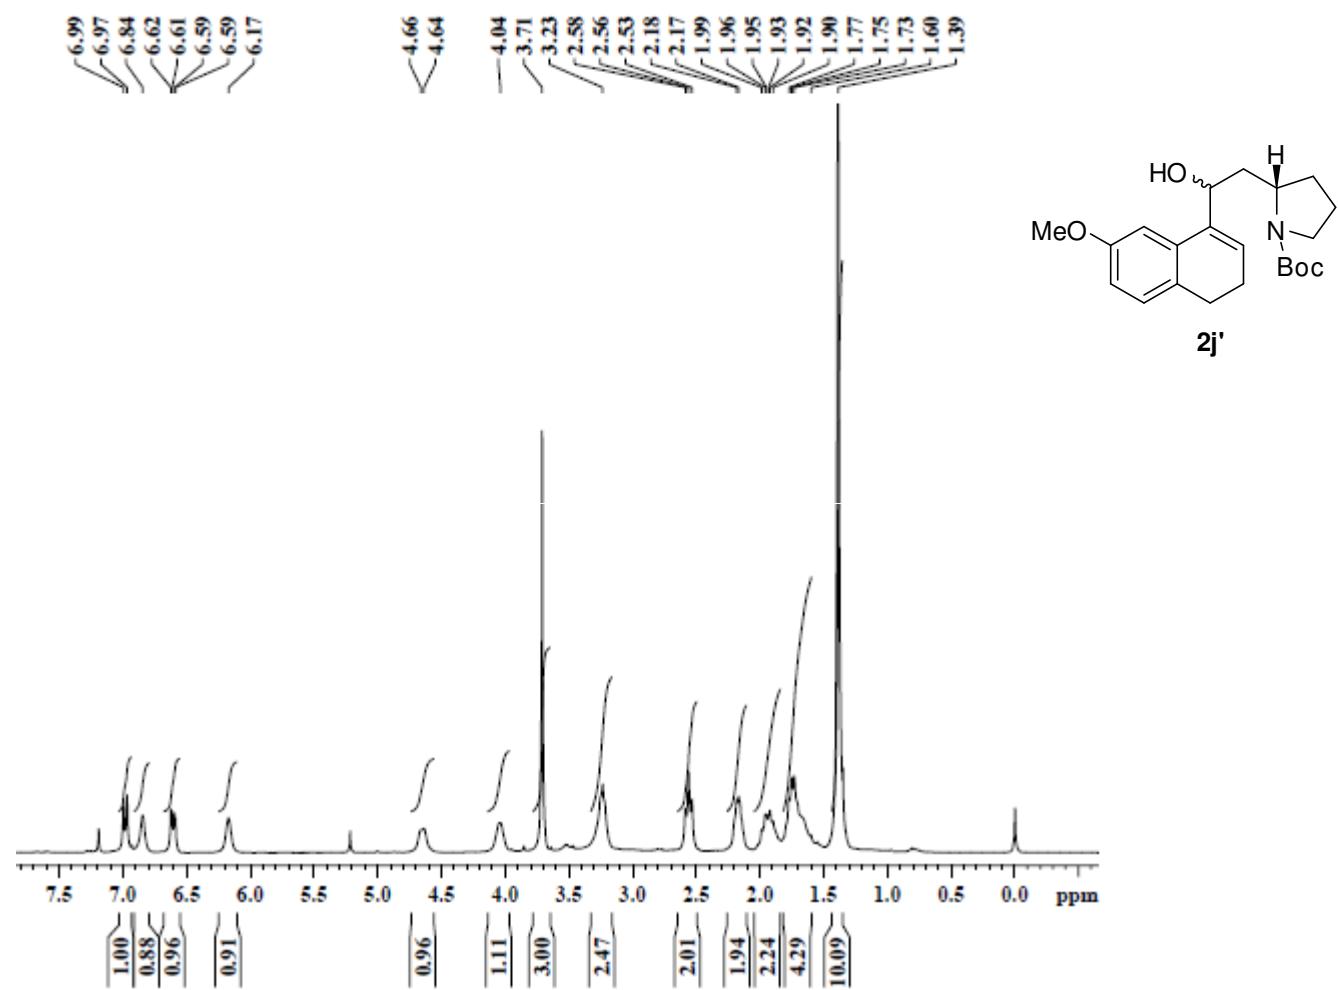

Fig.68  $^1\text{H}$  spectra of compound **2j'**

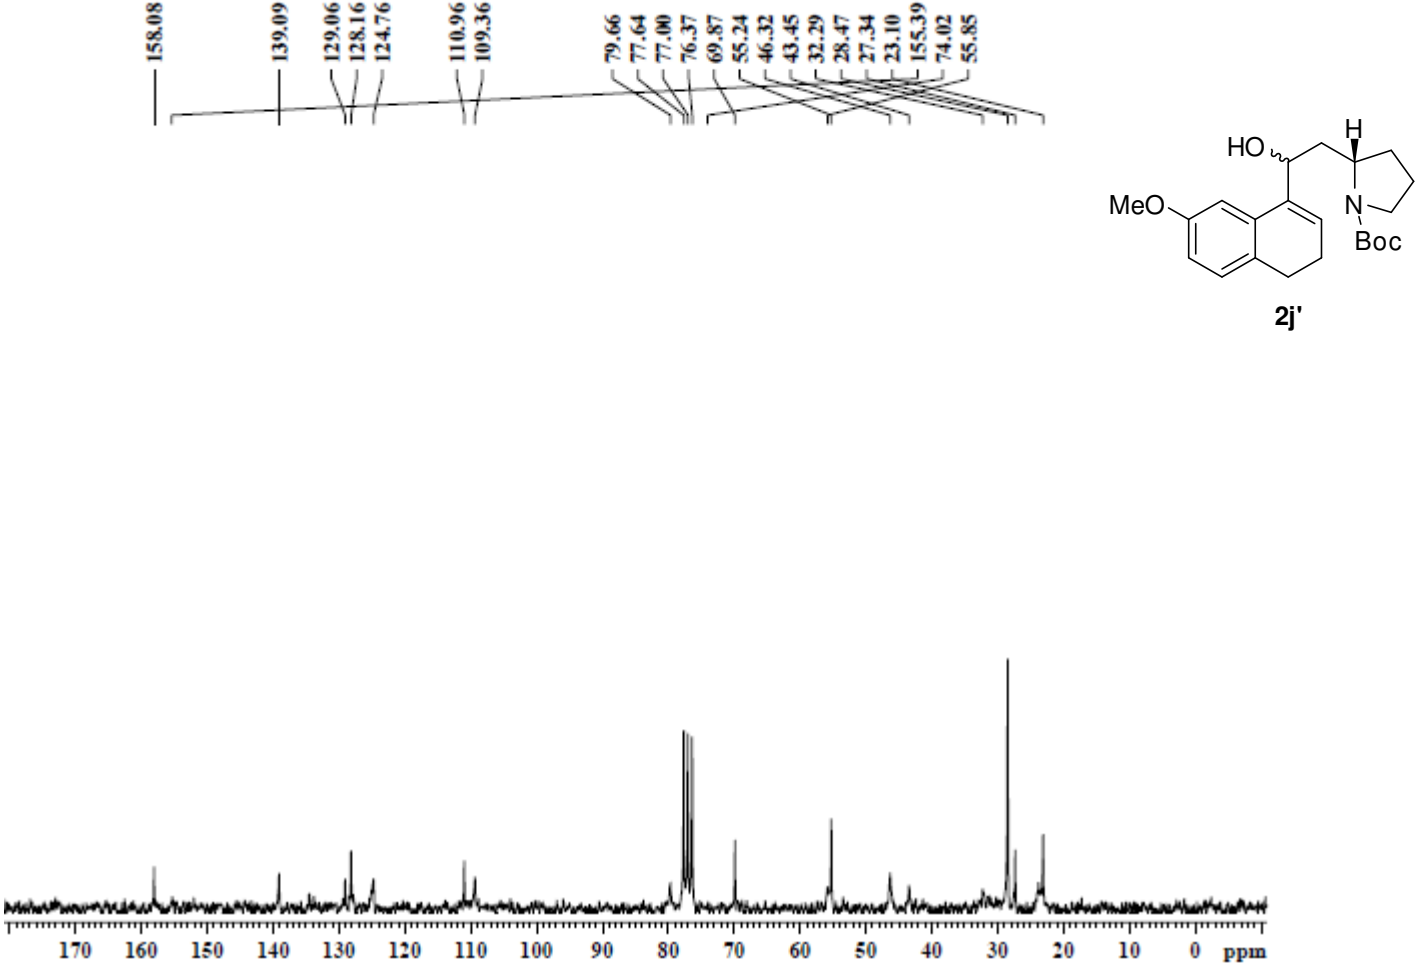

Fig.69  $^{13}\text{C}$  spectra of compound **2j'**

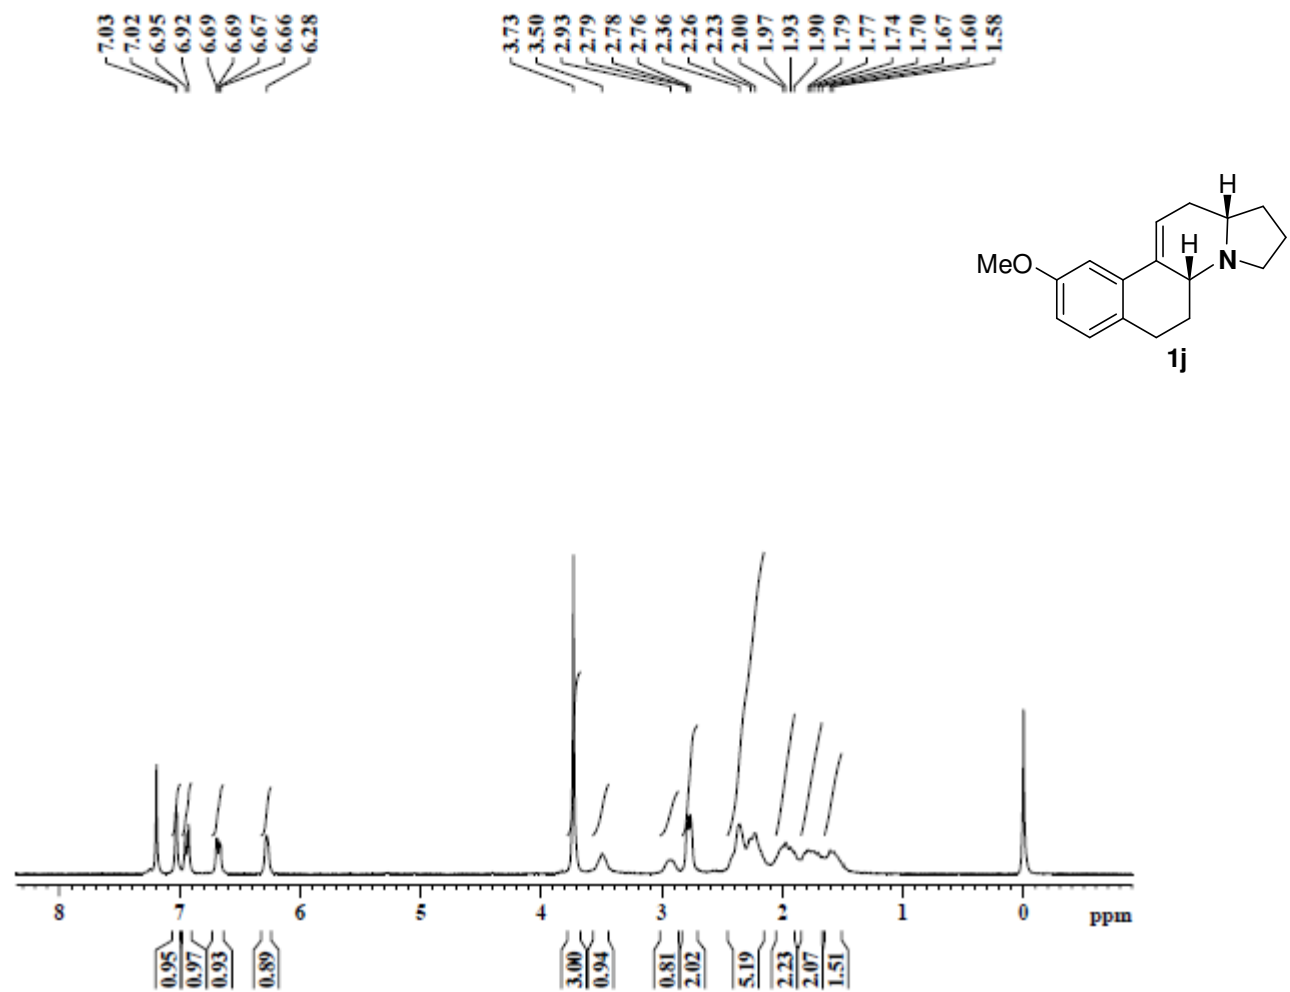

Fig.70 <sup>1</sup>H spectra of compound **1j**

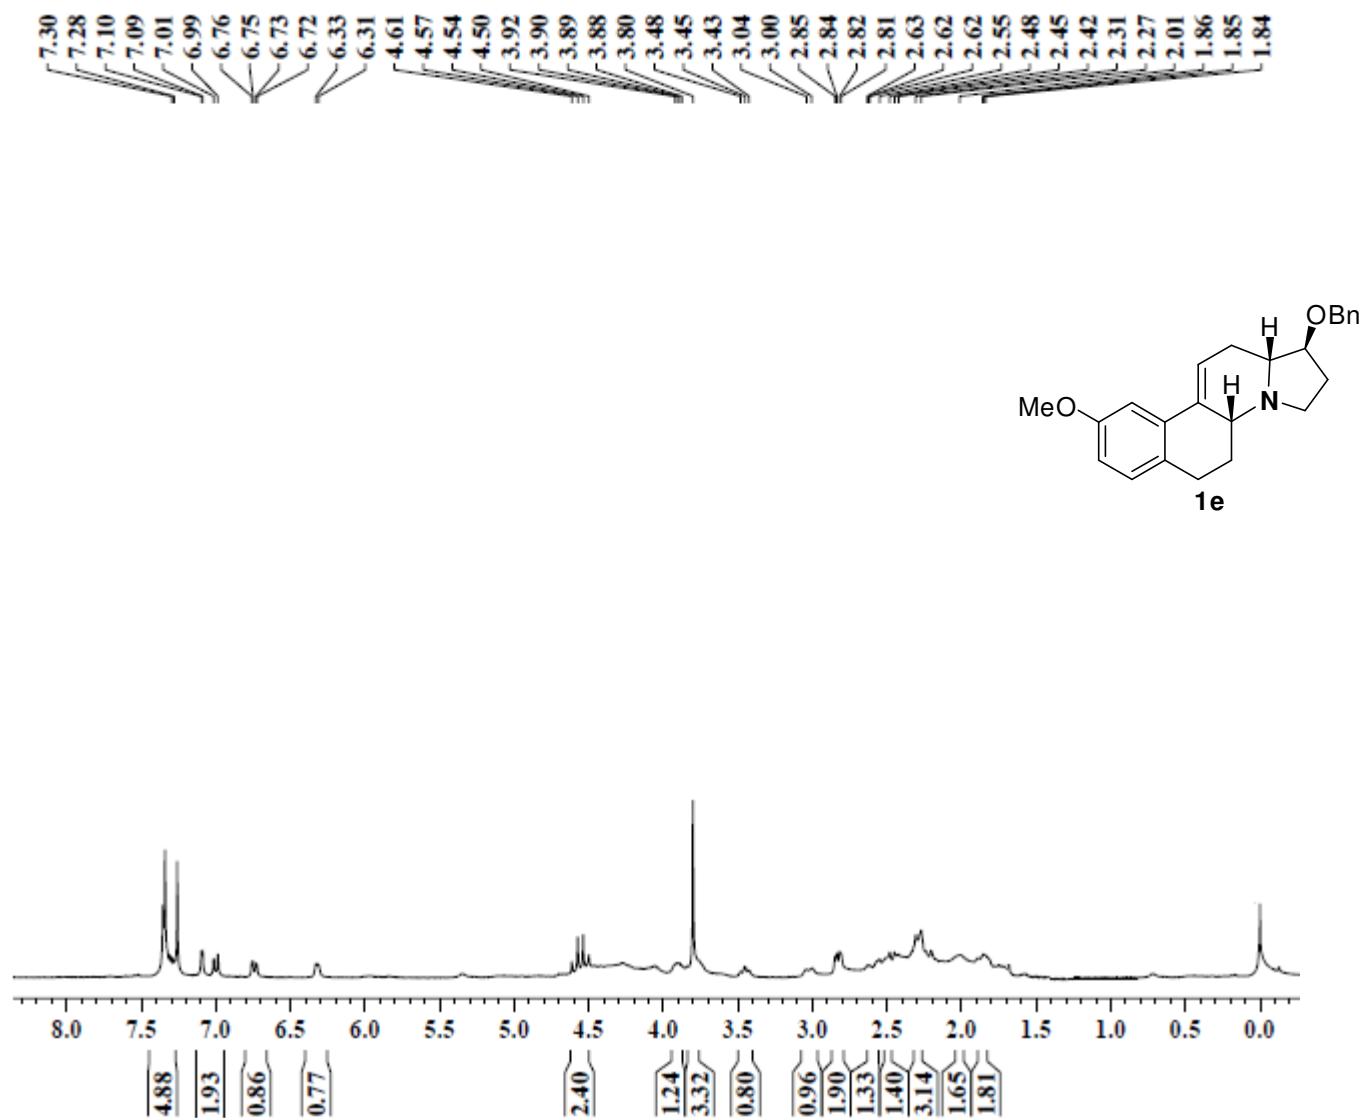

Fig.71 <sup>1</sup>H spectra of compound **1e**

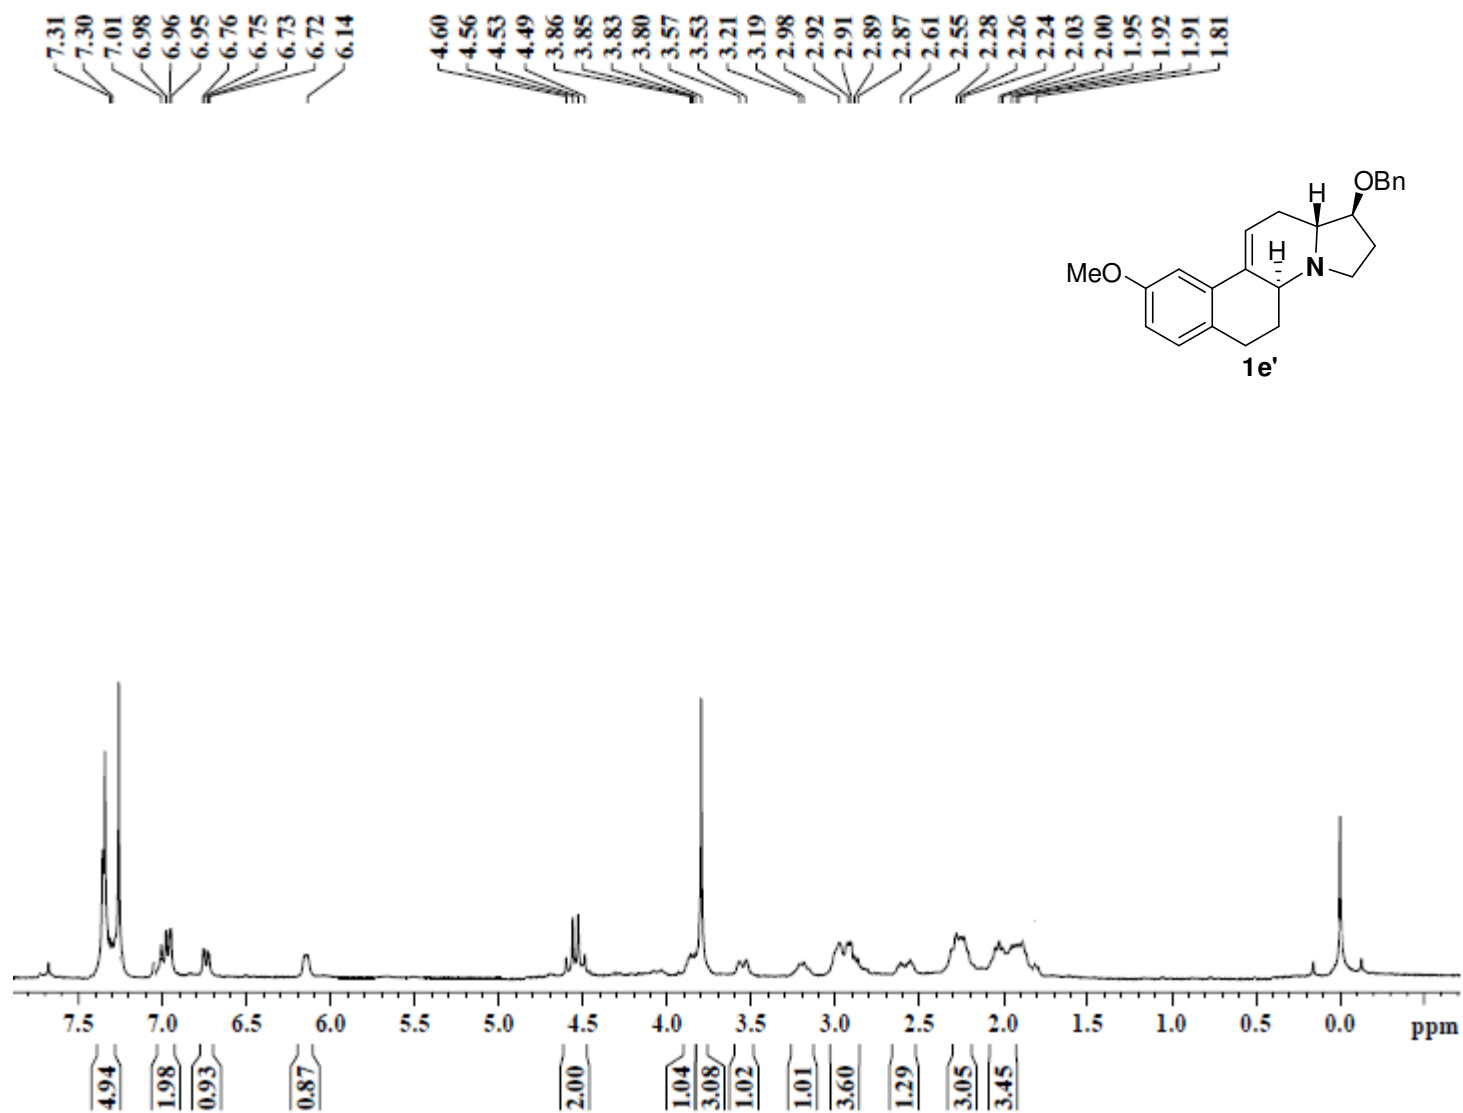

Fig.72 <sup>1</sup>H spectra of compound **1e'**

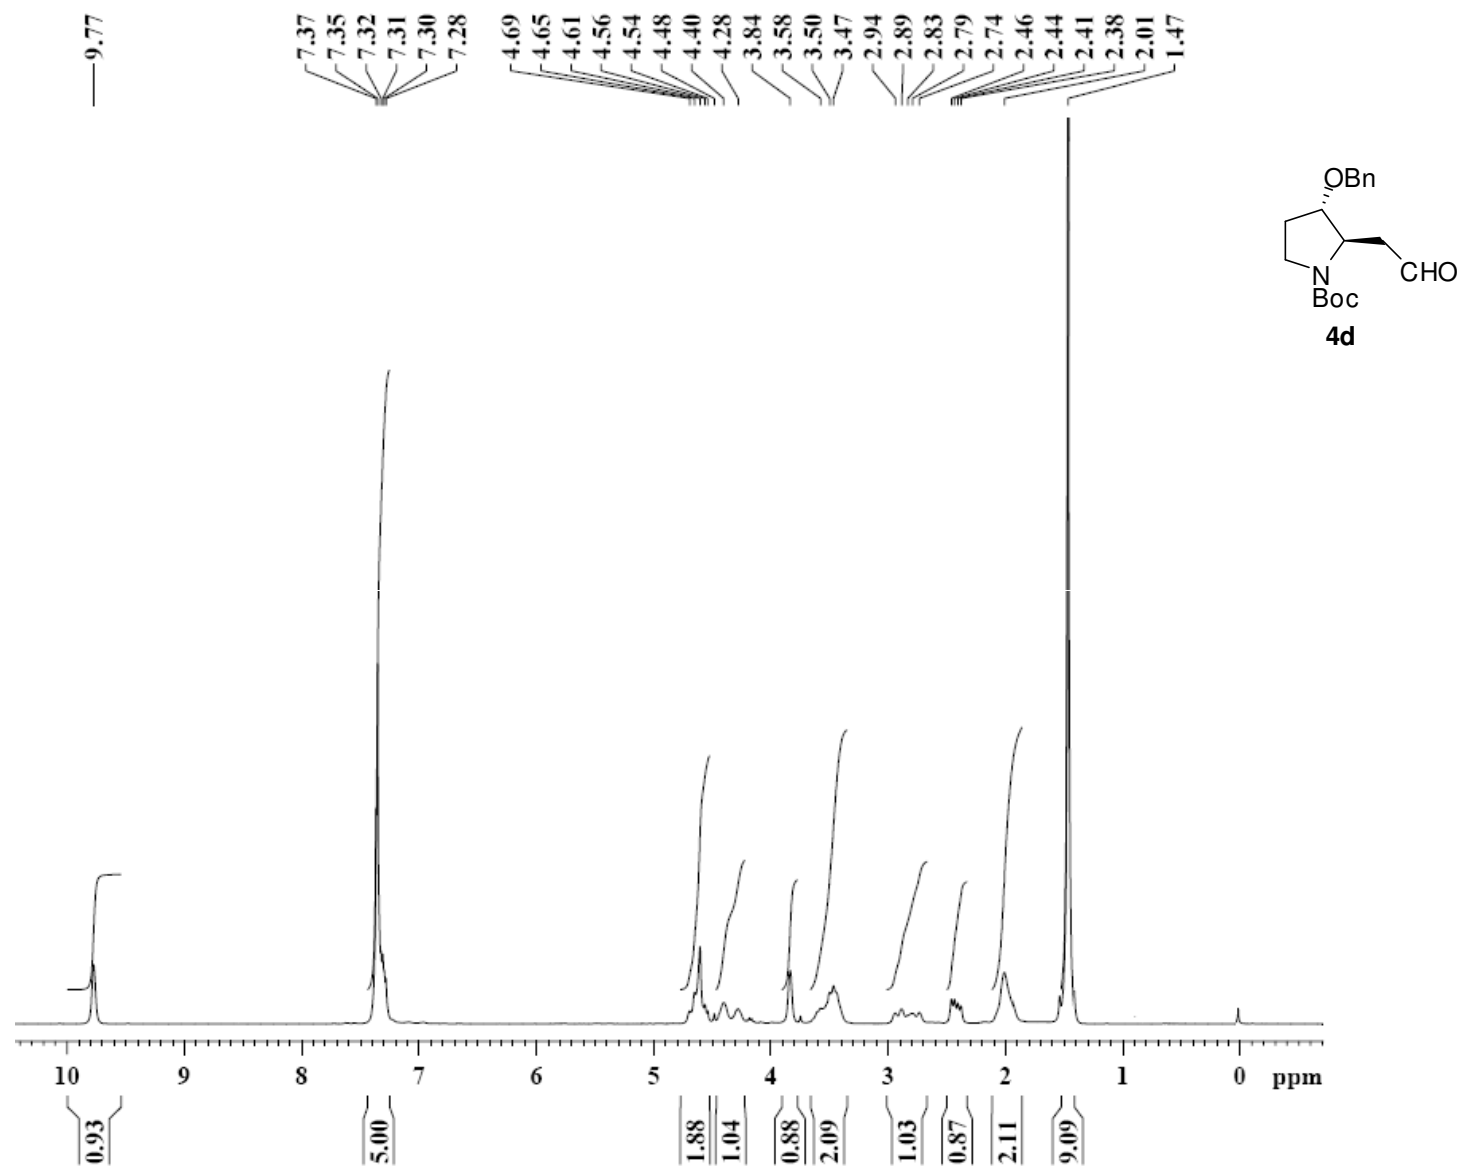

Fig.73 <sup>1</sup>H spectra of compound **4d**

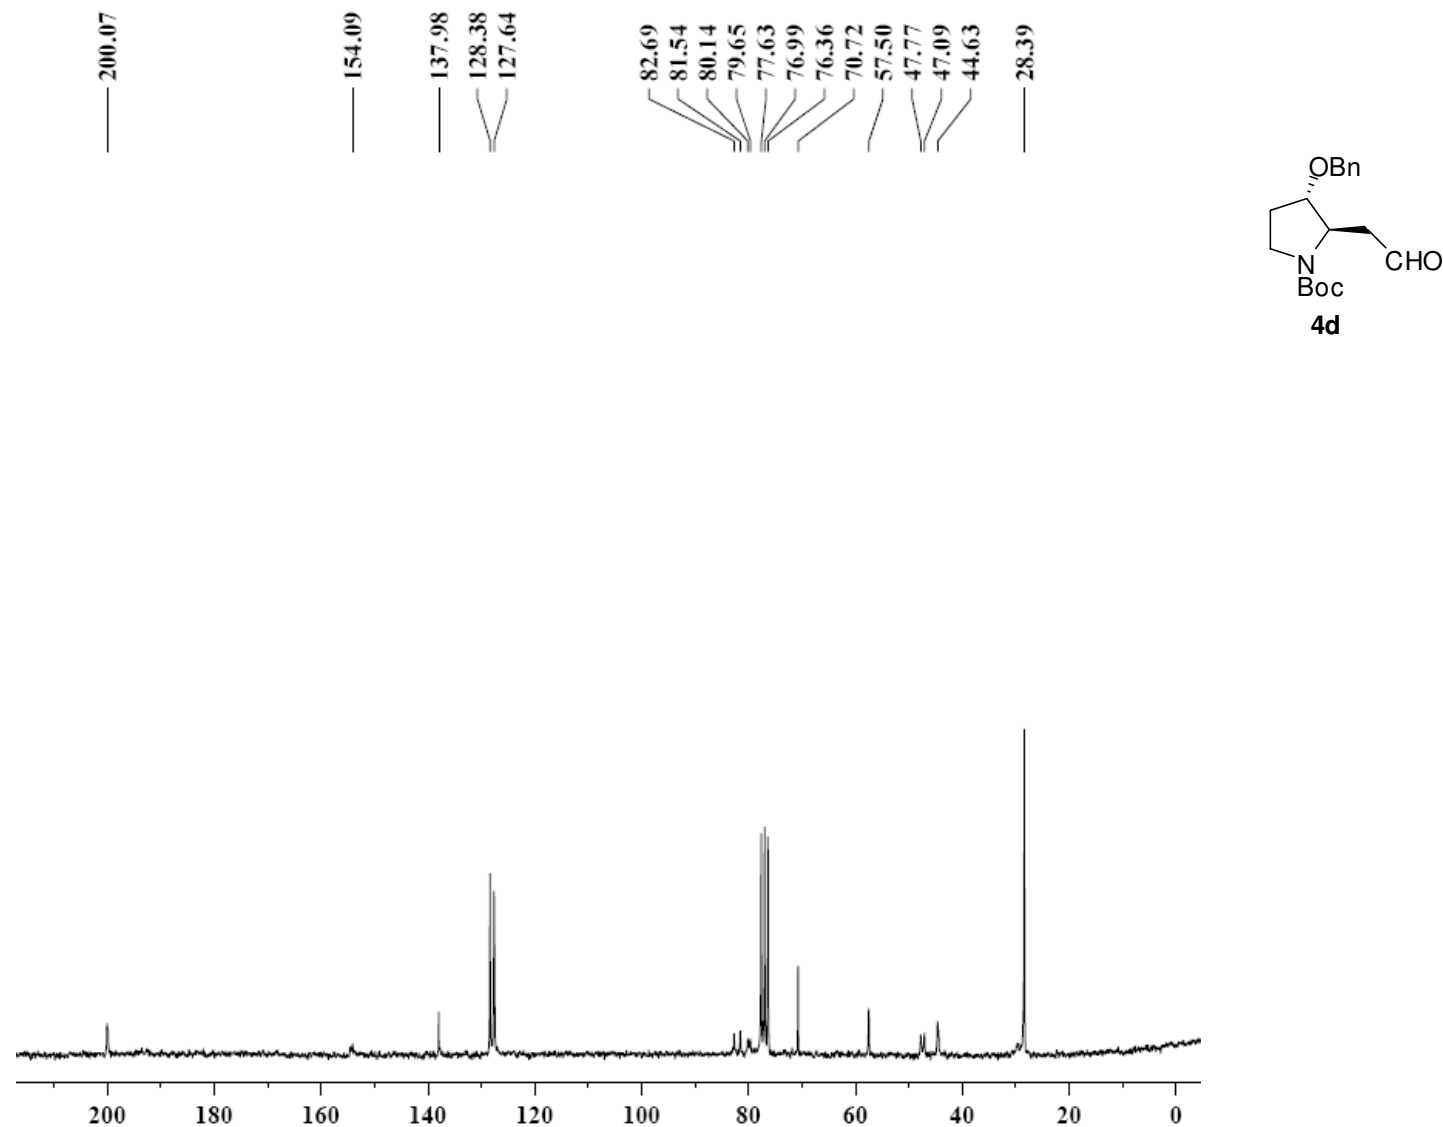

Fig.74  $^{13}\text{C}$  spectra of compound **4d**

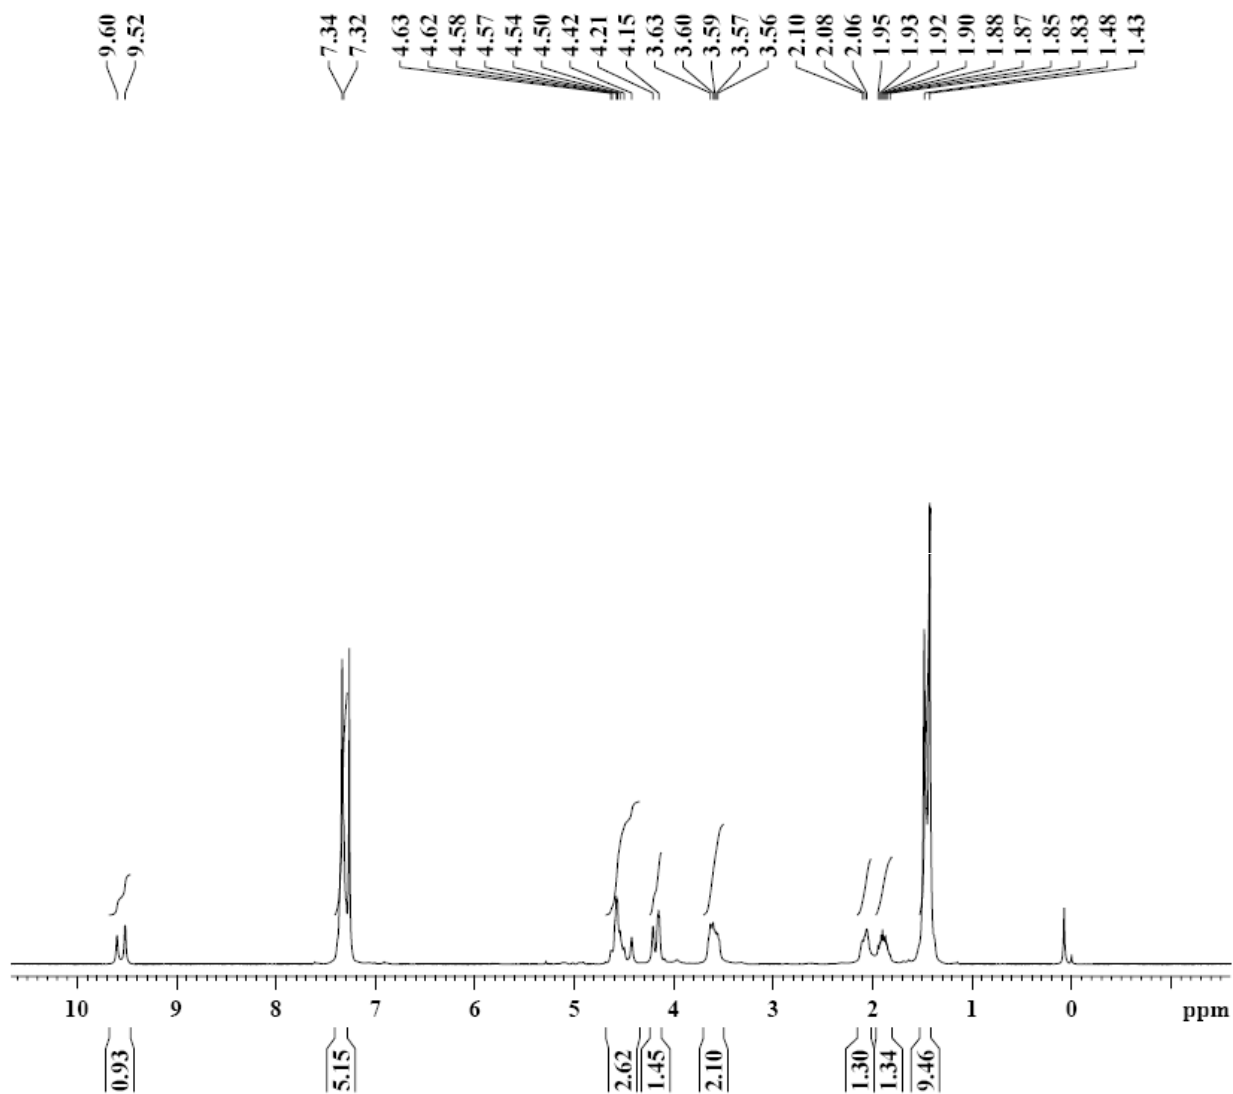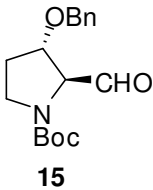

Fig.75 <sup>1</sup>H spectra of compound **15**

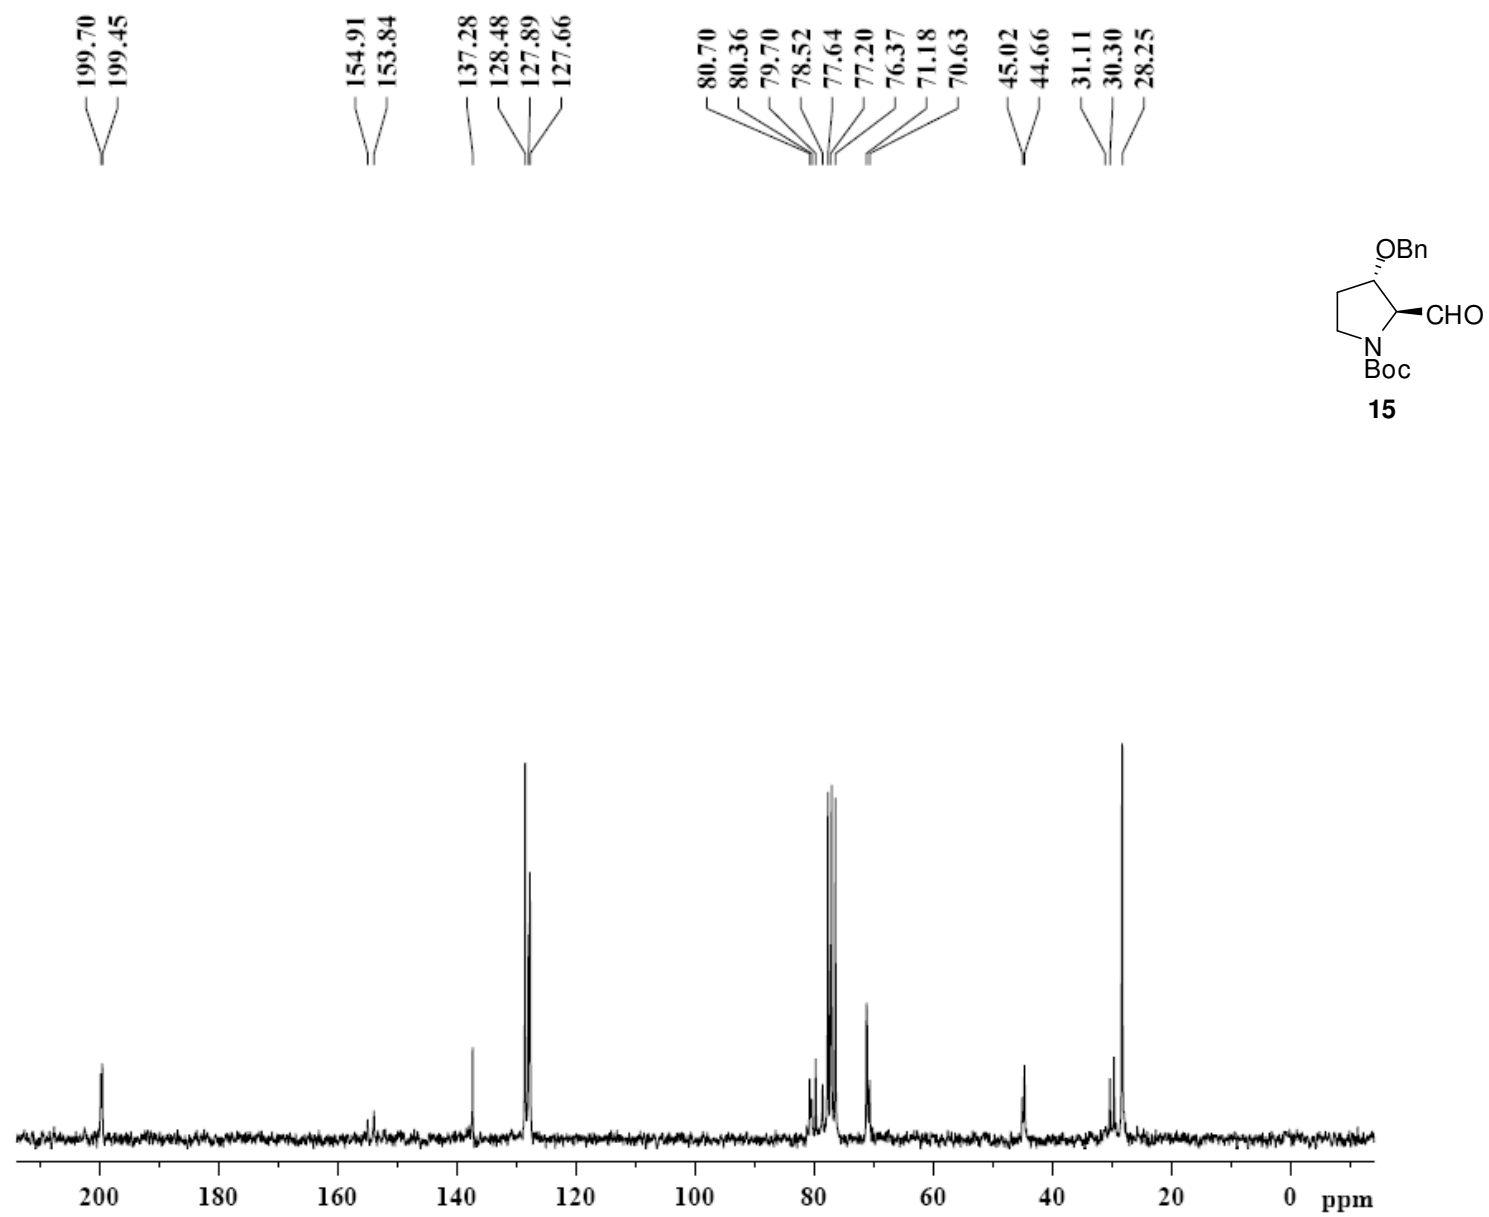

Fig.76 <sup>13</sup>C spectra of compound **15**

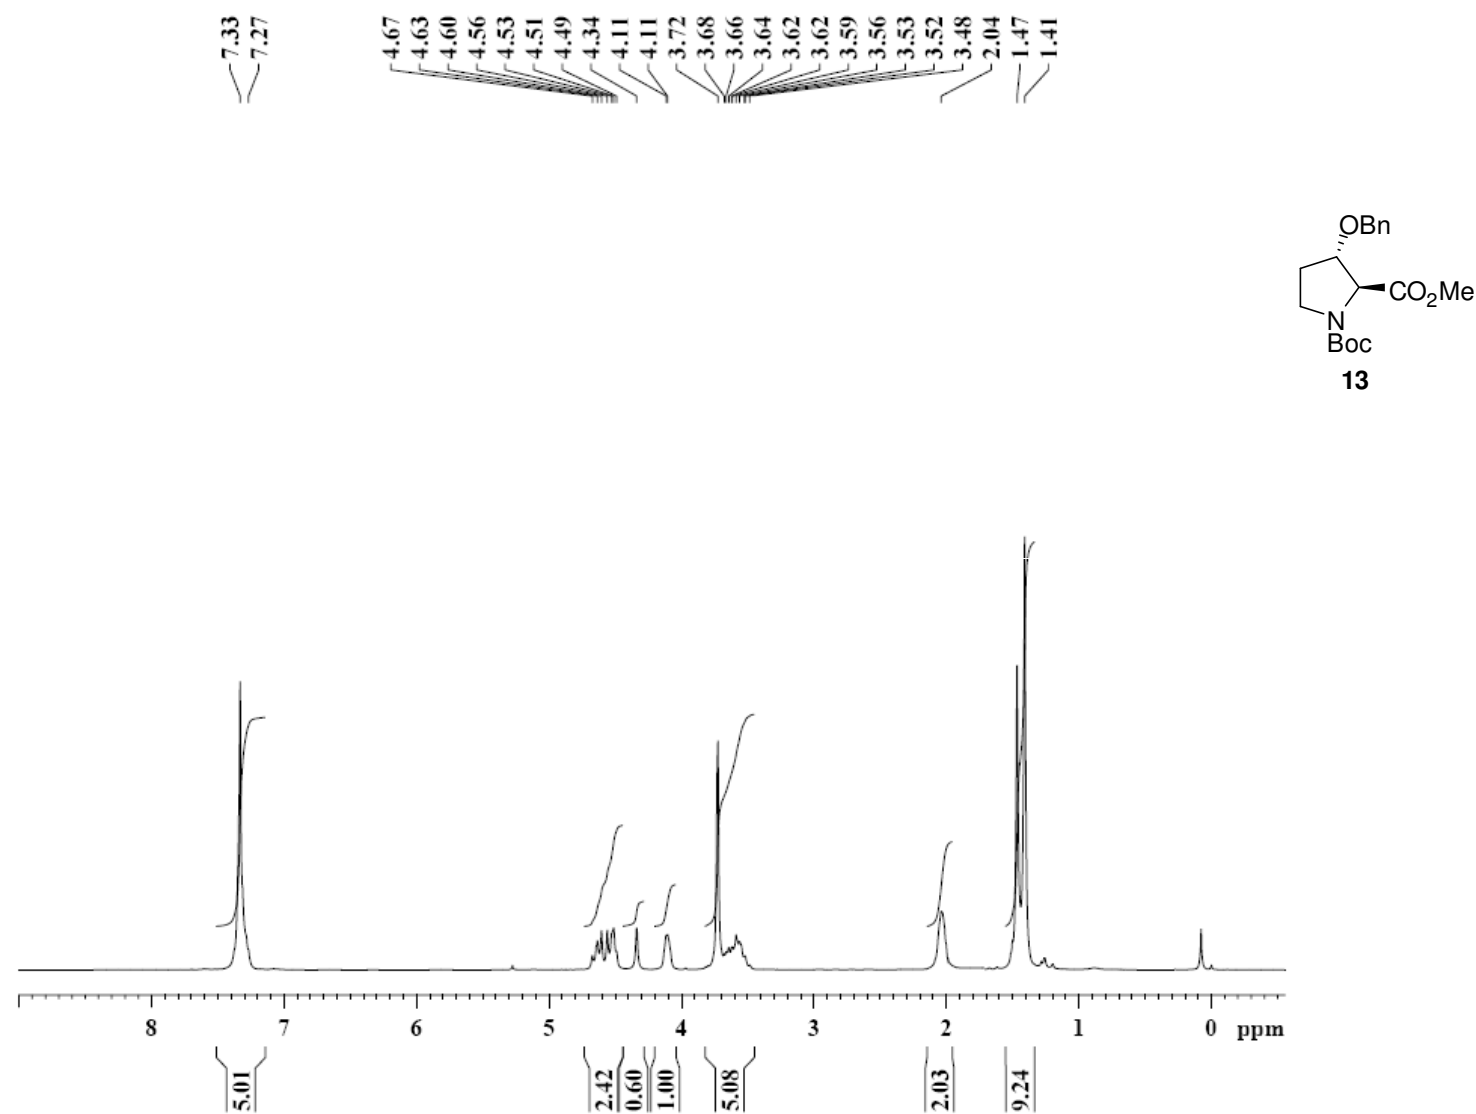

Fig.77 <sup>1</sup>H spectra of compound **13**

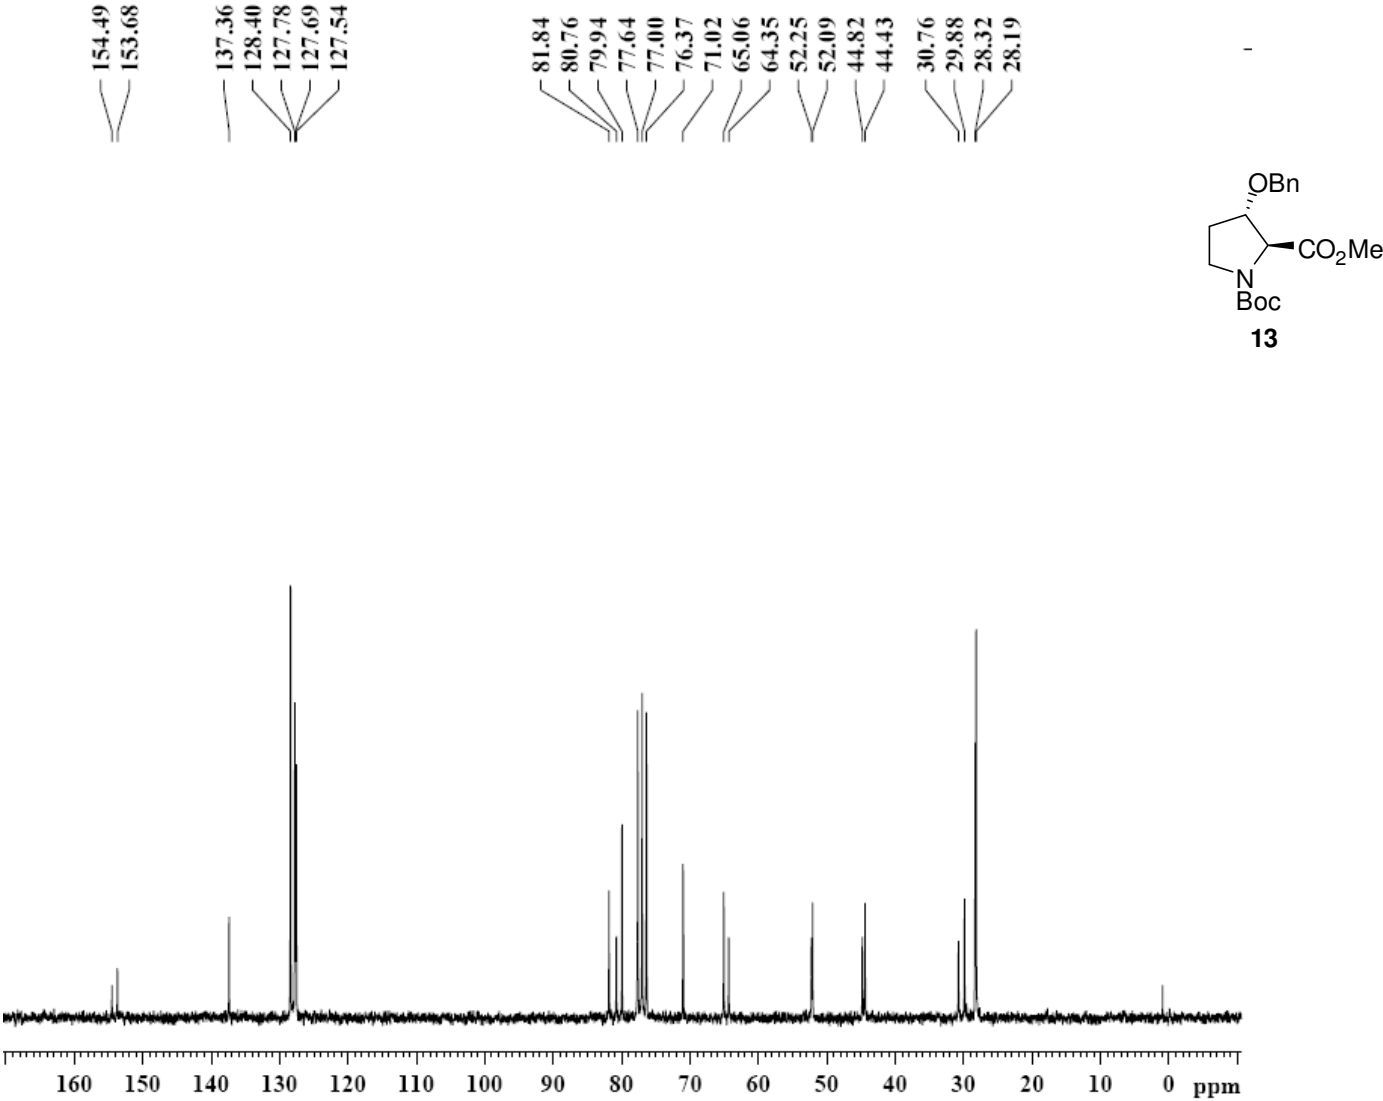

Fig.78  $^{13}\text{C}$  spectra of compound **13**

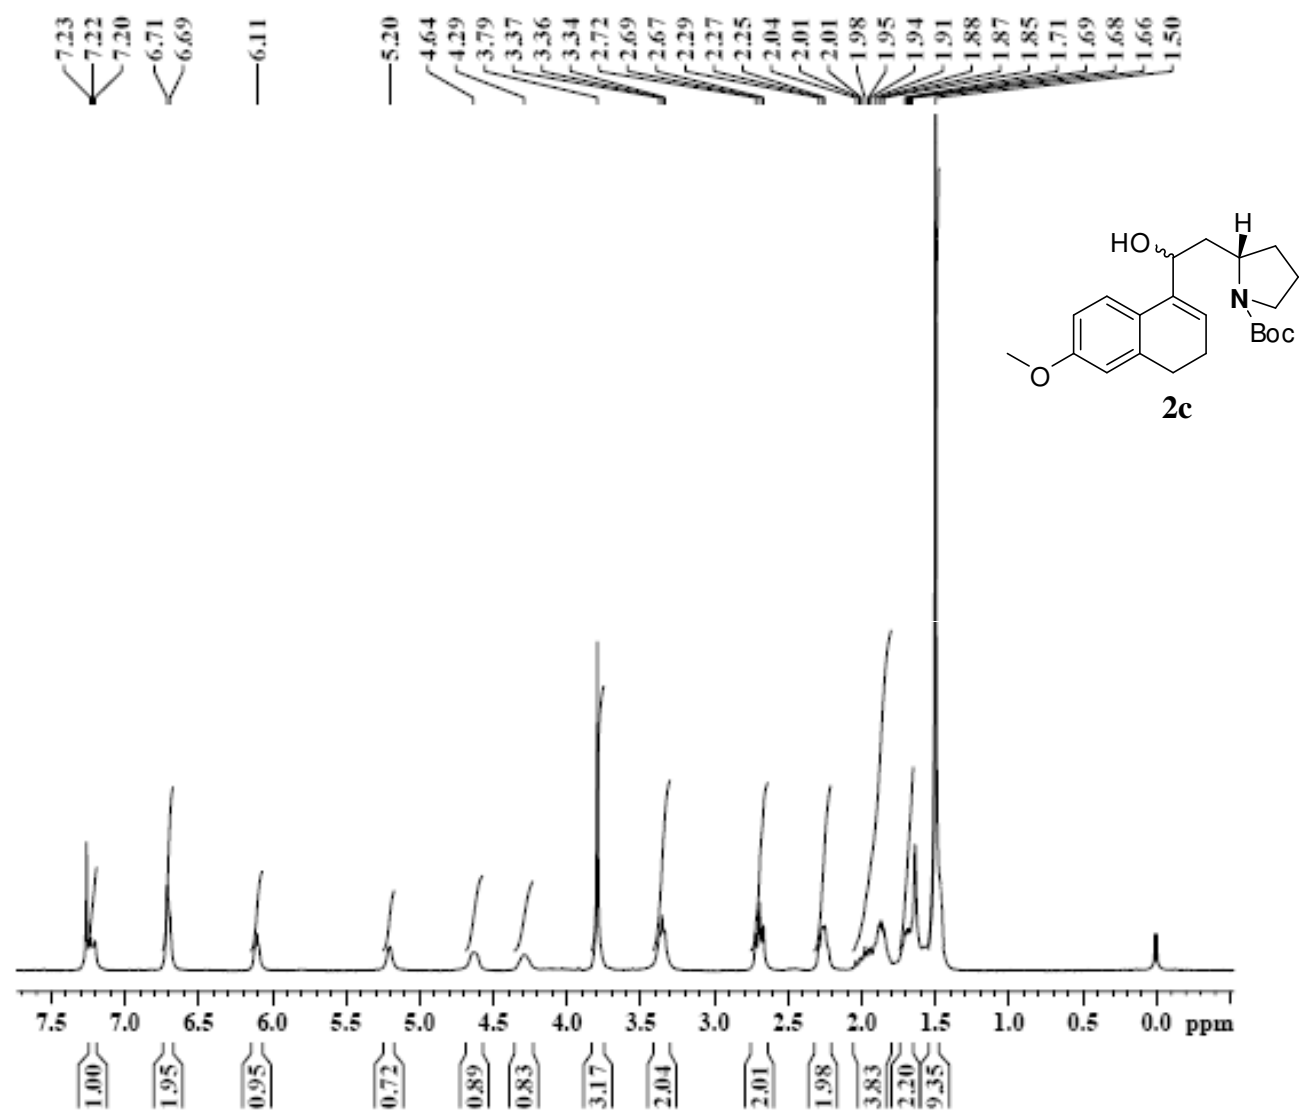

Fig.79  $^1\text{H}$  spectra of compound **2c**

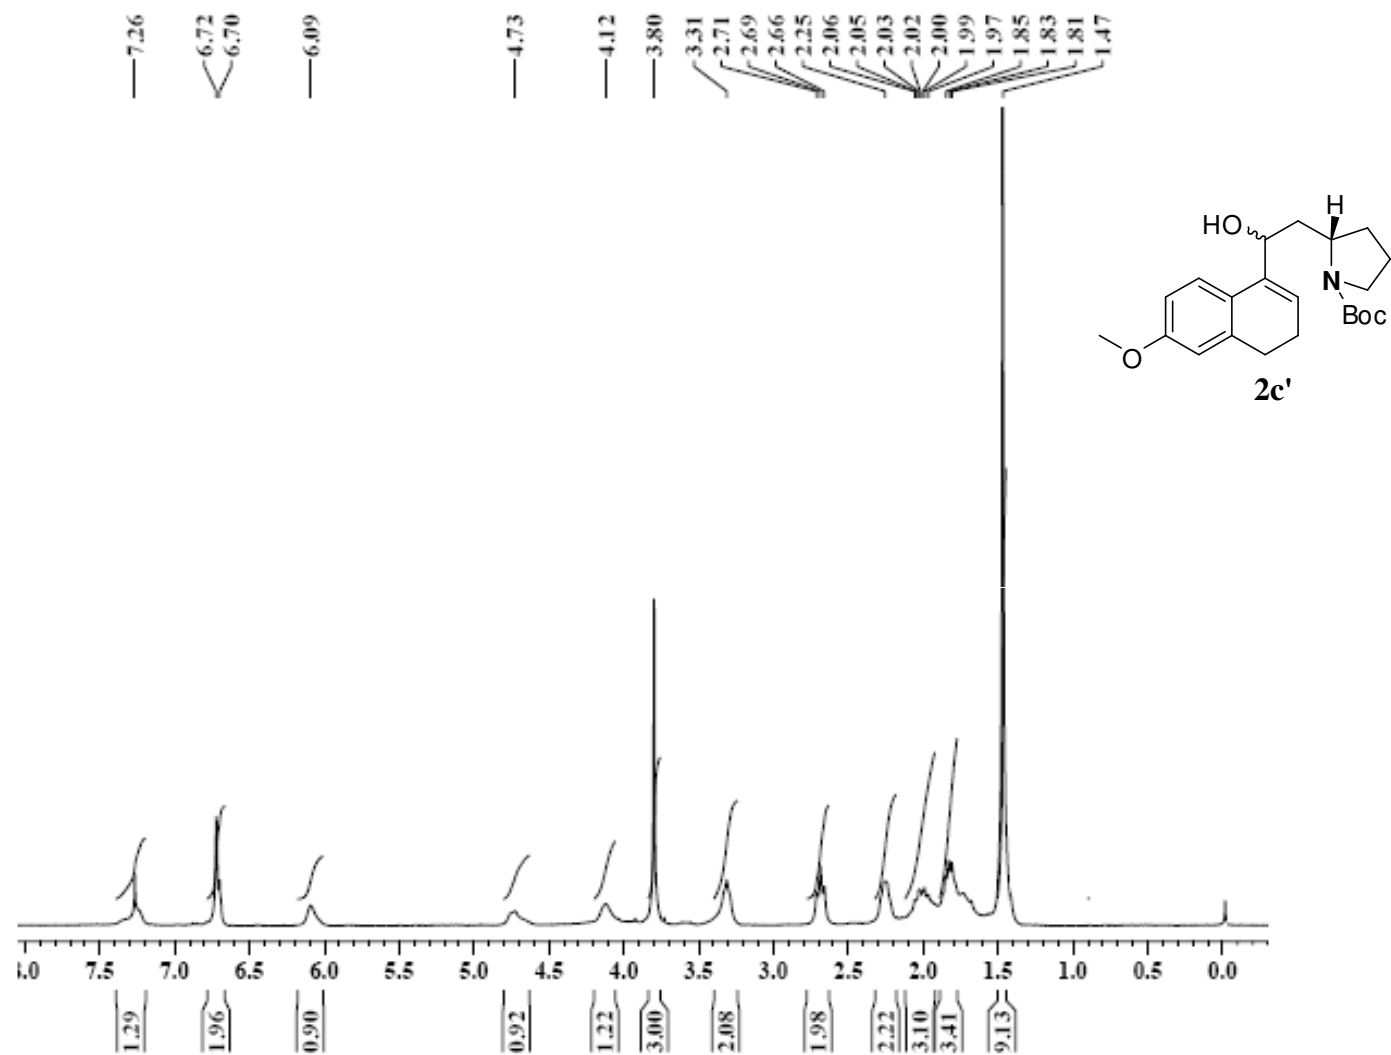

Fig.80  $^1\text{H}$  spectra of compound **2c'**

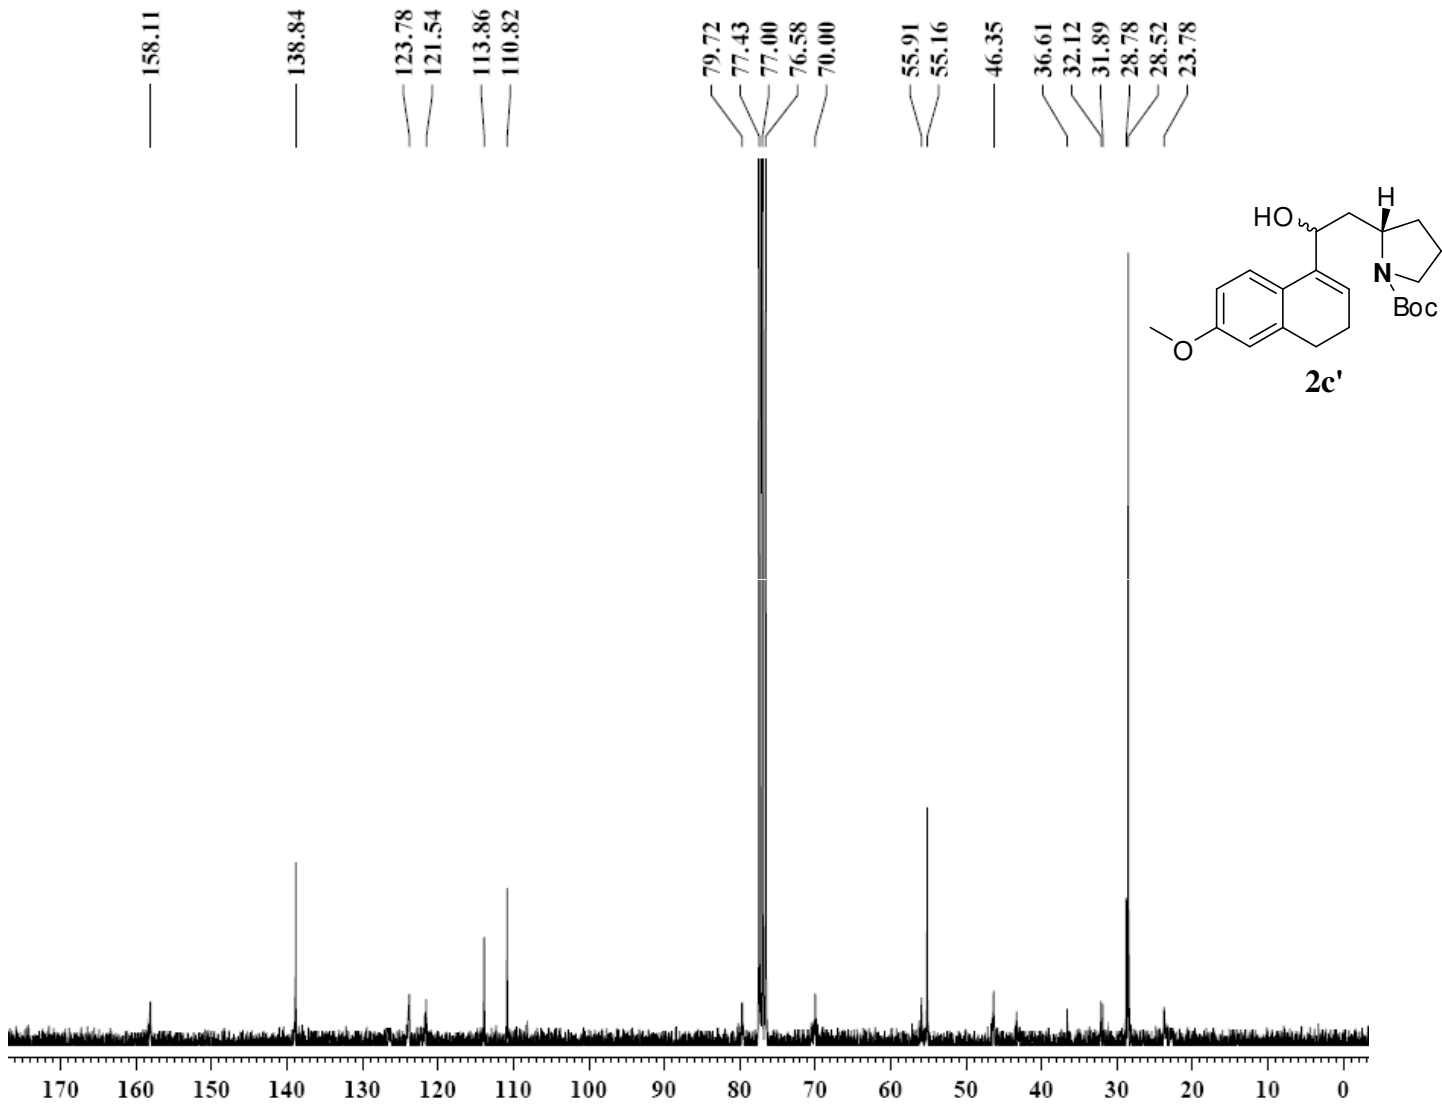

Fig.81  $^{13}\text{C}$  spectra of compound **2c'**

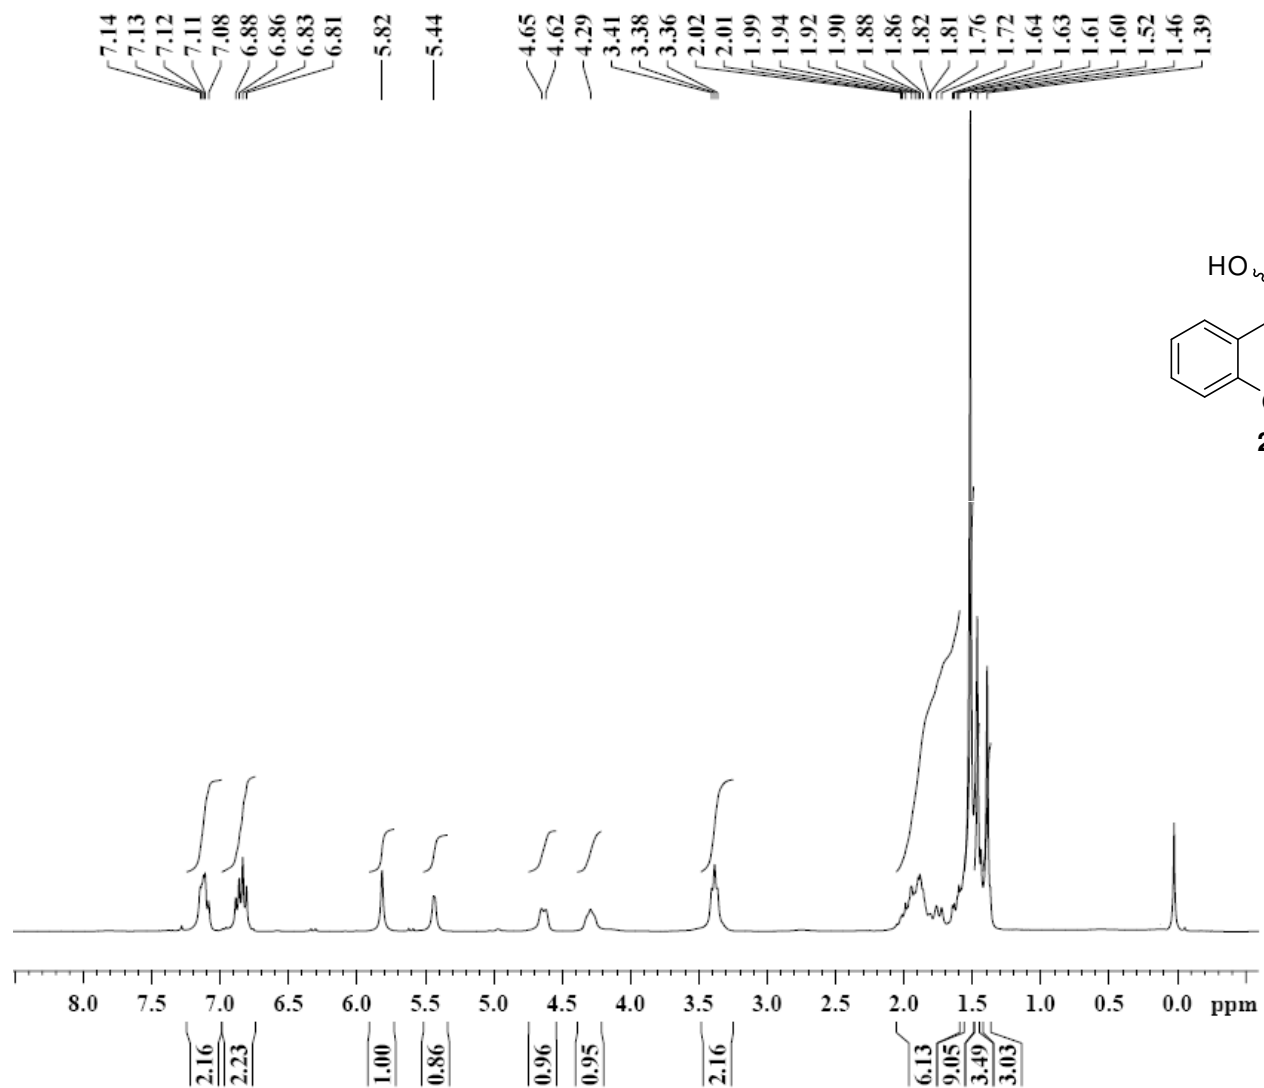

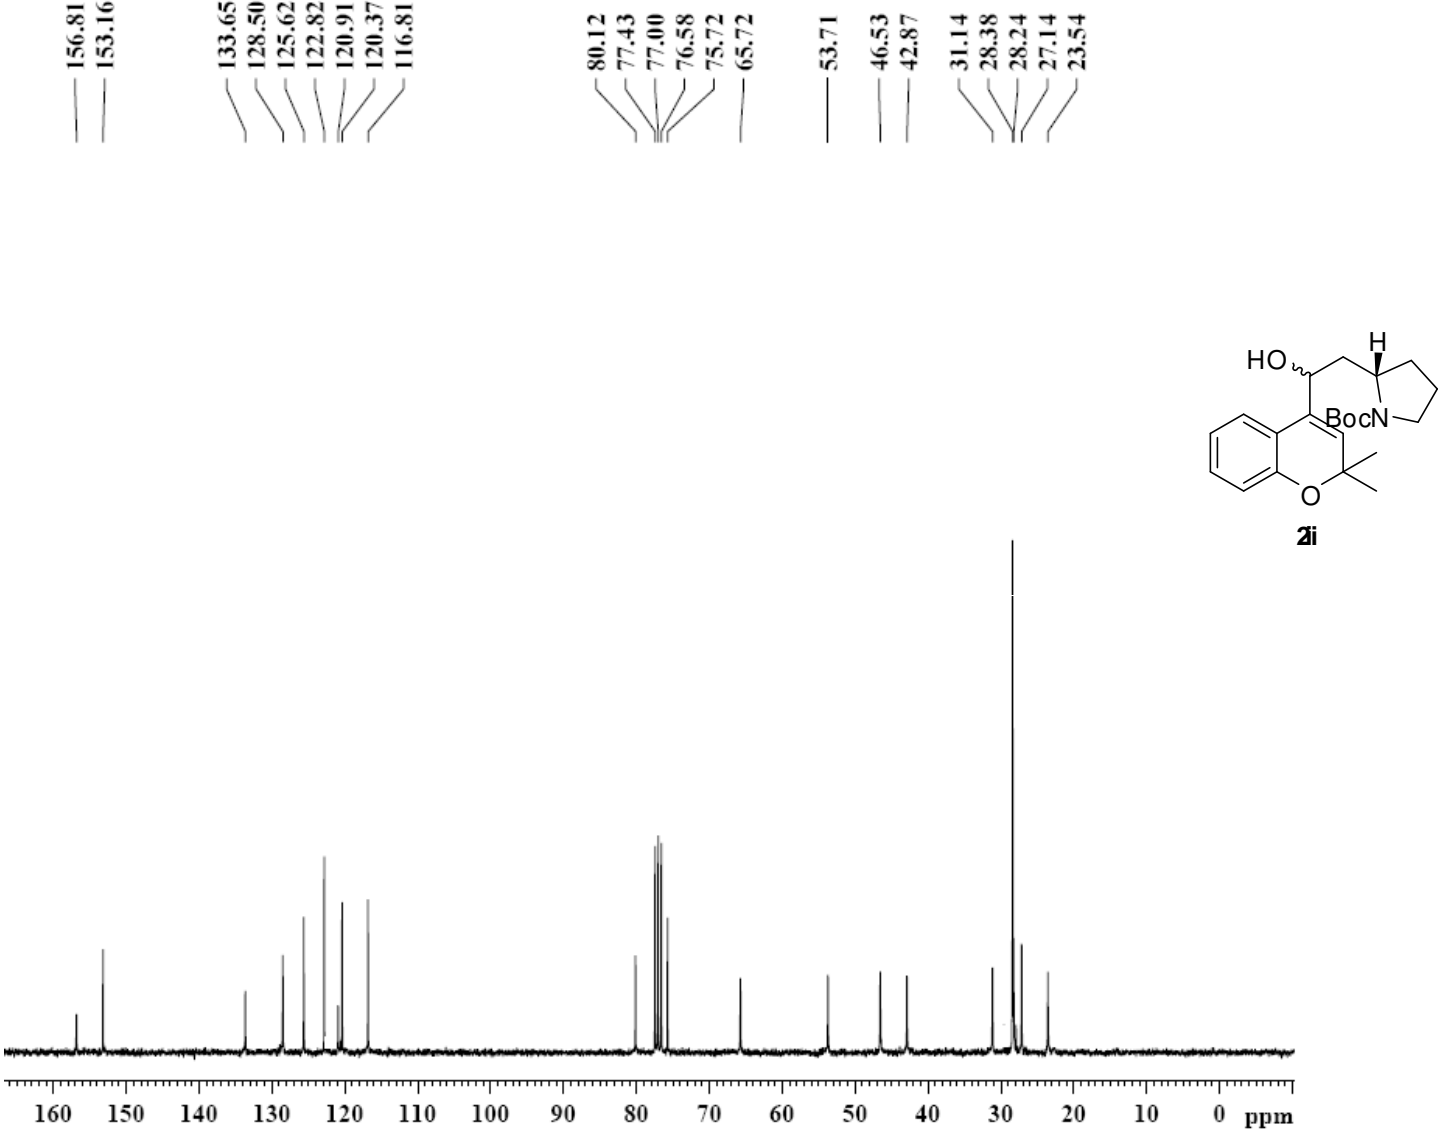

Fig.83 <sup>13</sup>C spectra of compound **2i**

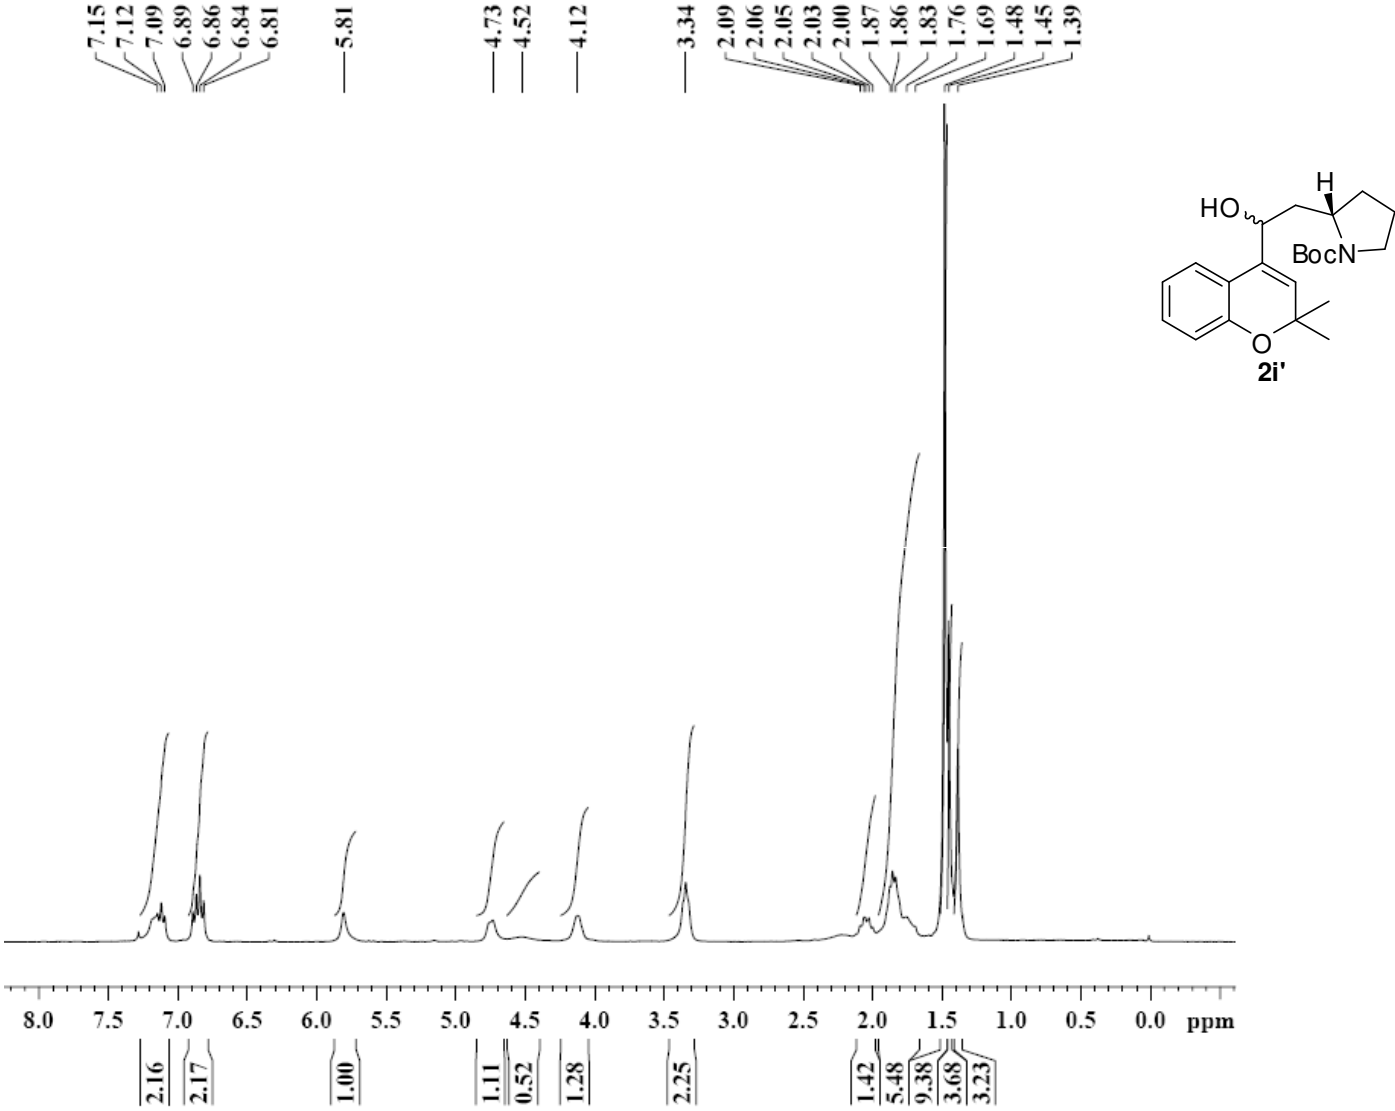

Fig.84 <sup>1</sup>H spectra of compound 2i'

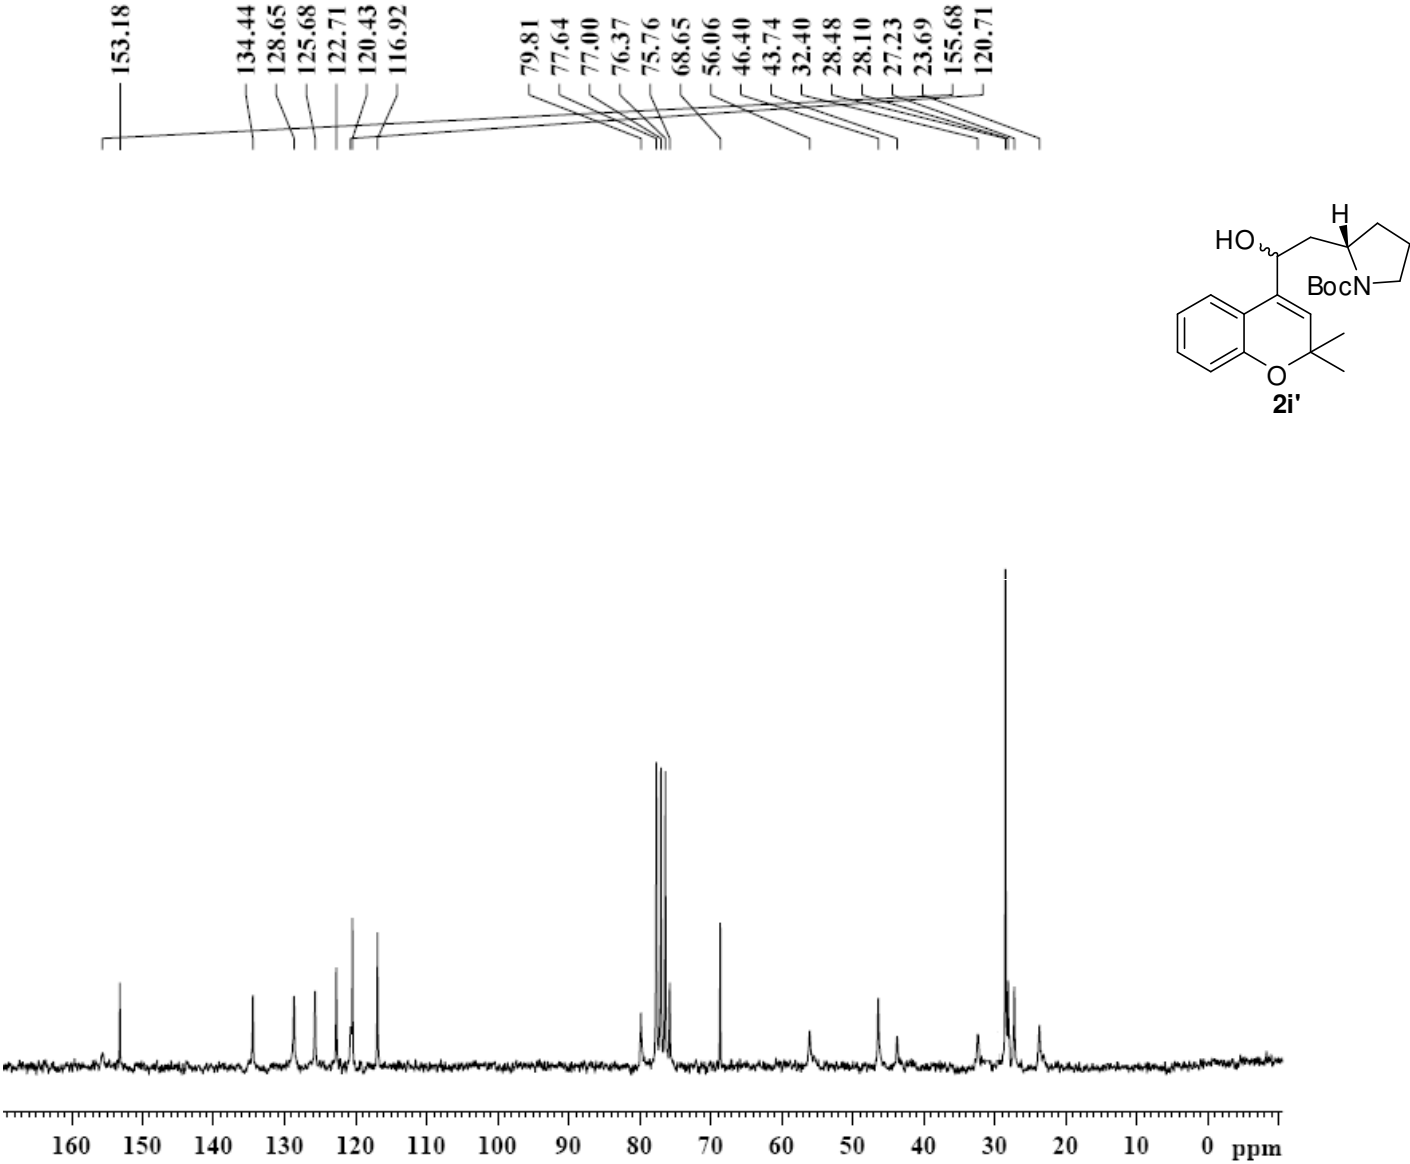

Fig.85 <sup>13</sup>C spectra of compound **2i'**

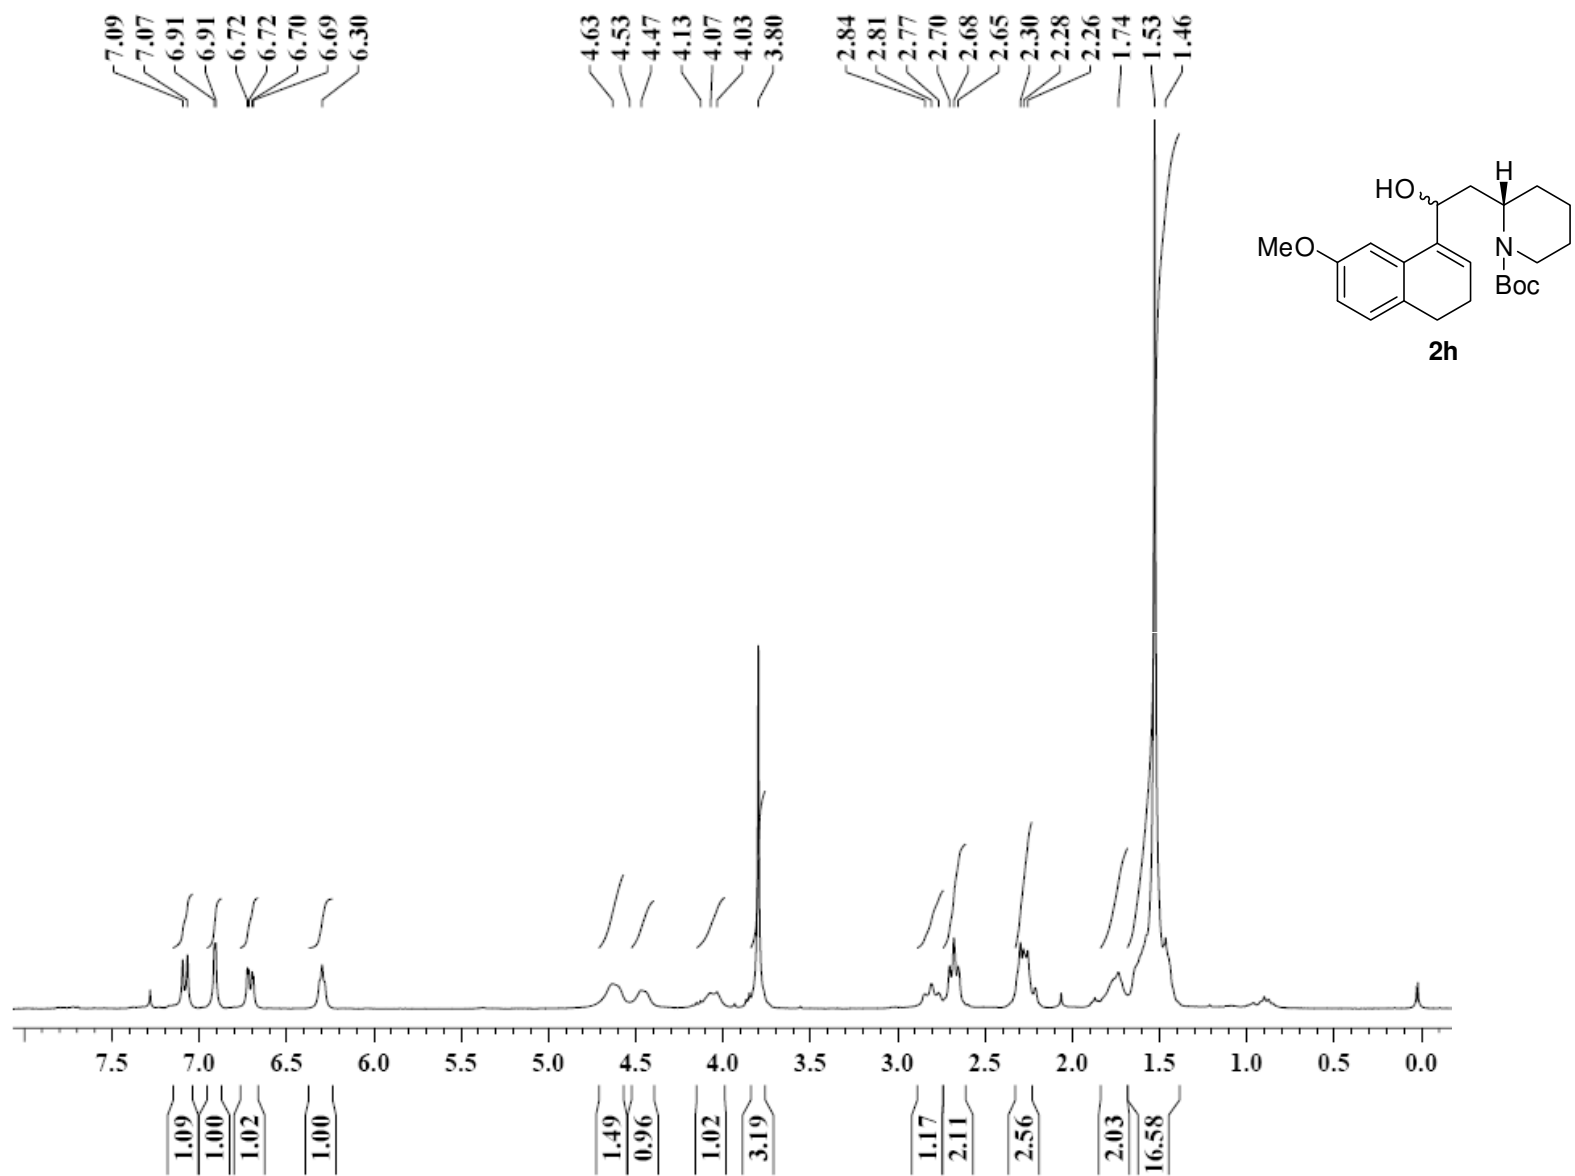

Fig.86 <sup>1</sup>H spectra of compound **2h**

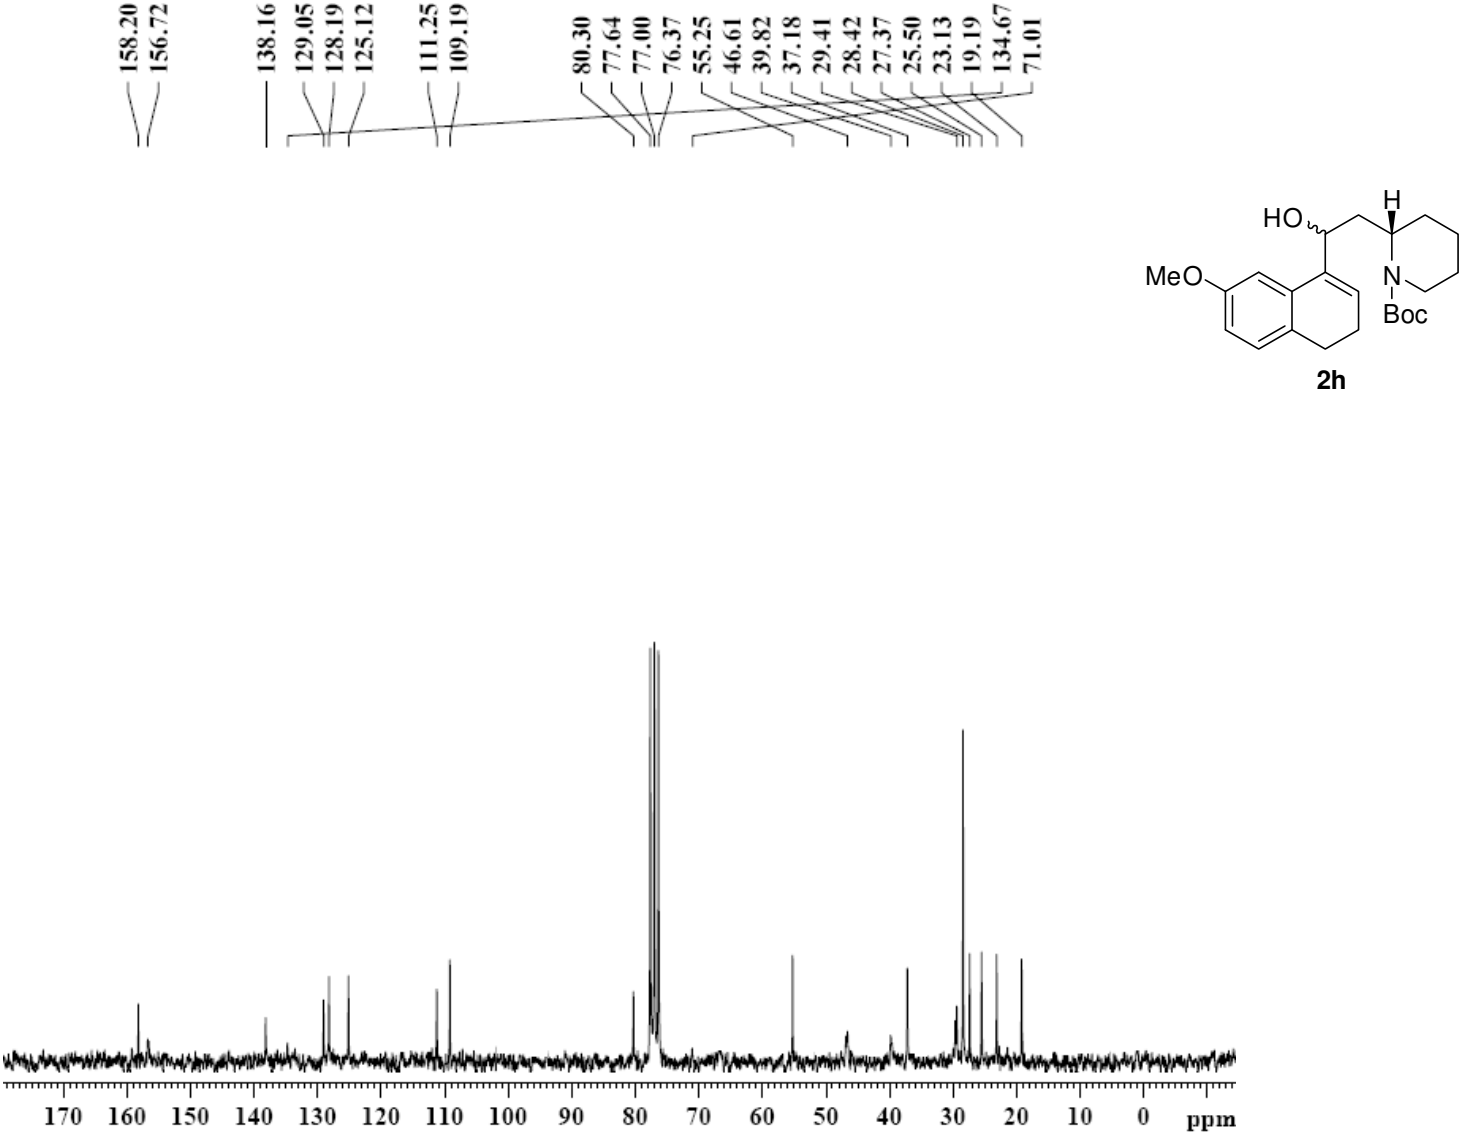

Fig.87 <sup>13</sup>C spectra of compound **2h**

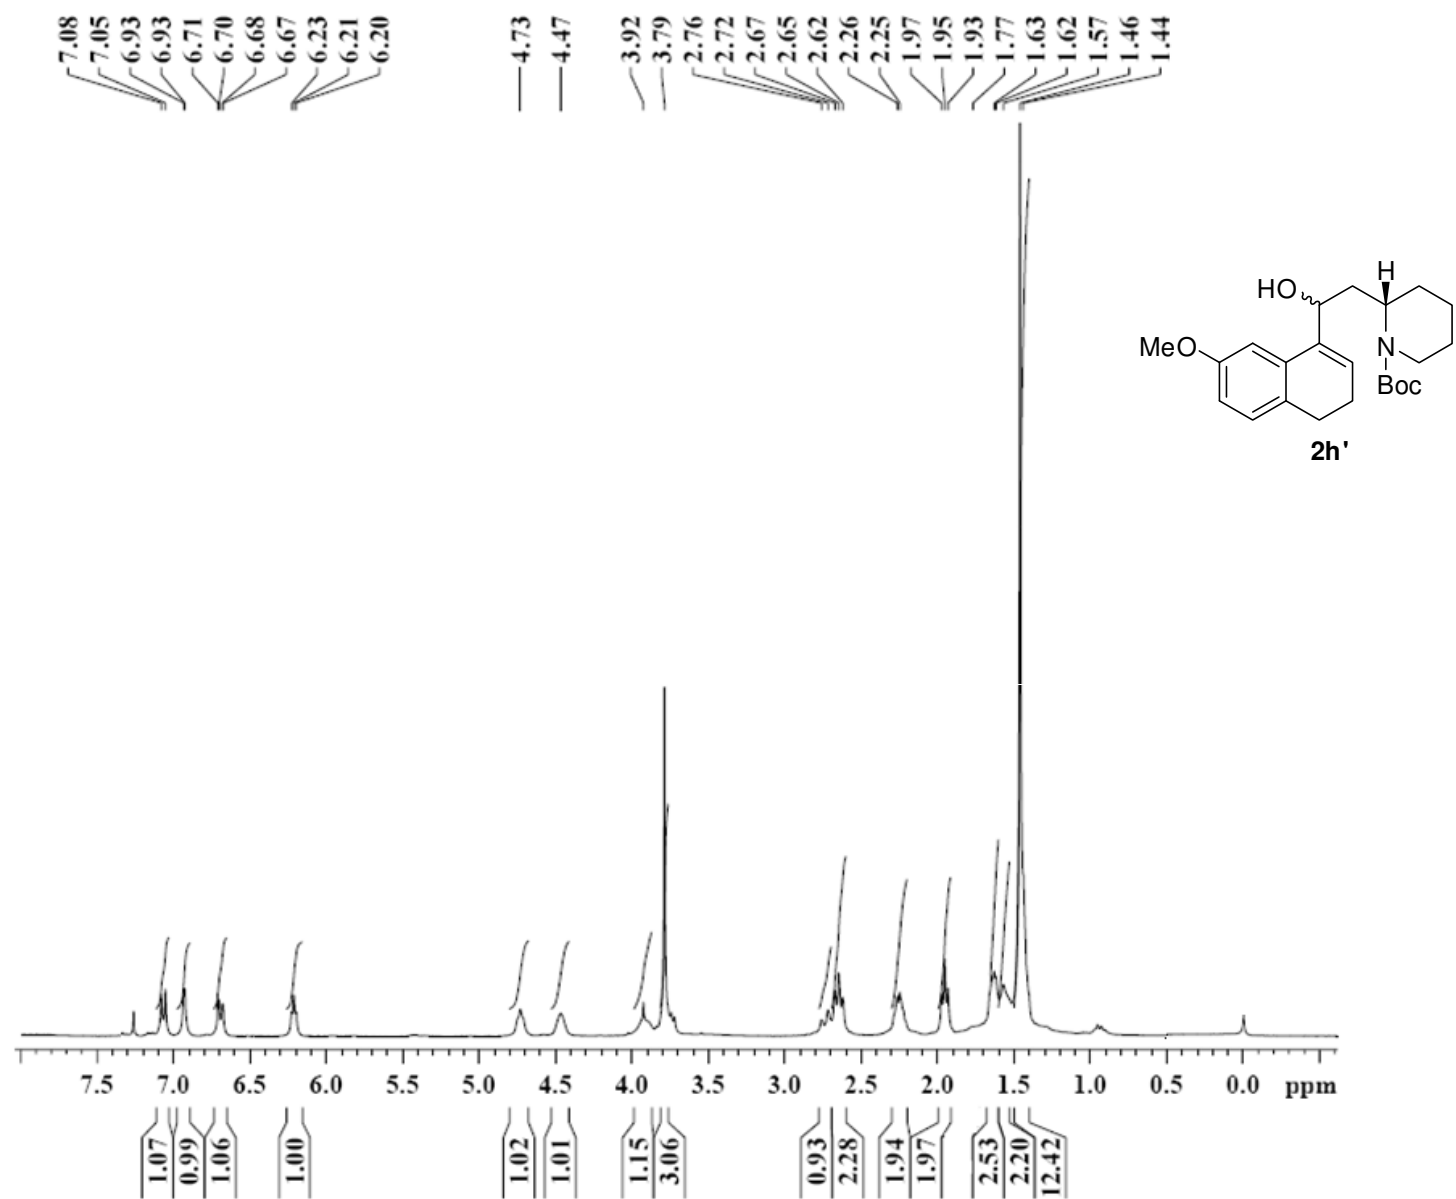

Fig.88 <sup>1</sup>H spectra of compound 2h'

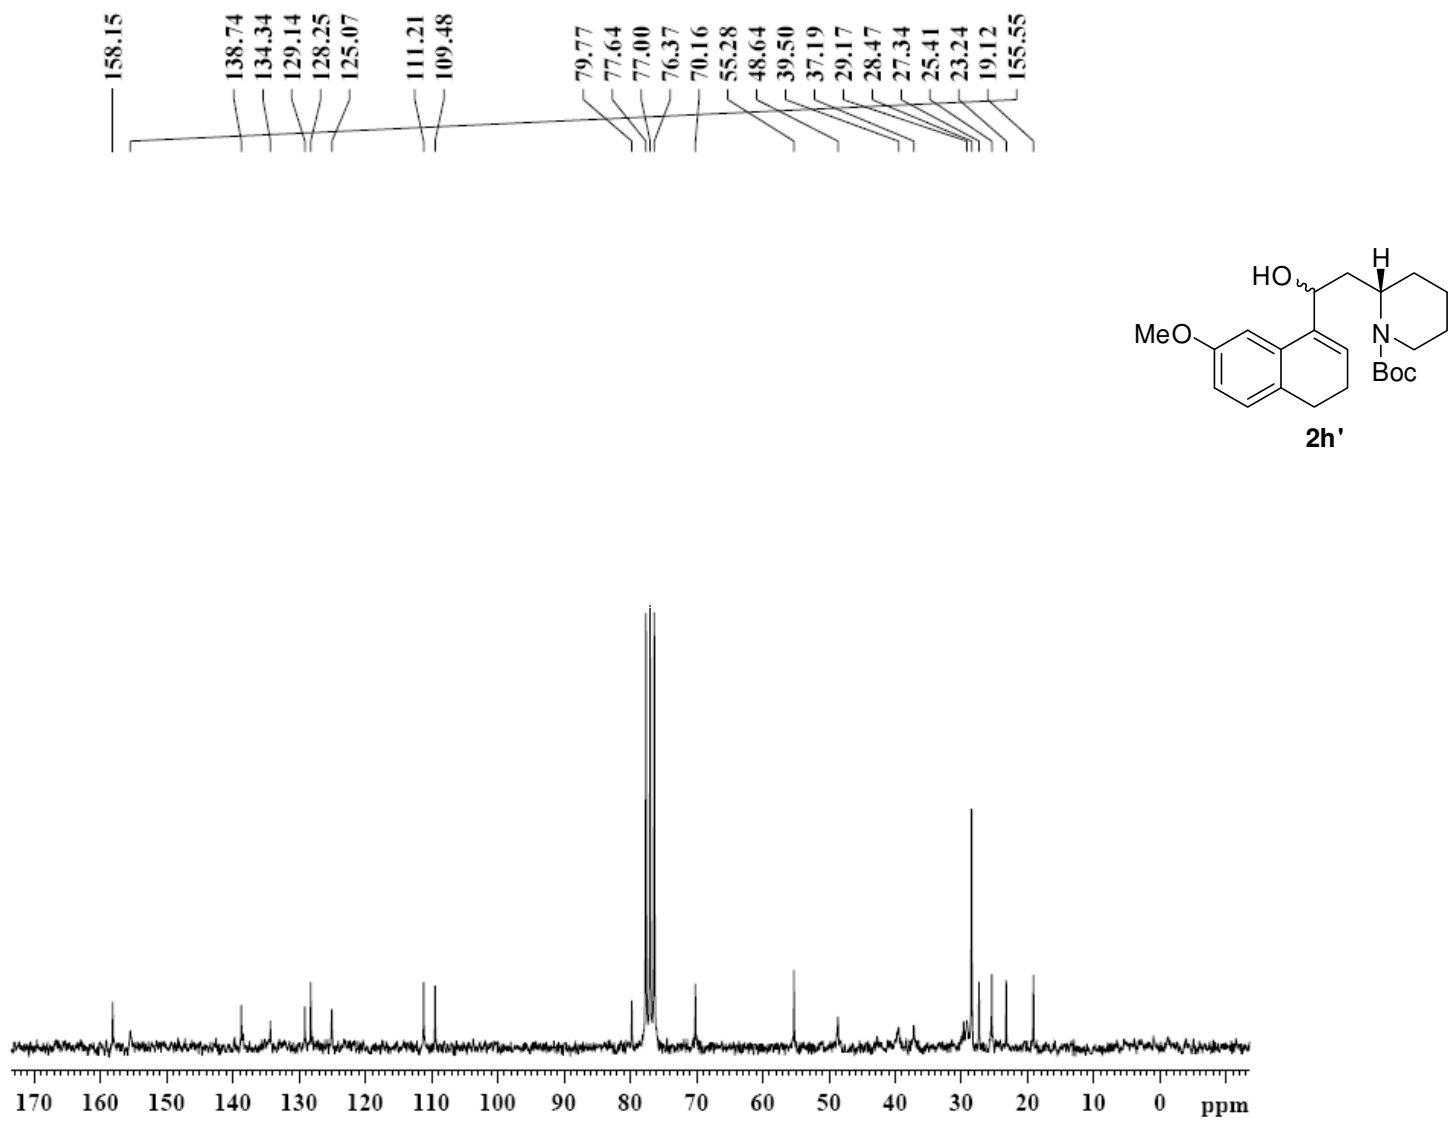

Fig.89  $^{13}\text{C}$  spectra of compound **2h'**

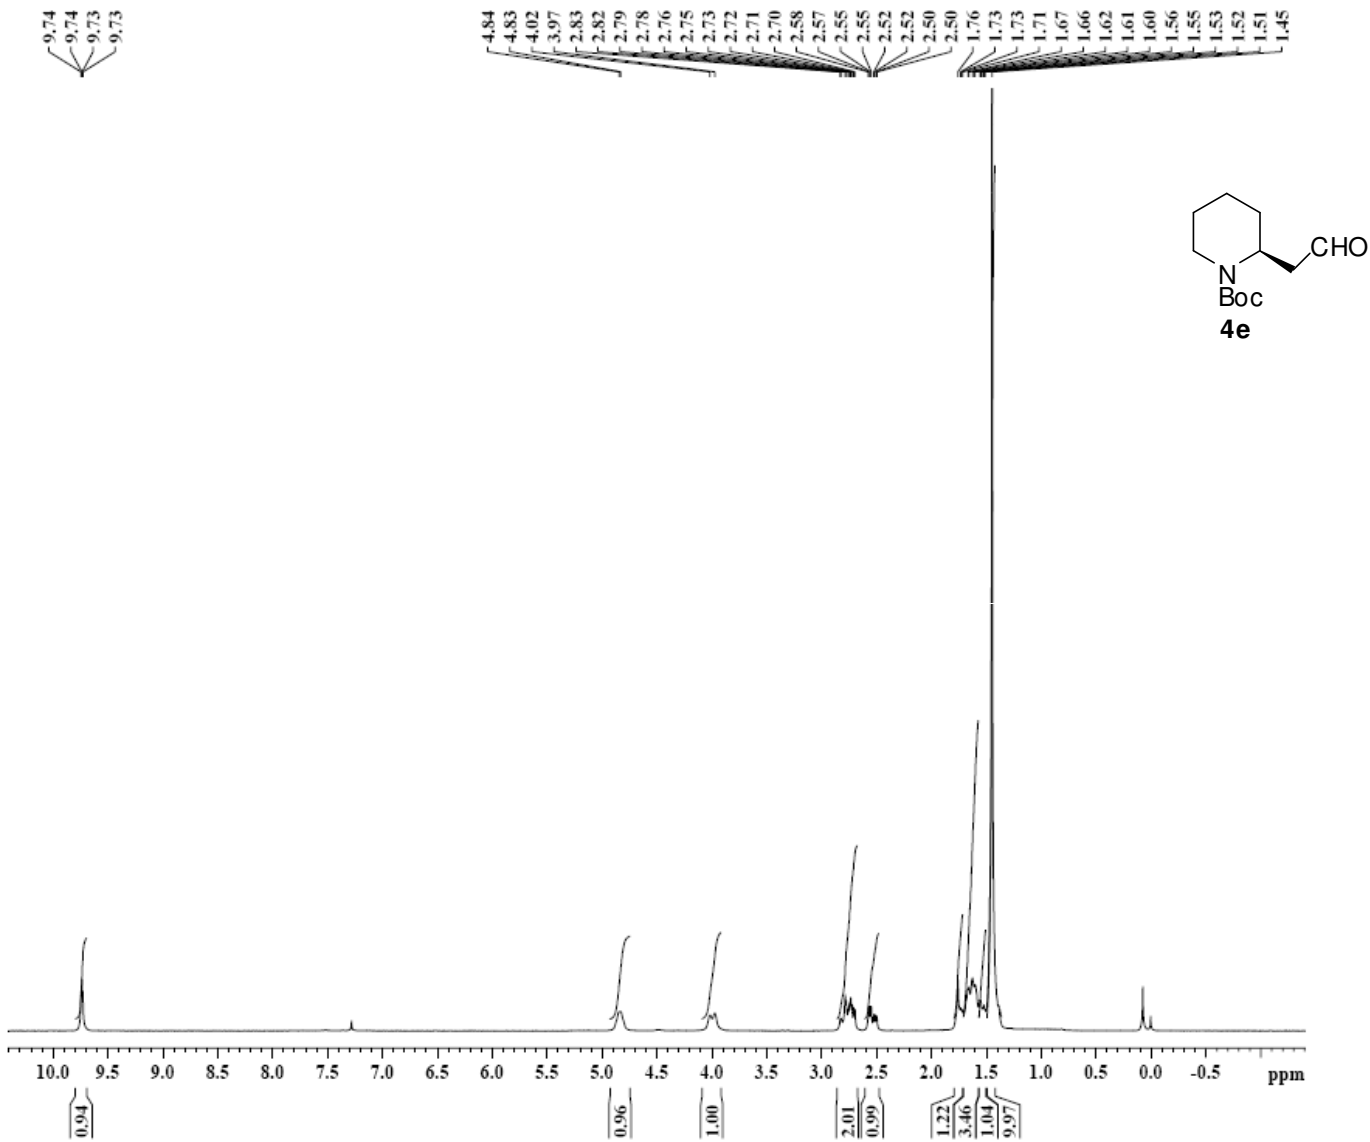

Fig.90 <sup>1</sup>H spectra of compound **4e**

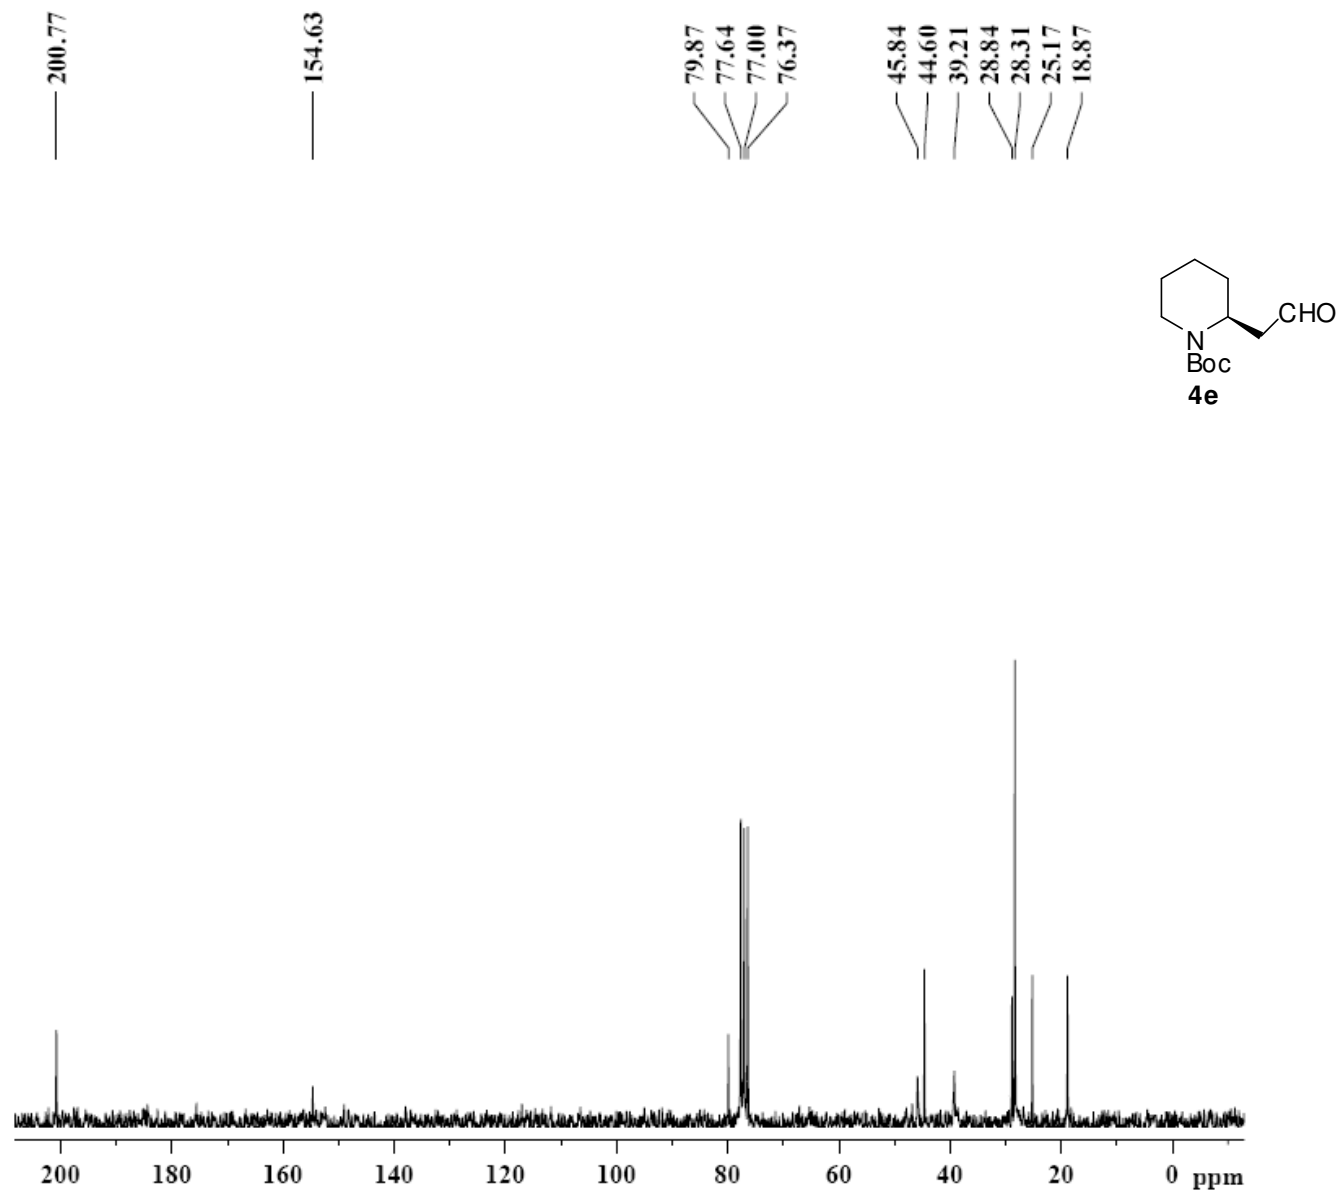

Fig.91 <sup>13</sup>C spectra of compound **4e**

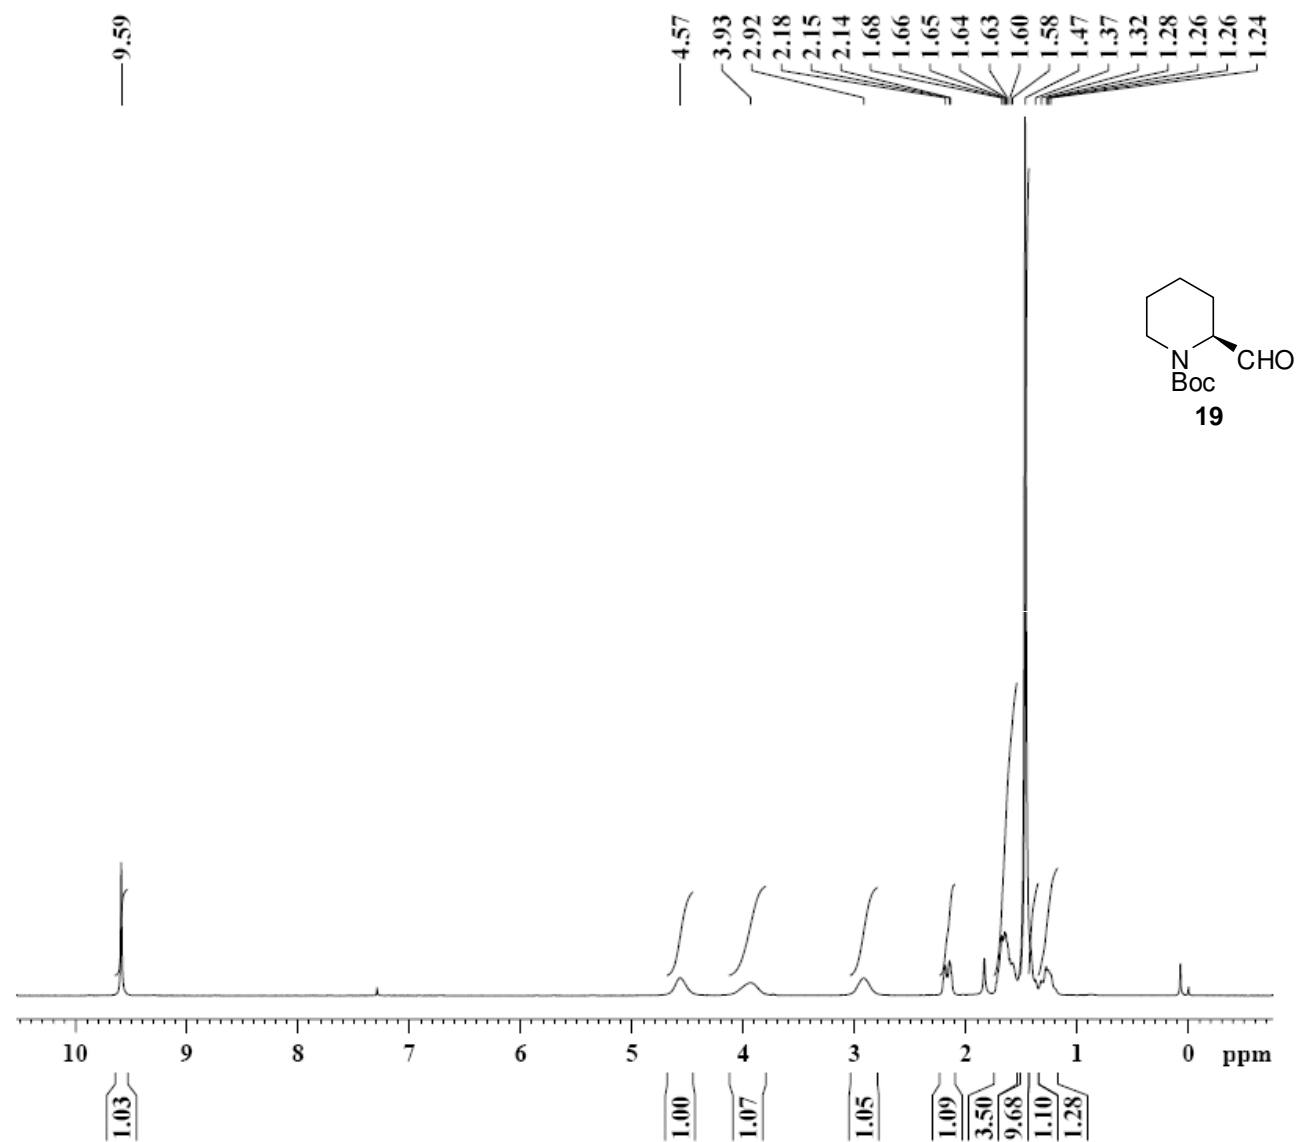

Fig.92  $^1\text{H}$  spectra of compound 19

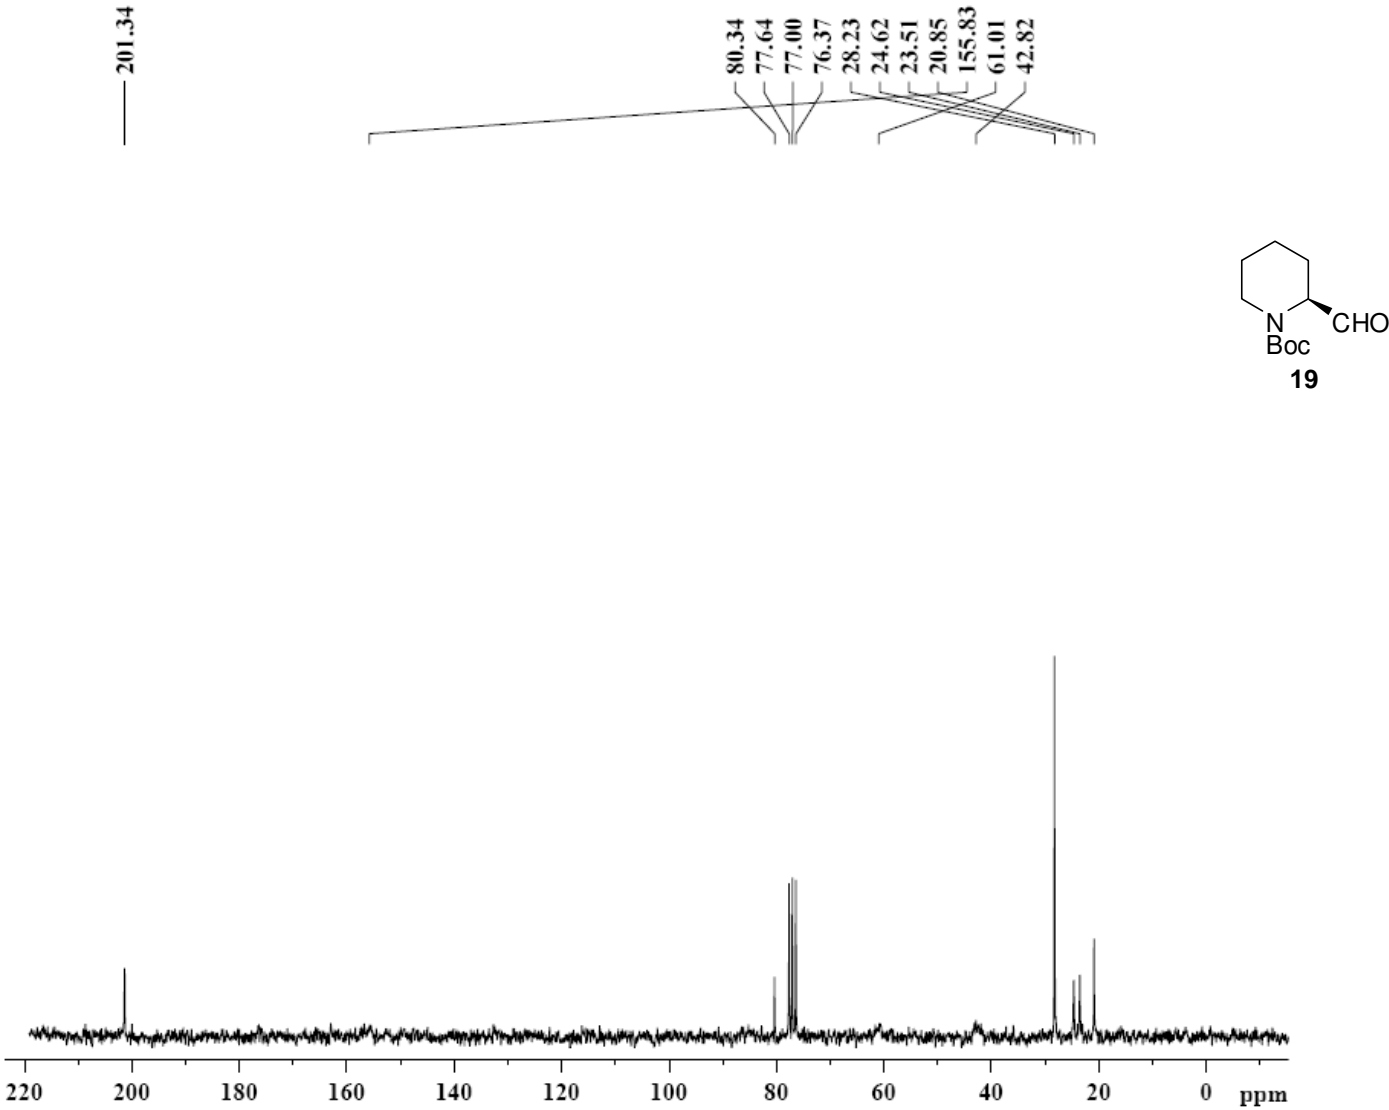

Fig.93 <sup>13</sup>C spectra of compound 19
